# Supplementary material for: Design, Synthesis and Evaluation of Novel Derivatives of Curcuminoids with Cytotoxicity
Source: MDPI journal article supplement (doi:10.3390/ijms222212171), 2021-11-10

# Design, Synthesis and Evaluation of Novel Derivatives of Curcuminoids with Cytotoxicity

Chen-Yin Chen<sup>1#</sup>, Jin-Cherng Lien<sup>1#</sup>, Chien-Yu Chen<sup>1</sup>, Chin-Chuan Hung<sup>\*12</sup> and Hui-Chang Lin<sup>\*1</sup>

<sup>1</sup> School of Pharmacy, China Medical University, No. 100, Sec. 1, Jingmao Rd., Beitun Dist., Taichung City, 406040, Taiwan, ROC

<sup>2</sup> Department of Pharmacy, China Medical University Hospital, 2 Yude Road, Taichung 40447, Taiwan, R.O.C.

\* the correspondence author; email: cchung@mail.cmu.edu.tw.

# the authors contributed to the work equally

(Total 1 pages include this cover page)

## Supplementary Materials

---

|                                                                                              |         |
|----------------------------------------------------------------------------------------------|---------|
| <sup>1</sup> H, <sup>13</sup> C NMR and mass for compound 1-24, 1a-7a, 12a, 14a, MD1-13..... | S2-19   |
| <sup>1</sup> H, <sup>13</sup> C NMR spectra for compound 1-24, 1a-7a, 12a, 14a, MD1-13.....  | S20-100 |

---

## Supplementary Materials

### Mass and $^1\text{H}$ and $^{13}\text{C}$ NMR data

*(E)*-5-hydroxy-1,7-diphenylhept-1-en-3-one (1)

Reference compound [22]

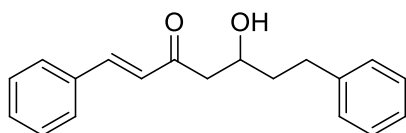

Known compound; white solid; yield 77.7%.  $^1\text{H}$  NMR (500 MHz,  $\text{CDCl}_3$ )  $\delta$  7.49-7.46 (m, 3H), 7.34-7.32 (m, 3H), 7.21-7.11 (m, 5H), 6.63 (d,  $J$  = 15 Hz, 1H), 4.11-4.07 (m, 1H), 2.83-2.63 (m, 4H), 1.85-1.80 (m, 1H), 1.74-1.68 (m, 1H);  $^{13}\text{C}$  NMR (125 MHz,  $\text{CDCl}_3$ )  $\delta$  201.0, 143.8, 142.1, 134.3, 131.0, 129.2, 128.6, 128.6, 126.4, 126.0, 67.3, 47.0, 38.3, 32.0; HRMS [ESI] $^+$  calculated for  $\text{C}_{19}\text{H}_{21}\text{O}_2$ : 281.1536 [M + H] $^+$ ; found: 281.1545.

*(1E,4E)*-1,7-diphenylhepta-1,4-dien-3-one (1a)

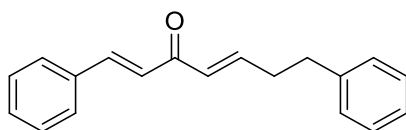

Known compound; yellow viscous oil; yield 90.2%.  $^1\text{H}$  NMR (500 MHz,  $\text{CD}_3\text{OD}$ )  $\delta$  7.58-7.55 (m, 3H), 7.34-7.33 (m, 3H), 7.22-7.09 (m, 5H), 7.03-6.99 (m, 2H), 6.43 (d,  $J$  = 15 Hz, 1H), 2.76 (t,  $J$  = 7.5 Hz, 2H), 2.57-2.53 (m, 2H);  $^{13}\text{C}$  NMR (125 MHz,  $\text{CD}_3\text{OD}$ )  $\delta$  191.8, 149.4, 145.2, 142.5, 136.3, 131.8, 130.8, 130.2, 129.7, 129.6, 129.6, 127.3, 125.9, 35.7, 35.6. HRMS [ESI] $^+$  calculated for  $\text{C}_{19}\text{H}_{19}\text{O}$ : 263.1430 [M + H] $^+$ ; found: 263.1429.

*(E)*-1-(3,4-dimethoxyphenyl)-5-hydroxy-7-phenylhept-1-en-3-one (2)

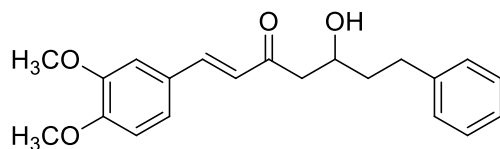

Yellowish powder; yield 80.3%; m.p.: 66.6-67.5  $^{\circ}\text{C}$ .  $^1\text{H}$  NMR (500 MHz,  $\text{CD}_3\text{OD}$ )  $\delta$  7.47 (d,  $J$  = 15 Hz, 1H), 7.17-7.04 (m, 7H), 6.84 (d,  $J$  = 5 Hz, 1H), 6.63 (d,  $J$  = 15 Hz, 1H), 4.08-4.03 (m, 1H), 3.75 (s, 6H), 2.82-2.78 (m, 1H), 2.71-2.59 (m, 2H), 2.58-2.56 (m, 1H), 1.74-1.71 (m, 2H);  $^{13}\text{C}$  NMR (125 MHz,  $\text{CD}_3\text{OD}$ )  $\delta$  201.8, 153.2, 150.8, 145.3, 143.5, 129.3, 129.0, 126.9, 125.7, 124.7, 112.7, 111.8, 68.9, 56.6, 56.5, 49.1, 40.4, 33.0. HRMS [ESI] $^+$  calculated for  $\text{C}_{21}\text{H}_{25}\text{O}_4$ : 341.1747 [M + H] $^+$ ; found: 341.1757.

*(E)*-5-hydroxy-7-phenyl-1-(3,4,5-trimethoxyphenyl)hept-1-en-3-one (3)

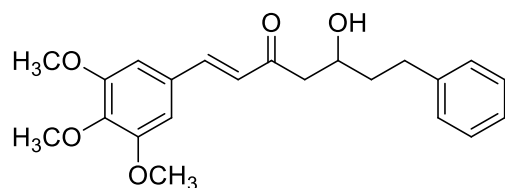

Yellow viscous oil; yield 74.3%.  $^1\text{H}$  NMR (500 MHz,  $\text{CD}_3\text{OD}$ )  $\delta$  7.47 (d,  $J$  = 15 Hz, 1H), 7.17-7.11 (m, 4H), 7.08-7.04 (m, 1H), 6.82 (s, 1H), 6.69 (d,  $J$  = 15 Hz, 1H), 4.09-4.04 (m, 1H), 3.75 (s, 6H), 3.69 (s, 3H), 2.82-2.78 (m, 1H), 2.72-2.67 (m, 2H), 2.61-2.55 (m, 1H), 1.73-1.69 (m, 2H);  $^{13}\text{C}$  NMR (125 MHz,  $\text{CD}_3\text{OD}$ )  $\delta$  201.7, 154.9, 145.1, 143.5, 141.6, 131.8, 129.6, 129.5, 127.2, 126.9, 107.1, 68.8, 61.3, 56.8, 49.1, 40.5, 33.0. HRMS  $[\text{ESI}]^+$  calculated for  $\text{C}_{22}\text{H}_{27}\text{O}_5$ : 371.1853  $[\text{M} + \text{H}]^+$ ; found: 371.1862.

(1E,4E)-7-phenyl-1-(3,4,5-trimethoxyphenyl)hepta-1,4-dien-3-one (3a)

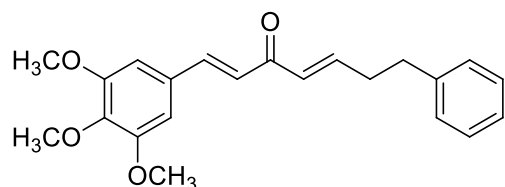

Yellow oil; yield 86.5%.  $^1\text{H}$  NMR (500 MHz,  $\text{CD}_3\text{OD}$ )  $\delta$  7.52 (d,  $J$  = 15 Hz, 1H), 7.22-6.91 (m, 9H), 6.45 (d,  $J$  = 15 Hz, 1H), 3.82 (s, 6H), 3.73 (s, 3H), 2.79-2.76 (m, 2H), 2.61-2.54 (m, 2H);  $^{13}\text{C}$  NMR (125 MHz,  $\text{CD}_3\text{OD}$ )  $\delta$  191.8, 155.0, 149.3, 145.4, 132.1, 130.9, 129.7, 129.6, 127.3, 125.3, 107.3, 61.4, 56.9, 35.8, 35.7. HRMS  $[\text{ESI}]^+$  calculated for  $\text{C}_{22}\text{H}_{25}\text{O}_4$ : 353.1747  $[\text{M} + \text{H}]^+$ ; found: 353.1746.

(E)-5-hydroxy-1-(4-methoxyphenyl)-7-phenylhept-1-en-3-one (4)

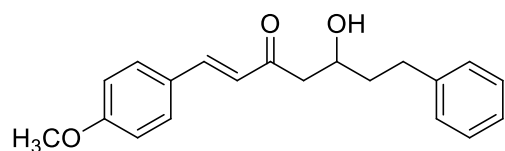

Yellow oil; yield 83.2%.  $^1\text{H}$  NMR (500 MHz,  $\text{CD}_3\text{OD}$ )  $\delta$  7.51-7.46 (m, 3H), 7.17-7.10 (m, 4H), 7.06-7.03 (m, 1H), 6.85 (d,  $J$  = 5 Hz, 2H), 6.62 (d,  $J$  = 15 Hz, 1H), 4.78-4.01 (m, 1H), 3.72 (s, 3H), 2.81-2.77 (m, 1H), 2.74-2.67 (m, 2H), 2.61-2.55 (m, 1H), 1.76-1.73 (m, 2H);  $^{13}\text{C}$  NMR (125 MHz,  $\text{CD}_3\text{OD}$ )  $\delta$  201.9, 163.5, 145.1, 143.5, 131.5, 129.6, 129.5, 128.6, 126.9, 125.4, 115.6, 68.9, 56.0, 48.9, 40.4, 33.0. HRMS  $[\text{ESI}]^+$  calculated for  $\text{C}_{20}\text{H}_{23}\text{O}_3$ : 311.1642  $[\text{M} + \text{H}]^+$ ; found: 311.1651.

(1E,4E)-1-(4-methoxyphenyl)-7-phenylhepta-1,4-dien-3-one (4a)

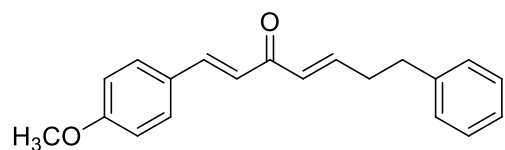

Yellow solid; yield 88.7%; m.p.: 55-54 °C. <sup>1</sup>H NMR (500 MHz, CD<sub>3</sub>OD) δ 7.55-7.51 (m, 3H), 7.21-7.08 (m, 5H), 6.99-6.85 (m, 4H), 6.42 (d, *J* = 15 Hz, 1H), 3.75 (s, 3H), 2.76-2.73 (m, 2H), 2.55-2.50 (m, 2H); <sup>13</sup>C NMR (125 MHz, CD<sub>3</sub>OD) δ 191.9, 163.6, 148.8, 145.4, 142.5, 131.6, 130.8, 129.6, 129.6, 128.9, 127.3, 123.6, 115.7, 56.1, 35.7, 35.7. HRMS [ESI]<sup>+</sup> calculated for C<sub>20</sub>H<sub>21</sub>O<sub>2</sub>: 293.1536 [M + H]<sup>+</sup>; found: 293.1533.

*(E)*-5-hydroxy-1-(4-hydroxyphenyl)-7-phenylhept-1-en-3-one (5)

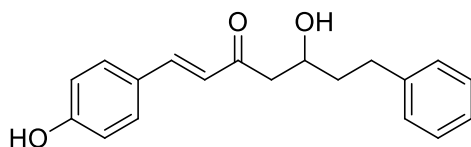

Yellow solid; yield 78.6%; m.p. 111-112 °C. NMR (500 MHz, CD<sub>3</sub>OD) δ 7.45 (d, *J* = 15 Hz, 1H), 7.36-7.34 (m, 2H), 7.14-7.07 (m, 4H), 7.03-7.01 (m, 1H), 6.72 (d, *J* = 10 Hz, 2H), 6.54 (d, *J* = 15 Hz, 1H), 4.77 (brs, 2H), 4.04-3.99 (m, 1H), 2.78-2.72 (m, 1H), 2.70-2.62 (m, 2H), 2.59-2.53 (m, 1H), 1.71-1.66 (m, 2H); <sup>13</sup>C NMR (125 MHz, CD<sub>3</sub>OD) δ 202.0, 161.7, 145.7, 143.5, 131.8, 129.6, 129.6, 127.4, 127.0, 124.7, 117.1, 69.0, 48.8, 40.4, 33.1. HRMS [ESI]<sup>+</sup> calculated for C<sub>19</sub>H<sub>19</sub>O<sub>3</sub>: 295.1329 [M + H]<sup>+</sup>; found: 295.1339.

*(1E,4E)*-1-(4-hydroxyphenyl)-7-phenylhepta-1,4-dien-3-one (5a)

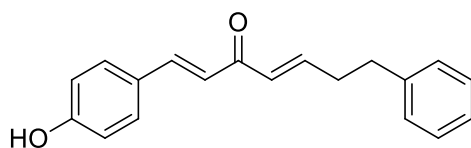

Yellow solid; yield 81.5%; m.p.: 130.1-131.3 °C. NMR (500 MHz, CD<sub>3</sub>OD) δ 7.51 (d, *J* = 15 Hz, 1H), 7.43 (d, *J* = 5 Hz, 2H), 7.20-7.07 (m, 5H), 6.97-6.93 (m, 1H), 6.81 (d, *J* = 15 Hz, 1H), 6.72 (d, *J* = 5 Hz, 2H), 6.41 (d, *J* = 15 Hz, 1H), 2.76-2.73 (m, 2H), 2.54-2.50 (m, 2H); <sup>13</sup>C NMR (125 MHz, CD<sub>3</sub>OD) δ 192.0, 161.8, 148.6, 145.9, 142.5, 131.8, 129.6, 129.6, 127.7, 127.3, 122.8, 117.1, 35.7, 35.7. HRMS [ESI]<sup>+</sup> calculated for C<sub>19</sub>H<sub>17</sub>O<sub>2</sub>: 277.1223 [M + H]<sup>+</sup>; found: 277.1223.

*(E)*-1-(4-fluorophenyl)-5-hydroxy-7-phenylhept-1-en-3-one (6)

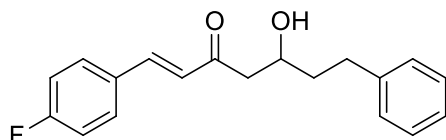

Yellow solid; yield 73.5%; m.p.: 100.9-101.8 °C. NMR (500 MHz, CD<sub>3</sub>OD) δ 7.59-7.57 (m, 2H), 7.52 (d, *J* = 15 Hz, 1H), 7.17-7.11 (m, 4H), 7.07-7.04 (m, 3H), 6.71 (d, *J* = 15 Hz, 1H), 4.07-4.02 (m, 1H), 2.84-2.79 (m, 1H), 2.75-2.69 (m, 2H), 2.63-2.57 (m, 1H), 1.75-1.68 (m, 2H); <sup>13</sup>C NMR (125



MHz, CD<sub>3</sub>OD)  $\delta$  201.7, 166.7, 164.7, 143.6, 143.5, 132.6, 132.6, 131.9, 131.8, 129.6, 129.5, 127.7, 127.0, 117.2, 117.0, 68.8, 49.1, 40.5, 33.0. HRMS [ESI]<sup>+</sup> calculated for C<sub>19</sub>H<sub>20</sub>O<sub>2</sub>F: 299.1442 [M + H]<sup>+</sup>; found: 299.1452.

(1E,4E)-1-(4-fluorophenyl)-7-phenylhepta-1,4-dien-3-one (6a)

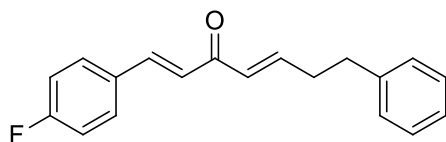

Yellow oil; yield 77.8%. NMR (500 MHz, CD<sub>3</sub>OD)  $\delta$  7.62-7.59 (m, 2H), 7.53 (d, *J* = 10 Hz, 1H), 7.21-6.94 (m, 9H), 6.41 (d, *J* = 15 Hz, 1H), 2.76-2.73 (m, 2H), 2.55-2.51 (m, 2H); <sup>13</sup>C NMR (125 MHz, CD<sub>3</sub>OD)  $\delta$  191.6, 166.6, 164.7, 149.5, 143.8, 142.5, 132.7, 131.9, 131.9, 130.8, 129.6, 127.3, 125.7, 117.2, 117.0, 35.7, 35.6. HRMS [ESI]<sup>+</sup> calculated for C<sub>19</sub>H<sub>18</sub>OF: 281.1336 [M + H]<sup>+</sup>; found: 281.1346.

(E)-1-(4-chlorophenyl)-5-hydroxy-7-phenylhept-1-en-3-one (7).

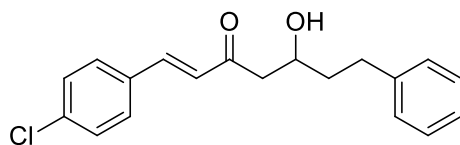

Yellow solid; yield 75.8%; m.p.: 85-85.9 °C. NMR (500 MHz, CD<sub>3</sub>OD)  $\delta$  7.50-7.46 (m, 3H), 7.3 (d, *J* = 15 Hz, 2H), 7.20-7.10 (m, 4H), 7.06-7.03 (m, 1H), 6.73 (d, *J* = 15 Hz, 1H), 4.07-4.02 (m, 1H), 2.83-2.79 (m, 1H), 2.73-2.68 (m, 2H), 2.62-2.57 (m, 1H), 1.74-1.69 (m, 2H); <sup>13</sup>C NMR (125 MHz, CD<sub>3</sub>OD)  $\delta$  201.5, 143.5, 143.3, 137.5, 134.8, 131.1, 130.3, 129.6, 129.5, 128.4, 126.9, 68.7, 49.2, 40.4, 33.0. HRMS [ESI]<sup>+</sup> calculated for C<sub>19</sub>H<sub>20</sub>O<sub>2</sub>Cl: 315.1146 [M + H]<sup>+</sup>; found: 315.1154.

(1E,4E)-1-(4-chlorophenyl)-7-phenylhepta-1,4-dien-3-one (7a)

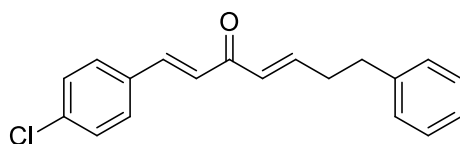

Yellow oil; yield 80.2 %. NMR (500 MHz, CD<sub>3</sub>OD)  $\delta$  7.54-7.48 (m, 3H), 7.32-7.30 (d, *J* = 5 Hz, 2H), 7.19-7.16 (m, 2H), 7.13-7.06 (m, 3H), 7.02-6.96 (m, 2H), 6.39 (d, *J* = 15 Hz, 1H), 2.75-2.72 (m, 2H), 2.54-2.49 (m, 2H); <sup>13</sup>C NMR (125 MHz, CD<sub>3</sub>OD)  $\delta$  191.5, 149.7, 143.5, 142.4, 137.5, 135.0, 131.1, 130.8, 130.4, 129.6, 127.3, 126.5, 35.7, 35.6. HRMS [ESI]<sup>+</sup> calculated for C<sub>19</sub>H<sub>18</sub>OCl: 297.1041 [M + H]<sup>+</sup>; found: 297.1048.

(E)-5-hydroxy-7-phenyl-1-(pyridin-2-yl)hept-1-en-3-one (8)

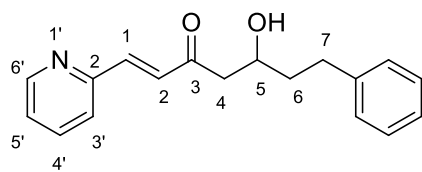

Colorless oil; yield 57%.  $^1\text{H}$  NMR (500 MHz,  $\text{CD}_3\text{OD}$ )  $\delta$  8.49-8.48 (m, 1H), 7.76-7.73 (m, 1H), 7.57 (d,  $J$  = 5 Hz, 1H), 7.49 (d,  $J$  = 15 Hz, 1H), 7.30-7.27 (m, 1H), 7.15-7.08 (m, 1H), 7.05-7.01 (m, 7H), 4.09-4.02 (m, 1H), 2.86-2.81 (m, 1H), 2.76-2.67 (m, 2H), 2.61-2.56 (m, 1H), 1.73-1.68 (m, 2H);  $^{13}\text{C}$  NMR (125 MHz,  $\text{CD}_3\text{OD}$ )  $\delta$  201.5, 154.5, 151.1, 143.5, 142.68, 139.0, 131.5, 129.6, 129.5, 126.9, 126.1, 126.0, 68.6, 49.5, 40.5, 33.1. HRMS  $[\text{ESI}]^+$  calculated for  $\text{C}_{18}\text{H}_{20}\text{NO}_2$ : 282.1489  $[\text{M} + \text{H}]^+$ ; found: 282.1496.

1,5-dihydroxy-7-phenyl-1-(pyridin-3-yl)heptan-3-one (9)

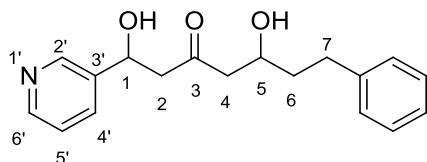

Yellow oil; yield 62.8%.  $^1\text{H}$  NMR (500 MHz,  $\text{CDCl}_3$ )  $\delta$  8.64-8.57 (m, 2H), 7.79 (d,  $J$  = 10.0 Hz, 1H), 7.43-7.40 (m, 1H), 7.23-7.18 (m, 2H), 7.13-7.10 (m, 3H), 4.67-4.64 (m, 1H), 3.72-3.69 (m, 1H), 2.97-2.80 (brs, 2H), 2.79-2.77 (m, 1H), 2.75-2.69 (m, 1H), 2.63-2.60 (m, 1H), 2.47-2.33 (m, 3H), 2.06-2.02 (m, 1H), 1.88-1.85 (m, 1H);  $^{13}\text{C}$  NMR (125 MHz,  $\text{CDCl}_3$ )  $\delta$  205.0, 147.1, 145.3, 141.0, 135.3, 128.5, 128.3, 126.1, 124.3, 76.7, 76.5, 48.8, 47.4, 37.6, 31.4. HRMS  $[\text{ESI}]^+$  calculated for  $\text{C}_{18}\text{H}_{22}\text{NO}_3$ : 300.1594  $[\text{M} + \text{H}]^+$ ; found: 300.1600.

(E)-5-hydroxy-7-phenyl-1-(pyridin-3-yl)hept-1-en-3-one (10)

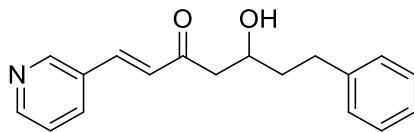

Yellow oil; yield 62.8%.  $^1\text{H}$  NMR (500 MHz,  $\text{CD}_3\text{OD}$ )  $\delta$  8.62 (d,  $J$  = 5.0 Hz, 1H), 8.42 (d,  $J$  = 5.0 Hz, 1H), 7.96 (d,  $J$  = 5 Hz, 1H), 7.52-7.48 (m, 1H), 7.34-7.31 (m, 1H), 7.14-7.08 (m, 4H), 7.04-7.01 (m, 1H), 6.84 (d,  $J$  = 15.0 Hz, 1H), 4.78-4.03 (m, 1H), 2.85-2.81 (m, 1H), 2.74-2.67 (m, 2H), 2.60-2.54 (m, 1H), 1.75-1.68 (m, 2H);  $^{13}\text{C}$  NMR (125 MHz,  $\text{CD}_3\text{OD}$ )  $\delta$  201.0, 151.5, 150.6, 143.4, 140.3, 136.6, 132.6, 129.6, 129.5, 126.9, 125.6, 68.6, 49.4, 40.4, 33.04. HRMS  $[\text{ESI}]^+$  calculated for  $\text{C}_{18}\text{H}_{20}\text{NO}_2$ : 282.1489  $[\text{M} + \text{H}]^+$ ; found: 282.1493.

(E)-5-hydroxy-7-phenyl-1-(pyridin-4-yl)hept-1-en-3-one (11)

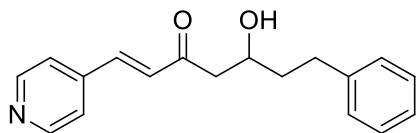

Yellow oil; yield 66.6%.  $^1\text{H}$  NMR (500 MHz,  $\text{CD}_3\text{OD}$ )  $\delta$  8.45 (d,  $J$  = 5 Hz, 2H), 7.54-7.42 (m, 3H), 7.45-7.42 (m, 2H), 7.15-7.08 (m, 3H), 7.04-7.01 (m, 1H), 6.93 (d,  $J$  = 15 Hz, 1H), 4.78-4.02 (m, 1H), 2.85-2.81 (m, 1H), 2.75-2.67 (m, 2H), 2.60-2.54 (m, 1H), 1.73-1.68 (m, 2H);  $^{13}\text{C}$  NMR (125 MHz,  $\text{CD}_3\text{OD}$ )  $\delta$  200.9, 151.0, 144.7, 143.5, 140.7, 133.9, 133.2, 133.1, 132.3, 130.1, 130.1, 129.6, 129.5, 127.0, 123.9, 68.5, 49.5, 40.5, 33.0. HRMS  $[\text{ESI}]^+$  calculated for  $\text{C}_{18}\text{H}_{20}\text{O}_2\text{N}$ : 282.1483  $[\text{M} + \text{H}]^+$ ; found: 282.1489.

(*E*)-1-(furan-2-yl)-5-hydroxy-7-phenylhept-1-en-3-one (12)

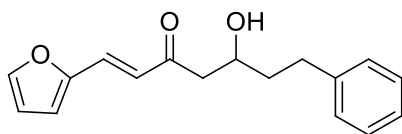

Yellowish solid; yield 63%; m.p.: 55-56 °C.  $^1\text{H}$  NMR (500 MHz,  $\text{CD}_3\text{OD}$ )  $\delta$  7.57 (s, 1H), 7.33 (d,  $J$  = 15 Hz, 1H), 7.19-7.12 (m, 4H), 7.08-7.05 (m, 1H), 6.75 (d,  $J$  = 5 Hz, 1H), 6.56 (d,  $J$  = 15 Hz, 1H), 6.49-6.48 (m, 1H), 4.05-4.01 (m, 1H), 2.80-2.57 (m, 4H), 1.75-1.69 (m, 2H);  $^{13}\text{C}$  NMR (125 MHz,  $\text{CD}_3\text{OD}$ )  $\delta$  201.4, 152.6, 147.0, 143.5, 131.2, 129.6, 129.5, 126.9, 124.9, 117.7, 113.9, 68.9, 49.1, 40.51, 33.0. HRMS  $[\text{ESI}]^+$  calculated for  $\text{C}_{17}\text{H}_{19}\text{O}_3$ : 271.1329  $[\text{M} + \text{H}]^+$ ; found: 271.1334.

(1*E*,4*E*)-1-(furan-2-yl)-7-phenylhepta-1,4-dien-3-one (12a)

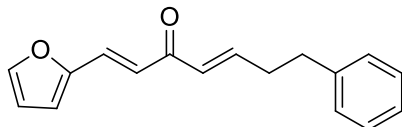

Yellow oil; yield 66%.  $^1\text{H}$  NMR (500 MHz,  $\text{CD}_3\text{OD}$ )  $\delta$  7.56 (s, 1H), 7.34 (d,  $J$  = 15 Hz, 1H), 7.20-7.17 (m, 2H), 7.13-7.07 (m, 3H), 6.96-6.90 (m, 1H), 6.79-6.73 (m, 2H), 6.48-6.47 (m, 1H), 6.34 (d,  $J$  = 15 Hz, 1H), 2.74-2.71 (m, 2H), 2.52-2.48 (m, 2H);  $^{13}\text{C}$  NMR (125 MHz,  $\text{CD}_3\text{OD}$ )  $\delta$  191.3, 152.8, 149.1, 147.0, 142.4, 131.3, 130.8, 129.6, 127.3, 123.0, 117.7, 114.0, 35.7, 35.6. HRMS  $[\text{ESI}]^+$  calculated for  $\text{C}_{17}\text{H}_{17}\text{O}_2$ : 253.1223  $[\text{M} + \text{H}]^+$ ; found: 253.1215.

(*E*)-1-(furan-3-yl)-5-hydroxy-7-phenylhept-1-en-3-one (13)

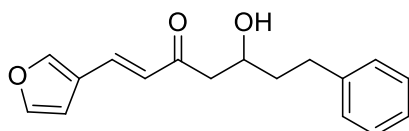

Brown oil; yield 70.5%.  $^1\text{H}$  NMR (500 MHz,  $\text{CD}_3\text{OD}$ )  $\delta$  7.74 (s, 1H), 7.47 (d,  $J$  = 15 Hz, 1H), 7.18-7.14 (m, 2H), 7.11-7.05 (m, 4H), 6.51 (s, 1H), 6.40 (d,  $J$  = 15 Hz, 1H), 4.78-4.01 (m, 1H), 2.64-2.55

(m, 2H), 2.23 (m, 2H), 2.06-1.99 (m, 2H). HRMS [ESI]<sup>+</sup> calculated for C<sub>17</sub>H<sub>19</sub>O<sub>3</sub>: 271.1246 [M + H]<sup>+</sup>; found: 271.1245.

*(E)*-5-hydroxy-7-phenyl-1-(thiophen-2-yl)hept-1-en-3-one (14)

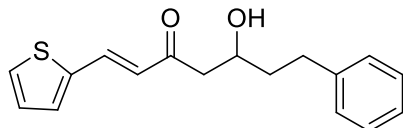

Yellow solid; yield 65%; m.p.: 94.8-95.7 °C. <sup>1</sup>H NMR (500 MHz, CD<sub>3</sub>OD) δ 7.59 (s, 2H), 7.52 (d, *J* = 15 Hz, 1H), 7.31-7.27 (m, 1H), 7.16-7.09 (m, 4H), 7.06-7.03 (m, 1H), 6.55 (d, *J* = 15 Hz, 1H), 4.05 (brs, 1H), 2.81-2.76 (m, 1H), 2.72-2.65 (m, 2H), 2.64-2.56 (m, 1H), 1.73-1.68 (m, 2H); <sup>13</sup>C NMR (125 MHz, CD<sub>3</sub>OD) δ 202.0, 143.4, 139.2, 138.6, 130.8, 129.5, 129.5, 128.3, 127.4, 126.9, 126.4, 68.7, 48.9, 40.3, 33.0. HRMS [ESI]<sup>+</sup> calculated for C<sub>17</sub>H<sub>19</sub>O<sub>2</sub>S: 287.1100 [M + H]<sup>+</sup>; found: 287.1108.

*(1E,4E)*-7-phenyl-1-(thiophen-2-yl)hepta-1,4-dien-3-one (14a)

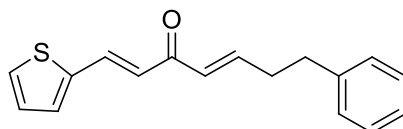

Yellowish oil; yield 72%. <sup>1</sup>H NMR (500 MHz, CD<sub>3</sub>OD) δ 7.70 (s, 1H), 7.58 (d, *J* = 15 Hz, 1H), 7.40-7.38 (m, 2H), 7.22-7.14 (m, 2H), 7.12-7.09 (m, 2H), 7.01-6.96 (m, 1H), 6.85 (d, *J* = 15 Hz, 1H), 6.42 (d, *J* = 15 Hz, 1H), 2.78-2.75 (m, 2H), 2.56-2.52 (m, 2H); <sup>13</sup>C NMR (125 MHz, CD<sub>3</sub>OD) δ 192.1, 149.1, 142.5, 139.6, 138.9, 130.8, 130.7, 129.6, 128.4, 127.3, 126.5, 125.6, 35.7, 35.6. HRMS [ESI]<sup>+</sup> calculated for C<sub>17</sub>H<sub>17</sub>OS: 269.0995 [M + H]<sup>+</sup>; found: 269.1000.

*(E)*-5-hydroxy-1-(5-methylthiophen-2-yl)-7-phenylhept-1-en-3-one (15)

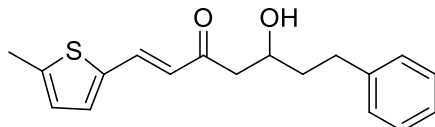

Yellowish oil; yield 60.4%. <sup>1</sup>H NMR (500 MHz, CDCl<sub>3</sub>) δ 7.50 (d, *J* = 15 Hz, 1H), 7.22-7.17 (m, 2H), 7.14-7.09 (m, 3H), 7.04-7.03 (m, 1H), 6.66-6.65 (m, 1H), 6.30 (d, *J* = 15 Hz, 1H), 4.07-4.02 (m, 1H), 2.79-2.65 (m, 5H), 2.42 (s, 3H), 1.83-1.78 (m, 1H), 1.68-1.66 (m, 1H); <sup>13</sup>C NMR (125 MHz, CDCl<sub>3</sub>) δ 200.2, 145.1, 141.9, 137.5, 136.4, 133.0, 128.4, 128.3, 126.8, 125.7, 123.5, 67.2, 46.7, 38.1, 31.7, 15.8. HRMS [ESI]<sup>+</sup> calculated for C<sub>18</sub>H<sub>21</sub>O<sub>2</sub>S: 301.1257 [M + H]<sup>+</sup>; found: 301.1255.

*(E)*-5-hydroxy-7-phenyl-1-(1H-pyrrol-2-yl)hept-1-en-3-one (16)

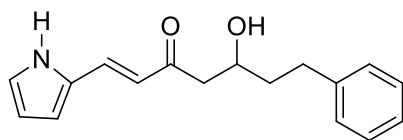

Yellow solid; yield 68.7%; m.p.: 109.5-110.3 °C.  $^1\text{H}$  NMR (500 MHz,  $\text{CD}_3\text{OD}$ )  $\delta$  7.43 (d,  $J$  = 15 Hz, 1H), 7.18-7.11 (m, 4H), 7.07-7.05 (m, 1H), 6.91(s, 1H), 6.53-6.52 (m, 1H), 6.39 (d,  $J$  = 15 Hz, 1H), 6.15-6.14 (m, 1H), 4.05-4.01 (m, 1H), 2.77-2.57 (m, 4H), 1.76-1.69 (m, 2H);  $^{13}\text{C}$  NMR (125 MHz,  $\text{CD}_3\text{OD}$ )  $\delta$  201.4, 143.6, 135.8, 129.6, 129.5, 126.9, 125.4, 120.5, 117.7, 111.9, 69.2, 48.7, 40.5, 33.1. HRMS  $[\text{ESI}]^+$  calculated for  $\text{C}_{17}\text{H}_{20}\text{O}_2\text{N}$ : 279.1489  $[\text{M} + \text{H}]^+$ ; found: 279.1480.

*(E)-5-hydroxy-1-(1H-indol-3-yl)-7-phenylhept-1-en-3-one (17)*

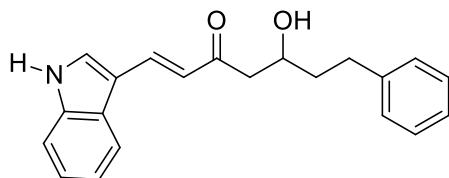

Yellow solid; yield 62.2%; m.p.: 145.6-146.0 °C.  $^1\text{H}$  NMR (500 MHz,  $\text{CD}_3\text{OD}$ )  $\delta$  7.84-7.79 (m, 2H), 7.61 (s, 1H), 7.35 (d,  $J$  = 5 Hz, 1H), 7.17-7.03 (m, 8H), 6.73 (d,  $J$  = 15 Hz, 1H), 4.08-4.03 (m, 1H), 2.82-2.68 (m, 3H), 2.63-2.59 (m, 1H), 1.76-1.71 (m, 2H);  $^{13}\text{C}$  NMR (125 MHz,  $\text{CD}_3\text{OD}$ )  $\delta$  202.3, 143.6, 140.7, 139.5, 133.4, 129.6, 129.5, 126.9, 126.8, 124.2, 122.3, 121.4, 114.3, 113.4, 69.3, 48.6, 40.5, 33.1. HRMS  $[\text{ESI}]^+$  calculated for  $\text{C}_{21}\text{H}_{22}\text{O}_2\text{N}$ : 320.1654  $[\text{M} + \text{H}]^+$ ; found: 320.1655.

*(E)-5-chloro-1-(4-fluorophenyl)-7-phenylhept-1-en-3-one (18)*

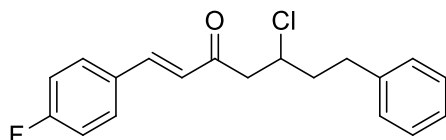

Yellow oil; yield 5.3%.  $^1\text{H}$  NMR (500 MHz,  $\text{CD}_3\text{OD}$ )  $\delta$  7.62-7.59 (m, 2H), 7.59-7.54 (m, 1H), 7.22-7.06 (m, 7H), 6.72 (d,  $J$  = 15 Hz, 1H), 4.36-4.32 (m, 1H, H5), 3.26-3.25 (m, 1H), 3.23-3.00 (m, 1H), 2.85-2.80 (m, 1H), 2.74-2.69 (m, 1H), 2.09-2.05 (m, 1H), 2.00-1.97 (m, 1H);  $^{13}\text{C}$  NMR (125 MHz,  $\text{CD}_3\text{OD}$ )  $\delta$  198.8, 166.7, 164.7, 143.9, 142.4, 132.4, 132.0, 131.9, 129.7, 129.7, 127.3, 127.1, 117.2, 117.1, 58.5, 49.9, 41.2, 33.7. HRMS  $[\text{ESI}]^+$  calculated for  $\text{C}_{19}\text{H}_{19}\text{OClF}$ : 317.1103  $[\text{M} + \text{H}]^+$ ; found: 317.1105.

*(1E,4Z)-5-hydroxy-1,7-diphenylhepta-1,4-dien-3-one (19)*

Reference compound [1]

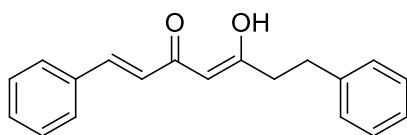

Known compound; yellow solid; yield 88%. HRMS [ESI]<sup>+</sup> calculated for C<sub>19</sub>H<sub>17</sub>O<sub>2</sub>: 277.1223 [M]<sup>+</sup>; found: 277.1232.

(1*E*,4*Z*)-5-hydroxy-1-(4-methoxyphenyl)-7-phenylhepta-1,4-dien-3-one (20)

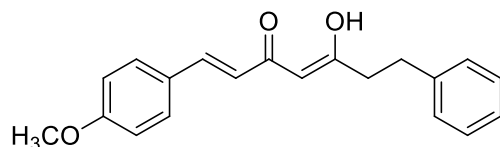

Yellow solid; yield 76%; m.p.: 80.1-81 °C. <sup>1</sup>H NMR (500 MHz, CD<sub>3</sub>OD) δ 7.46-7.43 (m, 3H), 7.19-7.06 (m, 6H), 6.86 (d, *J* = 5 Hz, 2H), 6.40 (d, *J* = 15 Hz, 1H), 5.66 (s, 1H), 3.76 (s, 3H), 2.86 (t, 2H), 2.61 (t, 2H); <sup>13</sup>C NMR (125 MHz, CD<sub>3</sub>OD) δ 201.1, 179.0, 163.0, 142.4, 141.0, 130.9, 129.6, 129.5, 127.3, 121.5, 115.6, 101.4, 56.0, 43.0, 32.6. HRMS [ESI]<sup>+</sup> calculated for C<sub>20</sub>H<sub>19</sub>O<sub>3</sub>: 307.1329 [M]<sup>+</sup>; found: 307.1337.

(1*E*,4*Z*)-1-(3,4-dimethoxyphenyl)-5-hydroxy-7-phenylhepta-1,4-dien-3-one (21)

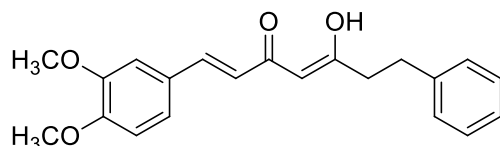

Yellow oil; yield 69.3%. <sup>1</sup>H NMR (500 MHz, CD<sub>3</sub>OD) δ 7.43 (d, *J* = 15 Hz, 1H), 7.19-7.03 (m, 8H), 6.86 (d, *J* = 5 Hz, 1H), 6.41 (d, *J* = 15 Hz, 1H), 3.77-3.70 (m, 6H), 2.87-2.84 (m, 2H), 2.62-2.59 (m, 2H). HRMS [ESI]<sup>+</sup> calculated for C<sub>21</sub>H<sub>21</sub>O<sub>4</sub>: 337.1434 [M]<sup>+</sup>; found: 337.1437.

(1*E*,4*Z*)-5-hydroxy-7-phenyl-1-(3,4,5 trimethoxyphenyl)hepta-1,4-dien-3-one (22)

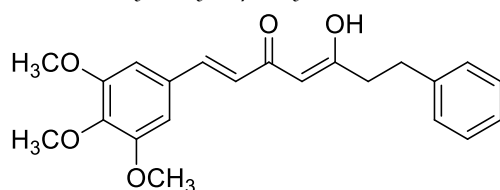

Yellow solid; yield 78%; m.p.: 82.8-83.4 °C. <sup>1</sup>H NMR (500 MHz, CD<sub>3</sub>OD) δ 7.41 (d, *J* = 15 Hz, 1H), 7.19-7.06 (m, 5H), 6.78 (s, 2H), 6.47 (d, *J* = 15 Hz, 1H), 5.67 (s, 1H), 3.77 (s, 6H), 3.71 (s, 3H), 2.85 (t, *J* = 7.5 Hz, 2H), 2.63-2.60 (m, 2H); <sup>13</sup>C NMR (125 MHz, CD<sub>3</sub>OD) δ 201.8, 177.9, 154.9, 142.4, 141.1, 141.0, 132.5, 129.6, 129.5, 127.3, 123.3, 106.7, 101.9, 61.3, 56.8, 43.1, 32.4. HRMS [ESI]<sup>+</sup> calculated for C<sub>22</sub>H<sub>23</sub>O<sub>5</sub>: 367.1532 [M]<sup>+</sup>; found: 367.1540.

(1*E*,4*Z*)-1-(4-fluorophenyl)-5-hydroxy-7-phenylhepta-1,4-dien-3-one (23)

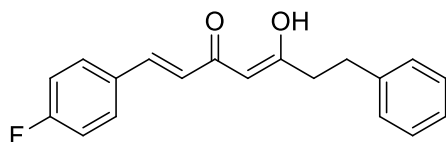

White solid; yield 62.5%; m.p.: 56-57 °C.  $^1\text{H}$  NMR (500 MHz,  $\text{CD}_3\text{OD}$ )  $\delta$  7.53-7.51 (m, 2H), 7.45 (d,  $J$  = 15 Hz, 1H), 7.18-7.11 (m, 5H), 7.08-7.01 (m, 3H), 6.48 (d, 1H,  $J$  = 15 Hz), 5.69 (s, 1H), 2.85 (t,  $J$  = 7.5 Hz, 2H), 2.65-2.62 (m, 2H). HRMS [ESI] $^-$  calculated for  $\text{C}_{19}\text{H}_{16}\text{O}_2\text{F}$ : 295.1140 [M] $^-$ ; found: 295.1130.

(1E,4Z)-1-(4-chlorophenyl)-5-hydroxy-7-phenylhepta-1,4-dien-3-one (24)

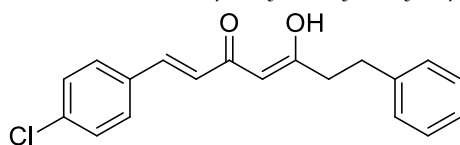

Brown solid; yield 72%; m.p.: 79.5-80.2 °C.  $^1\text{H}$  NMR (500 MHz,  $\text{CD}_3\text{OD}$ )  $\delta$  7.56-7.50 (m, 3H), 7.38-7.37 (m, 2H), 7.27-7.20 (m, 5H), 7.17-7.14 (m, 1H), 6.62 (d,  $J$  = 15 Hz, 1H), 5.78 (s, 1H), 2.94 (t, 2H), 2.73 (t, 2H);  $^{13}\text{C}$  NMR (125 MHz,  $\text{CD}_3\text{OD}$ )  $\delta$  202.5, 177.0, 142.4, 139.2, 136.8, 135.5, 130.5, 130.3, 129.6, 129.5, 127.3, 124.8, 102.2, 43.3, 32.4. HRMS [ESI] $^-$  calculated for  $\text{C}_{19}\text{H}_{16}\text{O}_2\text{Cl}$ : 311.0833 [M] $^-$ ; found: 311.0843.

(E)-5-hydroxy-1-(4-hydroxyphenyl)-7-(4-methoxyphenyl)hept-1-en-3-one (MD1)

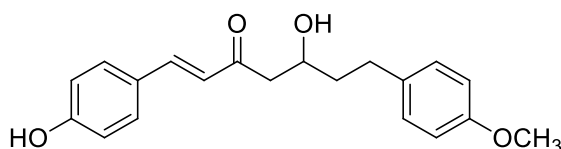

White solid; yield 70%; m.p.: 123-130 °C.  $^1\text{H}$  NMR (500 MHz,  $\text{CD}_3\text{OD}$ )  $\delta$  7.45 (d,  $J$  = 15 Hz, 1H), 7.38 (d,  $J$  = 5 Hz, 2H), 7.01 (d,  $J$  = 5 Hz, 2H), 6.71-6.69 (m, 4H), 6.55 (d,  $J$  = 15 Hz, 1H), 4.01-3.96 (m, 1H), 3.63, (s, 3H), 2.77-2.73 (m, 1H), 2.69-2.60 (m, 2H), 2.54-2.48 (m, 1H), 1.68-1.62 (m, 2H);  $^{13}\text{C}$  NMR (125 MHz,  $\text{CD}_3\text{OD}$ )  $\delta$  202.0, 161.8, 159.5, 145.7, 135.5, 131.8, 130.5, 127.4, 124.6, 117.1, 114.9, 68.9, 55.8, 48.9, 40.6, 32.1. HRMS [ESI] $^+$  calculated for  $\text{C}_{20}\text{H}_{23}\text{O}_4$ : 327.1591 [M + H] $^+$ ; found: 327.1585.

(1E,4E)-1-(4-hydroxyphenyl)-7-(4-methoxyphenyl)hepta-1,4-dien-3-one (MD1a)

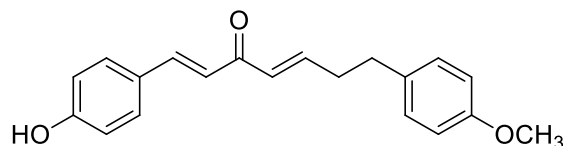

Yellow oil; yield 73%.  $^1\text{H}$ NMR (500 MHz,  $\text{CD}_3\text{OD}$ )  $\delta$  7.50 (d,  $J$  = 15 Hz, 1H), 7.44 (d,  $J$  = 5 Hz, 2H), 7.05 (d,  $J$  = 5 Hz, 2H), 6.96-6.91 (m, 1H), 6.83-6.79 (m, 1H), 6.76-6.73 (m, 4H), 6.40 (d,  $J$  = 15 Hz, 1H), 3.67, (s, 3H), 2.70-2.67 (m, 2H), 2.51-2.47 (m, 2H);  $^{13}\text{C}$  NMR (125 MHz,  $\text{CD}_3\text{OD}$ )  $\delta$  192.0, 161.8, 159.7, 148.8, 145.9, 134.5, 131.8, 130.8, 130.6, 127.7, 122.8, 117.1, 115.0, 55.8, 36.0, 34.8. HRMS  $[\text{ESI}]^+$  calculated for  $\text{C}_{20}\text{H}_{21}\text{O}_3$ : 309.1485  $[\text{M} + \text{H}]^+$ ; found: 309.1478.

*(E)*-5-hydroxy-1,7-bis(4-methoxyphenyl)hept-1-en-3-one (MD2)

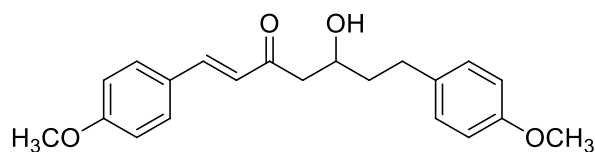

Yellow solid; yield 67.8%; m.p.: 43-44 °C.  $^1\text{H}$  NMR (500 MHz,  $\text{CD}_3\text{OD}$ )  $\delta$  7.51-7.48 (m, 3H), 7.04 (d,  $J$  = 5 Hz, 2H), 6.88-6.86 (m, 2H), 6.73 (d,  $J$  = 5Hz, 2H), 6.62 (d,  $J$  = 15 Hz, 1H), 4.05-4.00 (m, 1H), 3.75, (s, 3H), 3.74 (s, 3H), 2.81-2.50 (m, 4H), 2.51-2.47 (m, 2H), 1.71-1.67 (m, 2H);  $^{13}\text{C}$  NMR (125 MHz,  $\text{CD}_3\text{OD}$ )  $\delta$  202.0, 163.6, 159.4, 145.2, 135.5, 131.5, 130.5, 128.6, 125.4, 115.6, 115.0, 68.9, 56.1, 55.8, 49.01, 40.6, 32.1. HRMS  $[\text{ESI}]^+$  calculated for  $\text{C}_{21}\text{H}_{25}\text{O}_4$ : 341.1747  $[\text{M} + \text{H}]^+$ ; found: 341.1744.

*(1E,4E)*-1,7-bis(4-methoxyphenyl)hepta-1,4-dien-3-one (MD2a)

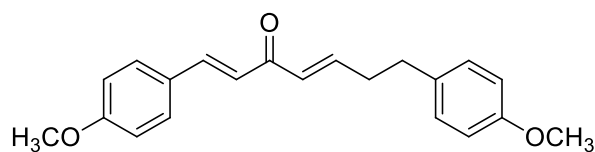

Yellow solid; yield 70.4%; m.p.: 55.5-56 °C.  $^1\text{H}$  NMR (500 MHz,  $\text{CD}_3\text{OD}$ )  $\delta$  7.52-7.49 (m, 3H), 7.04 (d,  $J$  = 5 Hz, 2H), 6.97-6.91 (m, 1H), 6.88-6.83 (m, 3H), 6.75 (d,  $J$  = 5 Hz, 2H), 6.39 (d,  $J$  = 15 Hz, 1H), 3.74, (s, 3H), 3.66 (s, 3H), 2.69-2.66 (m, 2H), 2.50-2.46 (m, 2H);  $^{13}\text{C}$  NMR (125 MHz,  $\text{CD}_3\text{OD}$ )  $\delta$  191.9, 163.6, 159.7, 149.0, 145.3, 134.4, 131.6, 130.8, 130.6, 128.8, 123.6, 115.7, 115.0, 56.1, 55.8, 36.0, 34.8. HRMS  $[\text{ESI}]^+$  calculated for  $\text{C}_{21}\text{H}_{23}\text{O}_3$ : 323.1642  $[\text{M} + \text{H}]^+$ ; found: 323.1633.

*(E)*-1-(3,4-dimethoxyphenyl)-5-hydroxy-7-(4-methoxyphenyl)hept-1-en-3-one (MD3)



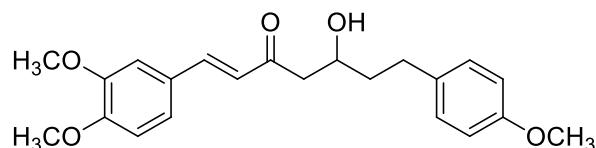

Yellow oil; yield 61%.  $^1\text{H}$  NMR (500 MHz,  $\text{CD}_3\text{OD}$ )  $\delta$  7.49 (d,  $J$  = 15 Hz, 1H), 7.14-7.10 (m, 2H), 7.04 (d,  $J$  = 5 Hz, 2H), 6.89 (d,  $J$  = 5 Hz, 1H), 6.74 (d,  $J$  = 5 Hz, 2H), 6.65 (d,  $J$  = 15 Hz, 1H), 4.07-4.02 (m, 1H), 3.78, (s, 6H), 3.66 (s, 3H), 2.82-2.69 (m, 2H), 2.68-2.52 (m, 2H), 1.72-1.68 (m, 2H);  $^{13}\text{C}$  NMR (125 MHz,  $\text{CD}_3\text{OD}$ )  $\delta$  201.8, 159.4, 153.2, 150.9, 145.4, 135.5, 130.5, 129.0, 125.7, 124.7, 115.0, 112.8, 111.89, 68.9, 56.6, 56.6, 55.8, 49.0, 40.6, 32.1. HRMS  $[\text{ESI}]^+$  calculated for  $\text{C}_{22}\text{H}_{27}\text{O}_5$ : 371.1853  $[\text{M} + \text{H}]^+$ ; found: 371.1849.

*(1E,4E)-1-(3,4-dimethoxyphenyl)-7-(4-methoxyphenyl)hepta-1,4-dien-3-one (MD3a)*

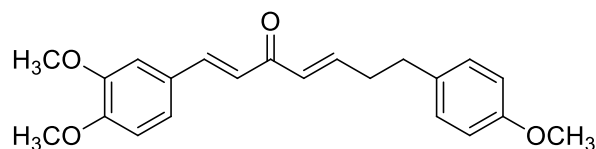

Yellow oil; yield 65.3%.  $^1\text{H}$  NMR (500 MHz,  $\text{CD}_3\text{OD}$ )  $\delta$  7.49 (d,  $J$  = 15 Hz, 1H), 7.17-7.13 (m, 1H), 7.12-7.11 (m, 1H), 7.03 (d,  $J$  = 5 Hz, 2H), 6.98-6.95 (m, 1H), 6.94-6.86 (m, 2H), 6.75-6.73 (m, 2H), 6.39 (d,  $J$  = 15 Hz, 1H), 3.78 (s, 3H), 3.77 (s, 3H), 3.65 (s, 3H), 2.65 (t,  $J$  = 7.5 Hz, 2H), 2.50-2.45 (m, 2H);  $^{13}\text{C}$  NMR (125 MHz,  $\text{CD}_3\text{OD}$ )  $\delta$  191.9, 159.7, 153.3, 151.0, 149.1, 145.6, 134.4, 130.8, 130.6, 129.3, 124.8, 123.8, 115.0, 112.8, 111.8, 56.7, 56.6, 55.8, 49.1, 36.0, 34.8. HRMS  $[\text{ESI}]^+$  calculated for  $\text{C}_{22}\text{H}_{25}\text{O}_4$ : 353.1658  $[\text{M} + \text{H}]^+$ ; found: 353.1654.

*(E)-5-hydroxy-7-(4-methoxyphenyl)-1-(3,4,5-trimethoxyphenyl)hept-1-en-3-one (MD4)*

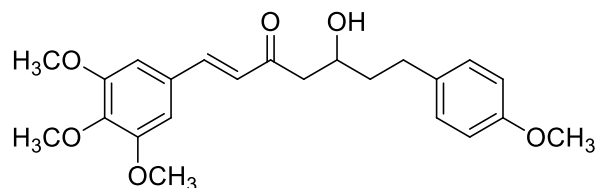

Yellow oil; yield 63.7%.  $^1\text{H}$  NMR (500 MHz,  $\text{CD}_3\text{OD}$ )  $\delta$  7.46 (d,  $J$  = 15 Hz, 1H), 7.03 (d,  $J$  = 5 Hz, 2H), 6.84 (s, 2H), 6.73-6.67 (m, 3H), 4.07-4.01 (m, 1H), 3.78 (s, 6H), 3.71 (s, 3H), 3.64 (s, 3H), 2.83-2.78 (m, 1H), 2.72-2.62 (m, 2H), 2.59-2.50 (m, 1H), 1.71-1.67 (m, 2H);  $^{13}\text{C}$  NMR (125 MHz,  $\text{MeOD}-d_4$ )  $\delta$  201.8, 159.4, 154.9, 145.2, 141.6, 135.4, 131.9, 130.5, 130.4, 127.2, 115.0, 107.2, 68.8, 61.4, 56.9, 56.6, 56.9, 55.8, 40.6, 32.1. HRMS  $[\text{ESI}]^+$  calculated for  $\text{C}_{23}\text{H}_{29}\text{O}_6$ : 401.1884  $[\text{M} + \text{H}]^+$ ; found: 401.1890.

*(1E,4E)-7-(4-methoxyphenyl)-1-(3,4,5-trimethoxyphenyl)hepta-1,4-dien-3-one (MD4a)*

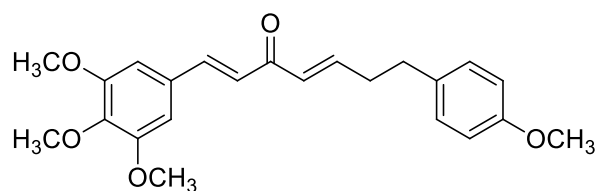

Yellow solid; yield 68.6%; m.p.: 59-60 °C.  $^1\text{H}$  NMR (500 MHz,  $\text{CDCl}_3$ )  $\delta$  7.50 (d,  $J$  = 15 Hz, 1H), 7.09 (d,  $J$  = 5 Hz, 1H), 7.02-6.96 (m, 1H), 6.83-6.76 (m, 5H), 6.43 (d,  $J$  = 15 Hz, 1H), 3.88 (s, 9H), 3.76 (s, 3H), 2.77-2.74 (m, 2H), 2.57-2.53 (m, 2H);  $^{13}\text{C}$  NMR (125 MHz,  $\text{CDCl}_3$ )  $\delta$  189.0, 158.0, 153.4, 146.9, 143.2, 140.3, 132.8, 130.2, 129.3, 129.3, 124.4, 113.9, 105.4, 61.0, 56.1, 55.2, 34.6, 33.6. HRMS [ESI] $^+$  calculated for  $\text{C}_{23}\text{H}_{27}\text{O}_5$ : 383.1756 [M + H] $^+$ ; found: 383.1753.

(*E*)-7-(3,4-dimethoxyphenyl)-5-hydroxy-1-(4-hydroxyphenyl)hept-1-en-3-one (MD5)

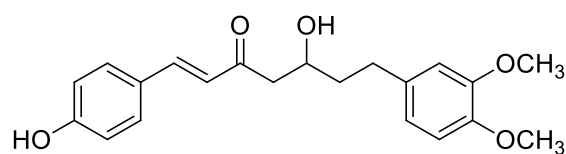

A yellowish oil; yield 60.2%.  $^1\text{H}$  NMR (500 MHz,  $\text{CD}_3\text{OD}$ )  $\delta$  7.46 (d,  $J$  = 15 Hz, 1H), 7.38 (d,  $J$  = 5 Hz, 2H), 6.74-6.72 (m, 4H), 6.66-6.65 (m, 1H), 6.56 (d,  $J$  = 15 Hz, 1H), 4.04-3.99 (m, 1H), 3.70 (s, 3H), 3.68 (s, 3H), 2.79-2.75 (m, 1H), 2.70-2.62 (m, 2H), 2.57-2.51 (m, 1H), 1.72-1.67 (m, 2H);  $^{13}\text{C}$  NMR (125 MHz,  $\text{CD}_3\text{OD}$ )  $\delta$  202.0, 161.7, 150.4, 148.7, 145.7, 136.5, 131.7, 127.3, 124.6, 121.8, 117.1, 113.7, 113.3, 68.9, 56.7, 56.5, 48.8, 40.4, 32.5. ESI-MS (positive,  $m/z$ ): 357.3 [M+H]

(1*E*,4*E*)-7-(3,4-dimethoxyphenyl)-1-(4-hydroxyphenyl)hepta-1,4-dien-3-one (MD5a)

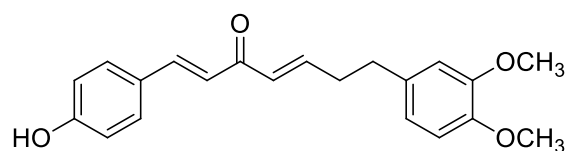

Yellow oil; yield 68%.  $^1\text{H}$  NMR (500 MHz,  $\text{CDCl}_3$ )  $\delta$  7.53 (d,  $J$  = 15 Hz, 1H), 7.38 (d,  $J$  = 5 Hz, 2H), 6.99-6.93 (m, 1H), 6.81 (d,  $J$  = 5 Hz, 2H), 6.75-6.72 (m, 2H), 6.67-6.65 (m, 2H), 6.39 (d,  $J$  = 15 Hz, 1H), 3.78 (s, 3H), 3.74 (s, 3H), 2.71-2.68 (m, 2H), 2.53-2.49 (m, 2H);  $^{13}\text{C}$  NMR (125 MHz,  $\text{CDCl}_3$ )  $\delta$  189.8, 158.7, 148.8, 147.3, 147.0, 143.9, 133.4, 130.3, 129.5, 126.9, 122.2, 120.2, 116.0, 111.7, 111.3, 55.9, 55.8, 34.6, 34.1. HRMS [ESI] $^+$  calculated for  $\text{C}_{21}\text{H}_{23}\text{O}_4$ : 339.1591 [M + H] $^+$ ; found: 339.1584.

(*E*)-7-(3,4-dimethoxyphenyl)-5-hydroxy-1-(4-methoxyphenyl)hept-1-en-3-one (MD6)

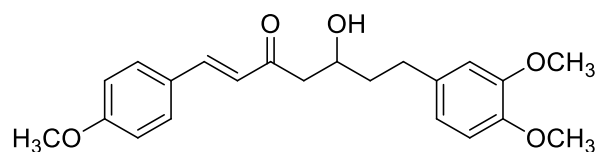

White solid; yield 61.3%; m.p.: 50-51 °C.  $^1\text{H}$  NMR (500 MHz,  $\text{CD}_3\text{OD}$ )  $\delta$  7.50-7.47 (m, 3H), 6.86

(m, 2H), 6.75-6.73 (m, 2H), 6.67-6.59 (m, 2H), 4.02 (brs, 1H), 3.73 (s, 3H), 3.71 (s, 3H), 3.68 (s, 3H), 2.81-2.76 (m, 1H), 2.71-2.63 (m, 2H), 2.57-2.51 (m, 1H), 1.70 (brs, 2H);  $^{13}\text{C}$  NMR (125 MHz,  $\text{CD}_3\text{OD}$ )  $\delta$  201.9, 163.6, 150.5, 148.8, 145.2, 136.5, 131.5, 128.6, 125.5, 121.9, 115.7, 113.7, 113.4, 68.9, 56.7, 56.6, 56.1, 49.02, 40.4, 32.5. HRMS  $[\text{ESI}]^+$  calculated for  $\text{C}_{22}\text{H}_{27}\text{O}_5$ : 371.1853  $[\text{M} + \text{H}]^+$ ; found: 371.1846..

(1E,4E)-7-(3,4-dimethoxyphenyl)-1-(4-methoxyphenyl)hepta-1,4-dien-3-one (MD6a)

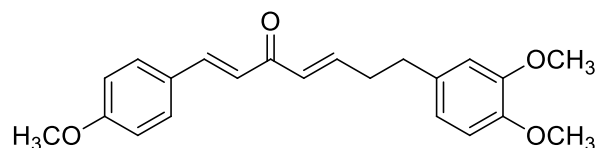

Yellow oil; yield 72.5%.  $^1\text{H}$  NMR (500 MHz,  $\text{CD}_3\text{OD}$ )  $\delta$  7.52-7.49 (m, 3H), 6.97-6.91 (m, 1H), 6.87-6.83 (m, 3H), 6.77-6.73 (m, 2H), 6.66 (d,  $J = 5$  Hz, 1H), 6.39 (d,  $J = 15$  Hz, 1H), 3.73 (s, 3H), 3.70 (s, 3H), 3.68 (s, 3H), 2.69-2.66 (m, 2H), 2.51-2.47 (m, 2H);  $^{13}\text{C}$  NMR (125 MHz,  $\text{CD}_3\text{OD}$ )  $\delta$  191.9, 163.6, 150.5, 149.0, 145.4, 135.5, 131.6, 130.8, 128.8, 123.6, 121.9, 115.7, 113.8, 113.3, 56.7, 56.6, 56.1, 35.9, 35.3. HRMS  $[\text{ESI}]^+$  calculated for  $\text{C}_{22}\text{H}_{25}\text{O}_4$ : 353.1747  $[\text{M} + \text{H}]^+$ ; found: 353.1738.

(E)-1,7-bis(3,4-dimethoxyphenyl)-5-hydroxyhept-1-en-3-one (MD7)

Reference compound [12]

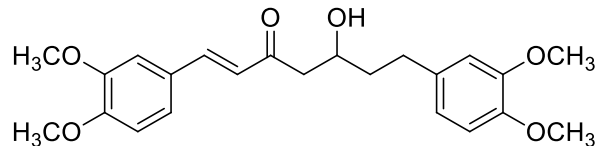

Known compound; yellow solid; yield 66.1%; m.p.: 87-88 °C.  $^1\text{H}$  NMR (500 MHz,  $\text{CD}_3\text{OD}$ )  $\delta$  7.47 (d,  $J = 15$  Hz, 1H), 7.12-7.08 (m, 2H), 6.87 (d,  $J = 5$  Hz, 1H), 6.74-6.72 (m, 2H), 6.66-6.61 (m, 2H), 4.04-4.00 (m, 1H), 3.76 (s, 6H), 3.70 (s, 3H), 3.67 (s, 3H), 2.80-2.76 (m, 1H), 2.71-2.62 (m, 2H), 2.59-2.50 (m, 1H), 1.72-1.66 (m, 2H);  $^{13}\text{C}$  NMR (125 MHz,  $\text{CD}_3\text{OD}$ )  $\delta$  201.9, 153.3, 151.0, 150.5, 148.8, 145.4, 136.5, 129.1, 125.7, 124.7, 121.9, 113.7, 113.4, 112.8, 111.8, 68.9, 56.7, 56.6, 56.5, 49.07, 40.5, 32.5. HRMS  $[\text{ESI}]^+$  calculated for  $\text{C}_{23}\text{H}_{29}\text{O}_6$ : 401.1959  $[\text{M} + \text{H}]^+$ ; found: 401.1948.

(1E,4E)-1,7-bis(3,4-dimethoxyphenyl)hepta-1,4-dien-3-one (MD7a)

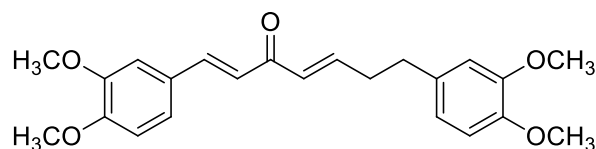

Yellow oil; yield 70.5%.  $^1\text{H}$  NMR (500 MHz,  $\text{CD}_3\text{OD}$ )  $\delta$  7.51 (d,  $J = 15$  Hz, 1H), 7.18 (s, 1H), 7.13 (d,  $J = 5$  Hz, 1H), 6.99-6.94 (m, 1H), 6.90-6.87 (m, 2H), 6.78-6.74 (m, 2H), 6.68 (d,  $J = 5$  Hz, 1H), 6.41 (d,  $J = 15$  Hz, 1H), 3.79(s, 3H), 3.78 (s, 3H), 3.72 (s, 3H), 3.70 (s, 3H), 2.69 (t,  $J = 7.5$  Hz, 2H),

2.55-2.49 (m, 2H);  $^{13}\text{C}$  NMR (125 MHz,  $\text{CD}_3\text{OD}$ )  $\delta$  191.8, 153.3, 151.0, 150.6, 149.1, 149.0, 145.6, 135.5, 130.9, 129.3, 124.8, 123.9, 121.9, 113.8, 113.3, 112.8, 111.9, 56.7, 56.6, 35.9, 35.2. HRMS  $[\text{ESI}]^+$  calculated for  $\text{C}_{23}\text{H}_{26}\text{O}_5$ : 382.1780  $[\text{M} + \text{H}]^+$ ; found: 382.1779.

*(E)*-7-(3,4-dimethoxyphenyl)-5-hydroxy-1-(3,4,5-trimethoxyphenyl)hept-1-en-3-one (MD8)

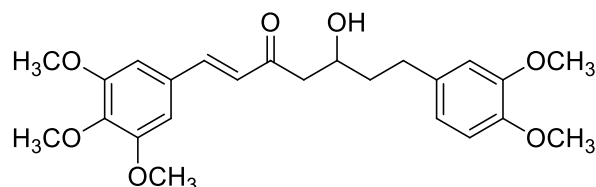

Colorless oil; yield 62%.  $^1\text{H}$  NMR (500 MHz,  $\text{CD}_3\text{OD}$ )  $\delta$  7.47 (d,  $J = 15$  Hz, 1H), 6.86 (s, 2H), 6.76-6.67 (m, 4H), 4.08-4.00 (m, 1H), 3.79 (s, 3H), 3.73 (s, 3H), 3.69 (s, 9H), 2.84-2.80 (m, 1H), 2.75-2.65 (m, 2H), 2.61-2.53 (m, 1H), 1.75-1.70 (m, 2H);  $^{13}\text{C}$  NMR (125 MHz,  $\text{CD}_3\text{OD}$ )  $\delta$  201.7, 154.9, 150.5, 148.8, 145.1, 141.7, 136.5, 131.8, 127.2, 121.8, 113.8, 113.4, 107.2, 68.8, 61.3, 56.9, 56.7, 56.5, 49.1, 40.4, 32.5. HRMS  $[\text{ESI}]^+$  calculated for  $\text{C}_{24}\text{H}_{31}\text{O}_7$ : 431.2064  $[\text{M} + \text{H}]^+$ ; found: 431.2055.

*(1E,4E)*-7-(3,4-dimethoxyphenyl)-1-(3,4,5-trimethoxyphenyl)hepta-1,4-dien-3-one (MD8a)

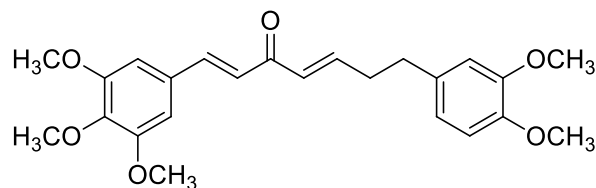

Yellow solid; yield 65.6%; m.p.: 86-87 °C.  $^1\text{H}$  NMR (500 MHz,  $\text{CD}_3\text{OD}$ )  $\delta$  7.46 (d,  $J = 15$  Hz, 1H), 7.01-6.92 (m, 2H), 6.85 (s, 2H), 6.75-6.72 (m, 2H), 6.64 (m, 1H), 6.39 (d,  $J = 15$  Hz, 1H), 3.77 (s, 6H), 3.71 (s, 3H), 3.70 (s, 3H), 3.69 (s, 3H), 2.67-2.64 (m, 2H), 2.49-2.45 (m, 2H);  $^{13}\text{C}$  NMR (125 MHz,  $\text{CD}_3\text{OD}$ )  $\delta$  191.6, 154.9, 150.5, 149.3, 149.0, 145.3, 141.7, 135.4, 132.0, 130.8, 125.3, 121.9, 113.7, 113.3, 107.2, 61.3, 56.8, 56.6, 56.5, 35.8, 35.2. HRMS  $[\text{ESI}]^+$  calculated for  $\text{C}_{24}\text{H}_{29}\text{O}_6$ : 413.1959  $[\text{M} + \text{H}]^+$ ; found: 413.1954.

*(E)*-5-hydroxy-1-(4-hydroxyphenyl)-7-(3,4,5-trimethoxyphenyl)hept-1-en-3-one (MD9)

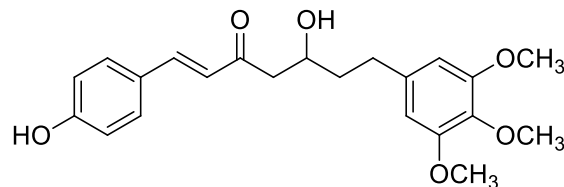

Yellow oil; yield 73 %.  $^1\text{H}$  NMR (500 MHz,  $\text{CD}_3\text{OD}$ )  $\delta$  7.50-7.39 (m, 3H), 6.73 (d,  $J = 5$  Hz, 2H), 6.58 (d,  $J = 15$  Hz, 1H), 6.43 (s, 2H), 4.05-4.00 (m, 1H), 3.71 (s, 6H), 3.63 (s, 3H), 2.81-2.77 (m, 1H), 2.72-2.64 (m, 2H), 2.58-2.52 (m, 1H), 1.75-1.67 (m, 2H);  $^{13}\text{C}$  NMR (125 MHz,  $\text{CD}_3\text{OD}$ )  $\delta$  202.0, 161.8, 154.5, 145.7, 139.8, 137.3, 131.7, 127.3, 124.6, 117.1, 106.9, 68.9, 61.3, 56.7, 48.9, 40.2, 33.3. HRMS  $[\text{ESI}]^+$  calculated for  $\text{C}_{22}\text{H}_{27}\text{O}_6$ : 387.1802  $[\text{M} + \text{H}]^+$ ; found: 387.1792.

(1E,4E)-1-(4-hydroxyphenyl)-7-(3,4,5-trimethoxyphenyl)hepta-1,4-dien-3-one (MD9a)

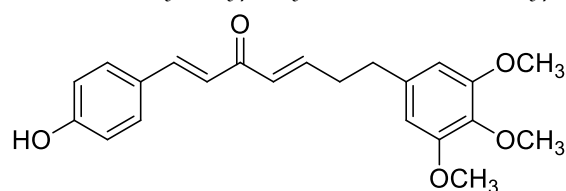

Yellow oil; yield 77 %.  $^1\text{H}$  NMR (500 MHz,  $\text{CDCl}_3$ )  $\delta$  7.58 (d,  $J$  = 15 Hz, 1H), 7.44 (d,  $J$  = 5 Hz, 2H), 7.03-6.97 (m, 1H), 6.85 (d,  $J$  = 5 Hz, 2H), 6.79 (d,  $J$  = 15 Hz, 1H), 6.45 (d,  $J$  = 15 Hz, 1H), 6.39-6.37 (m, 2H), 3.82 (s, 6H), 3.81 (s, 3H), 2.76-2.73 (m, 2H), 2.59-2.55 (m, 2H);  $^{13}\text{C}$  NMR (125 MHz,  $\text{CDCl}_3$ )  $\delta$  189.5, 158.3, 153.1, 146.5, 143.5, 136.6, 136.3, 130.3, 129.6, 127.2, 122.4, 116.0, 105.3, 60.8, 56.0, 34.9, 34.6. HRMS [ESI] $^+$  calculated for  $\text{C}_{22}\text{H}_{25}\text{O}_5$ : 369.1697 [M + H] $^+$ ; found: 369.1687.

(E)-5-hydroxy-1-(4-methoxyphenyl)-7-(3,4,5-trimethoxyphenyl)hept-1-en-3-one (MD10)

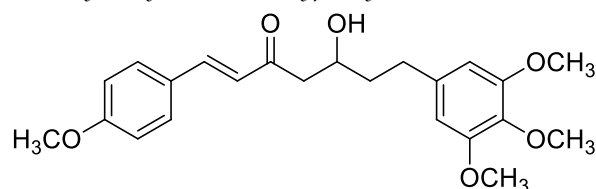

Yellow oil; yield 64 %.  $^1\text{H}$  NMR (500 MHz,  $\text{CD}_3\text{OD}$ )  $\delta$  7.53-7.49 (m, 3H), 6.88 (d,  $J$  = 5 Hz, 2H), 6.64 (d,  $J$  = 15 Hz, 1H), 6.44 (s, 2H), 4.08-4.00 (m, 1H), 3.75 (s, 3H), 3.72 (m, 6H), 3.63 (s, 3H), 2.84-2.80 (m, 1H), 2.79-2.65 (m, 2H), 2.60-2.54 (m, 1H), 1.79-1.73 (m, 2H);  $^{13}\text{C}$  NMR (125 MHz,  $\text{CD}_3\text{OD}$ )  $\delta$  201.9, 163.6, 154.5, 145.2, 139.8, 137.3, 133.4, 131.5, 128.6, 125.5, 115.7, 106.9, 68.8, 61.3, 56.7, 56.1, 49.0, 40.3, 33.3. HRMS [ESI] $^+$  calculated for  $\text{C}_{23}\text{H}_{29}\text{O}_6$ : 401.1959 [M + H] $^+$ ; found: 401.1956.

(1E,4E)-1-(4-methoxyphenyl)-7-(3,4,5-trimethoxyphenyl)hepta-1,4-dien-3-one (MD10a)

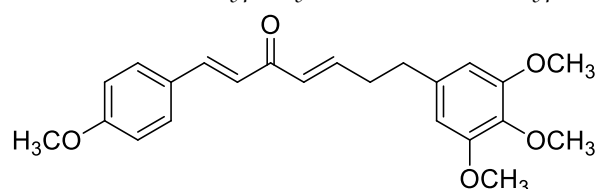

Yellow oil; yield 65.7%.  $^1\text{H}$  NMR (500 MHz,  $\text{CDCl}_3$ )  $\delta$  7.58 (d,  $J$  = 15 Hz, 1H), 7.50 (d,  $J$  = 5 Hz, 2H), 7.02-6.96 (m, 1H), 6.91-6.88 (m, 2H), 6.80 (d,  $J$  = 15 Hz, 1H), 6.44 (d,  $J$  = 15 Hz, 1H), 6.39 (s, 2H), 3.82 (s, 9H), 3.80 (s, 3H), 2.76-2.73 (m, 2H), 2.59-2.55 (m, 2H);  $^{13}\text{C}$  NMR (125 MHz,  $\text{CDCl}_3$ )  $\delta$  189.1, 161.6, 153.1, 146.1, 143.1, 136.6, 130.0, 129.7, 127.4, 122.7, 114.4, 105.3, 60.8, 56.0, 55.3, 34.9, 34.4. HRMS [ESI] $^+$  calculated for  $\text{C}_{23}\text{H}_{27}\text{O}_5$ : 383.1853 [M + H] $^+$ ; found: 383.1844.

(E)-1-(3,4-dimethoxyphenyl)-5-hydroxy-7-(3,4,5-trimethoxyphenyl) hept-1-en-3-one (MD11)

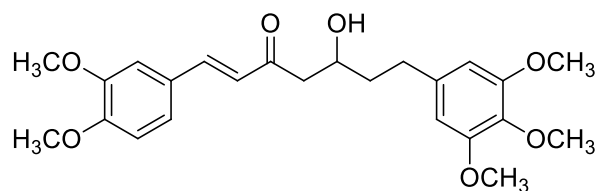

Yellow oil; yield 62.4%.  $^1\text{H}$  NMR (500 MHz,  $\text{CD}_3\text{OD}$ )  $\delta$  7.49 (d,  $J$  = 15 Hz, 1H), 7.14-7.10 (m, 2H), 6.88 (d,  $J$  = 5 Hz, 1H), 6.66-6.63 (m, 1H), 6.44-6.40 (m, 2H), 4.05-4.03 (m, 1H), 3.77-3.70 (m, 12H), 3.63 (s, 3H), 2.83-2.79 (m, 1H), 2.74-2.66 (m, 2H), 2.58-2.56 (m, 1H), 1.74-1.71 (m, 2H);  $^{13}\text{C}$  NMR (125 MHz,  $\text{CD}_3\text{OD}$ )  $\delta$  201.9, 154.5, 153.3, 150.9, 145.4, 139.8, 137.3, 129.0, 125.7, 124.7, 112.8, 111.9, 106.9, 68.8, 61.3, 56.7, 56.6, 49.05, 40.3, 33.3. HRMS [ESI] $^+$  calculated for  $\text{C}_{24}\text{H}_{31}\text{O}_7$ : 431.2064 [M + H] $^+$ ; found: 431.2054.

(1E,4E)-1-(3,4-dimethoxyphenyl)-7-(3,4,5-trimethoxyphenyl)hepta-1,4-dien-3-one (MD11a)

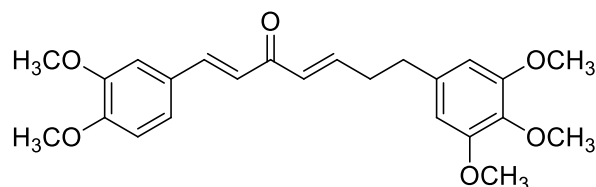

Yellow oil; yield 67.5%.  $^1\text{H}$  NMR (500 MHz,  $\text{CDCl}_3$ )  $\delta$  7.55 (d,  $J$  = 15 Hz, 1H), 7.14-7.12 (m, 1H), 7.06 (s, 1H), 7.02-6.98 (m, 1H), 6.85 (d,  $J$  = 5 Hz, 1H), 6.78 (d,  $J$  = 15 Hz, 1H), 6.46 (d,  $J$  = 15 Hz, 1H), 6.39 (s, 2H), 3.90 (s, 6H), 3.82 (s, 6H), 3.80 (s, 3H), 2.76-2.73 (m, 2H), 2.59-2.55 (m, 2H);  $^{13}\text{C}$  NMR (125 MHz,  $\text{CDCl}_3$ )  $\delta$  189.0, 153.1, 151.3, 149.2, 146.1, 143.3, 136.6, 129.4, 127.6, 123.1, 123.0, 111.0, 109.8, 105.3, 60.8, 56.0, 55.9, 55.9, 34.9, 34.4. HRMS [ESI] $^+$  calculated for  $\text{C}_{24}\text{H}_{29}\text{O}_6$ : 413.1959 [M + H] $^+$ ; found: 413.1951.

(E)-5-hydroxy-1,7-bis(3,4,5-trimethoxyphenyl)hept-1-en-3-one (MD12)

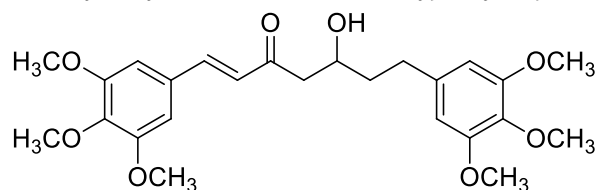

Yellow oil; yield 69.1%.  $^1\text{H}$  NMR (500 MHz,  $\text{CD}_3\text{OD}$ )  $\delta$  7.48 (d,  $J$  = 15 Hz, 1H), 6.86 (s, 2H), 6.71 (d,  $J$  = 15 Hz, 1H), 6.45 (s, 2H), 4.07-4.05 (m, 1H), 3.79 (s, 6H), 3.73 (s, 9H), 3.64 (s, 3H), 2.85-2.81 (m, 1H), 2.76-2.66 (m, 2H), 2.62-2.54 (m, 1H), 1.77-1.70 (m, 2H);  $^{13}\text{C}$  NMR (125 MHz,  $\text{CD}_3\text{OD}$ )  $\delta$  201.7, 155.0, 154.5, 145.1, 141.7, 139.8, 137.3, 131.9, 127.2, 107.2, 106.9, 68.7, 61.3, 61.2, 56.9, 56.7, 49.1, 40.3, 33.6. HRMS [ESI] $^+$  calculated for  $\text{C}_{25}\text{H}_{33}\text{O}_8$ : 461.2170 [M + H] $^+$ ; found: 461.2161.

(1E,4E)-1,7-bis(3,4,5-trimethoxyphenyl)hepta-1,4-dien-3-one (MD12a)

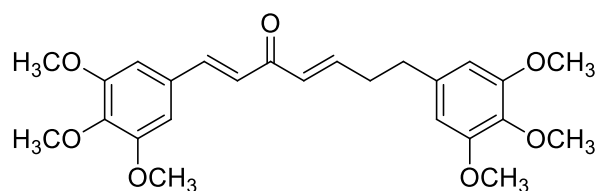

Yellow solid; yield 66.5%; m.p.: 98-99 °C.  $^1\text{H}$  NMR (500 MHz,  $\text{CDCl}_3$ )  $\delta$  7.51 (d,  $J$  = 15 Hz, 1H), 7.04-6.98 (m, 1H), 6.81-6.77 (m, 2H), 6.46 (d,  $J$  = 15 Hz, 1H), 6.39 (s, 2H), 3.88 (s, 6H), 3.86 (s, 3H), 3.82 (s, 6H), 3.80 (m, 3H), 2.77-2.74 (m, 2H), 2.60-2.56 (m, 2H);  $^{13}\text{C}$  NMR (125 MHz,  $\text{CDCl}_3$ )  $\delta$  188.9, 153.4, 153.2, 146.5, 143.3, 140.3, 136.5, 136.4, 130.1, 129.3, 124.5, 105.5, 105.3, 60.9, 60.8, 56.1, 56.0, 55.9, 34.9, 34.4. HRMS  $[\text{ESI}]^+$  calculated for  $\text{C}_{25}\text{H}_{31}\text{O}_7$ : 443.2064  $[\text{M} + \text{H}]^+$ ; found: 443.2058.

*(1E,4Z)-5-hydroxy-7-(4-methoxyphenyl)-1-(3,4,5-trimethoxyphenyl)hepta-1,4-dien-3-one (MD13)*

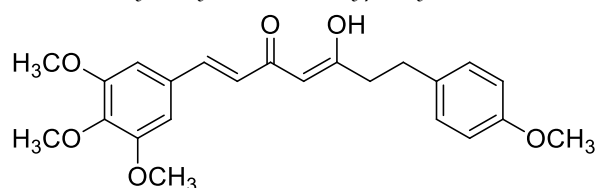

Yellow oil; yield 69.3%; m.p.: 98-99 °C.  $^1\text{H}$  NMR (500 MHz,  $\text{DMSO}-d_6$ )  $\delta$  7.48 (d,  $J$  = 15 Hz, 1H), 7.15-7.14 (m, 2H), 7.02 (s, 2H), 6.84-6.78 (m, 3H), 5.90 (s, 1H), 5.73 (s, 1H), 3.81 (s, 6H), 3.70 (s, 6H), 2.83 (brs, 2H), 2.71-2.70 (m, 2H);  $^{13}\text{C}$  NMR (125 MHz,  $\text{DMSO}-d_6$ )  $\delta$  200.2, 176.4, 157.6, 153.1, 139.5, 132.6, 130.4, 129.2, 122.3, 113.8, 105.7, 100.7, 60.1, 56.0, 55.0, 41.4, 29.63. HRMS  $[\text{ESI}]^+$  calculated for  $\text{C}_{23}\text{H}_{27}\text{O}_6$ : 399.1802  $[\text{M} + \text{H}]^+$ ; found: 399.1791.

# NMR Spectra <sup>1</sup>H and <sup>13</sup>C

## Compound 1

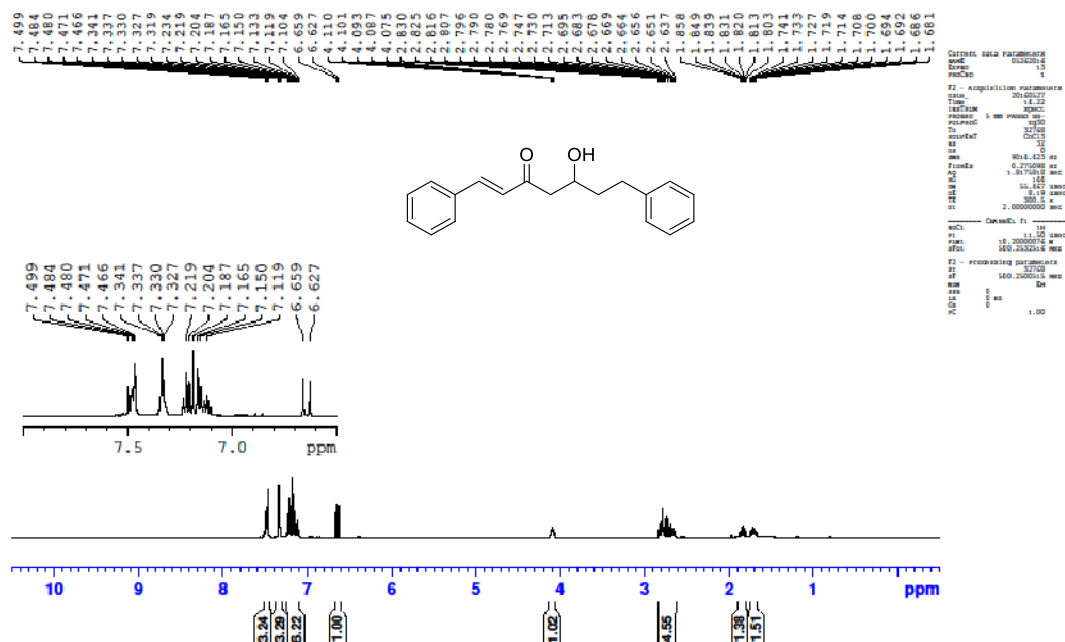



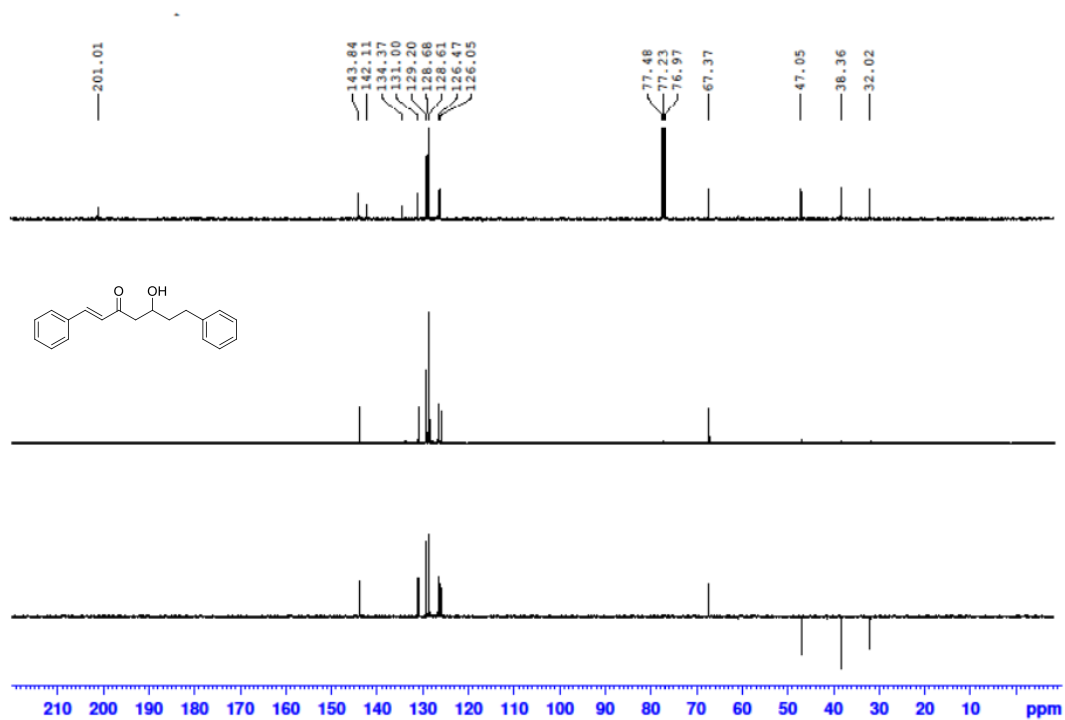

Compound 1a

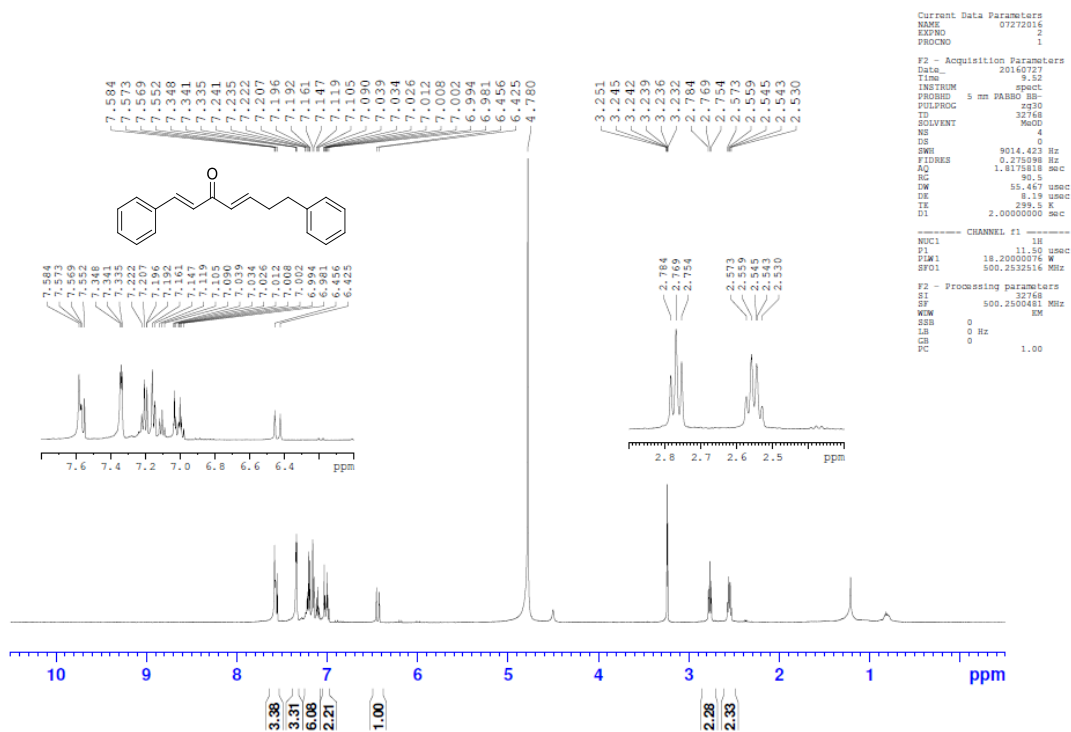

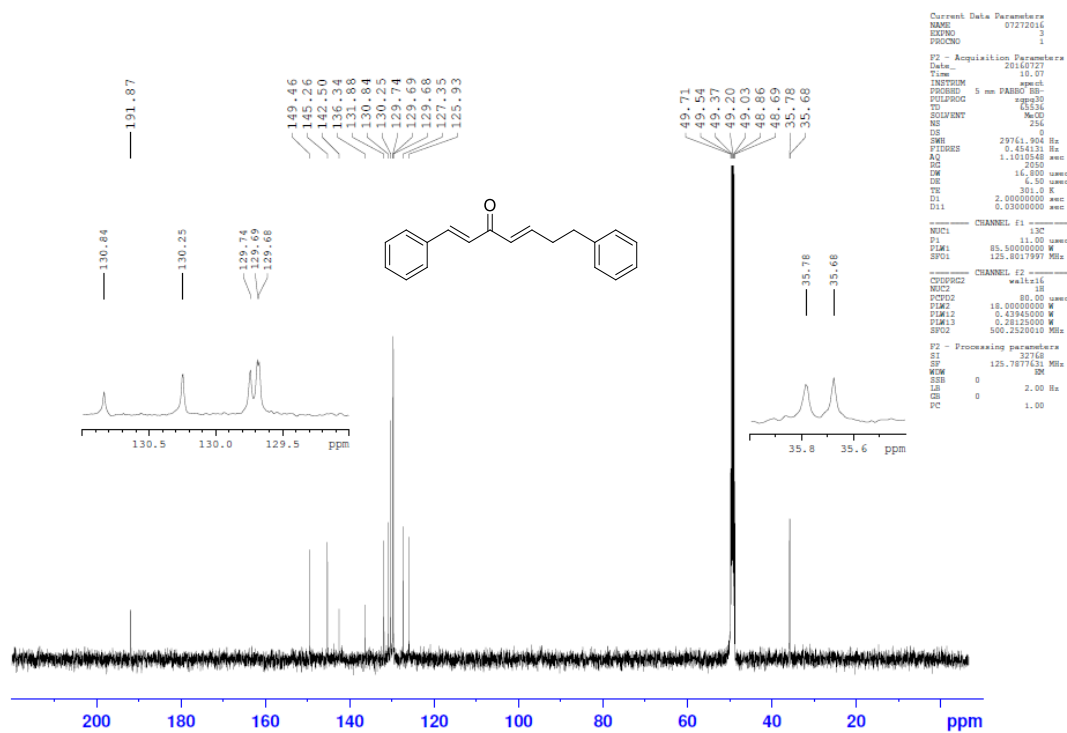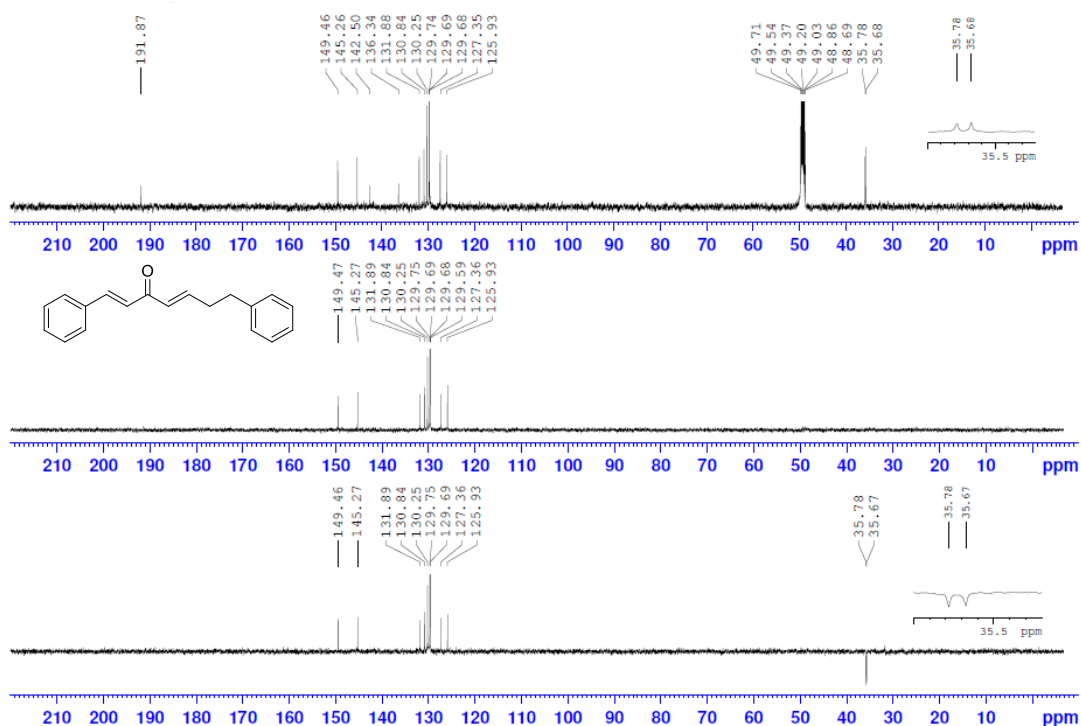

Compound 2

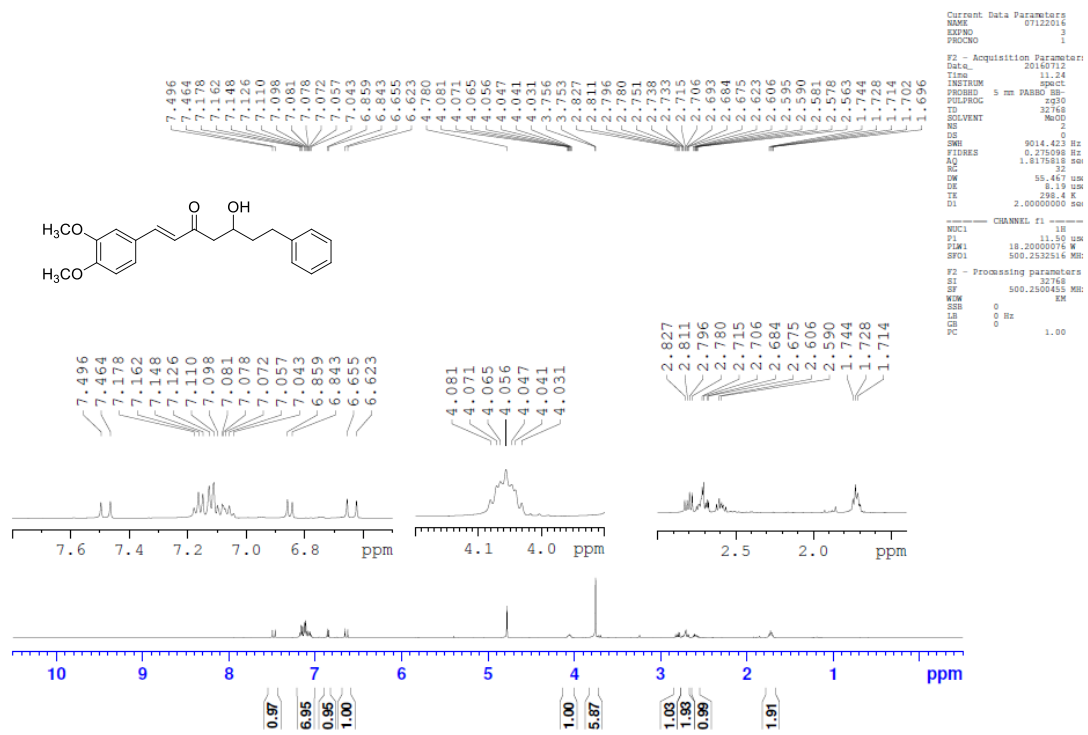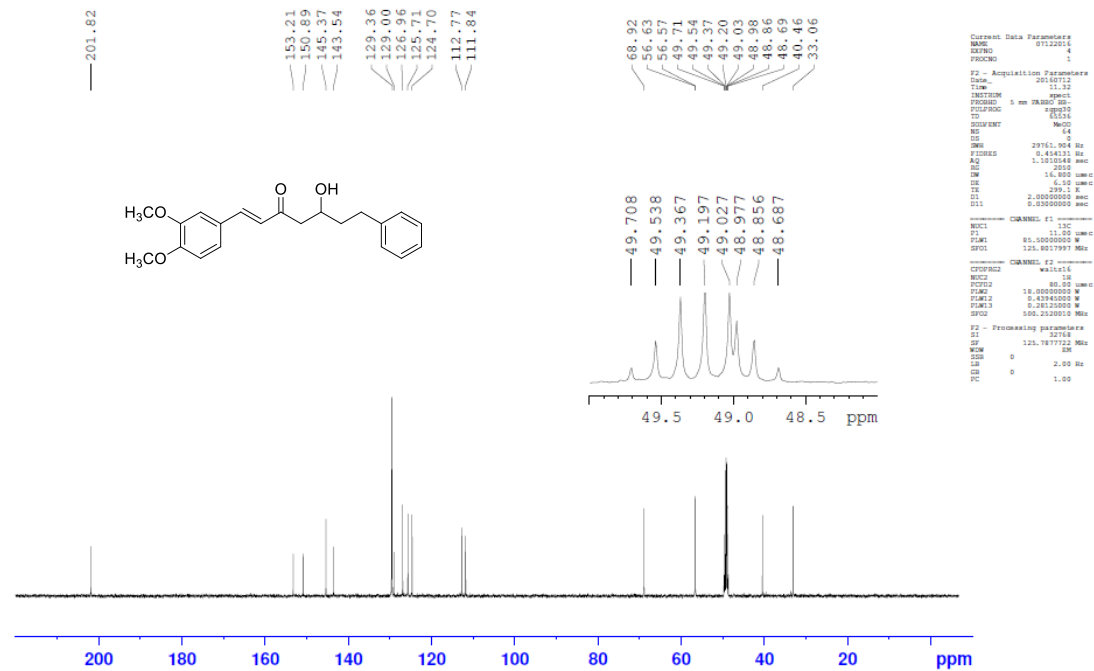



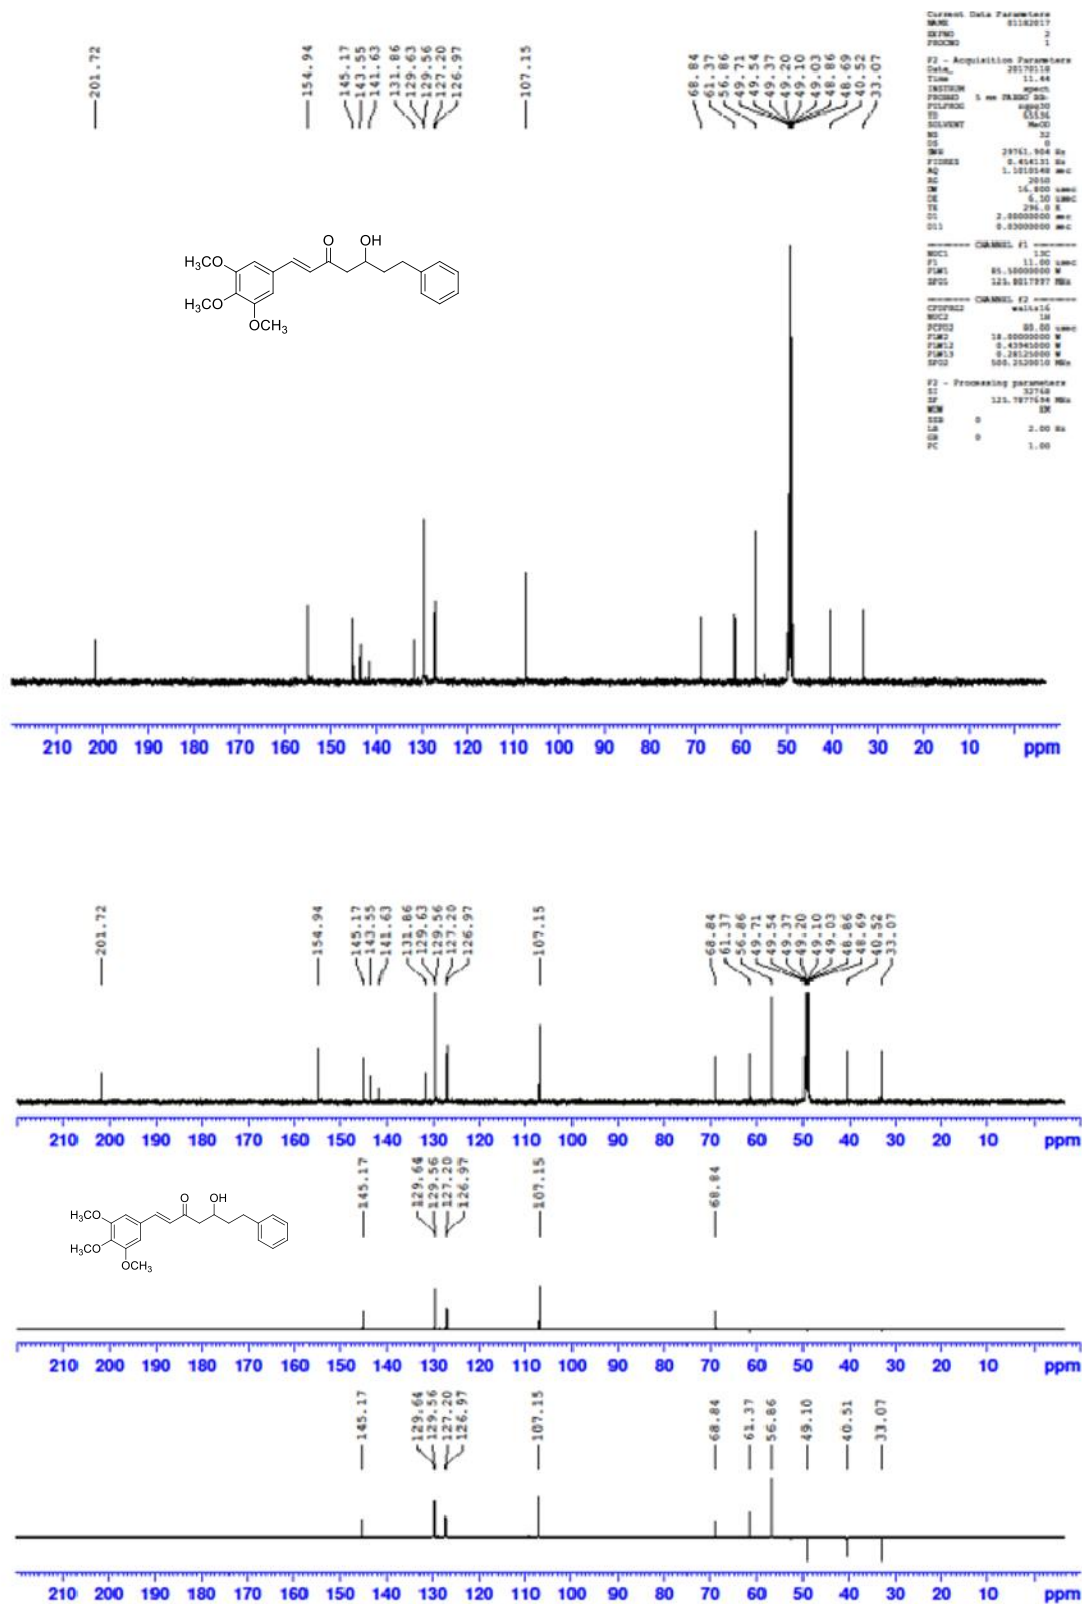

Compound 3a

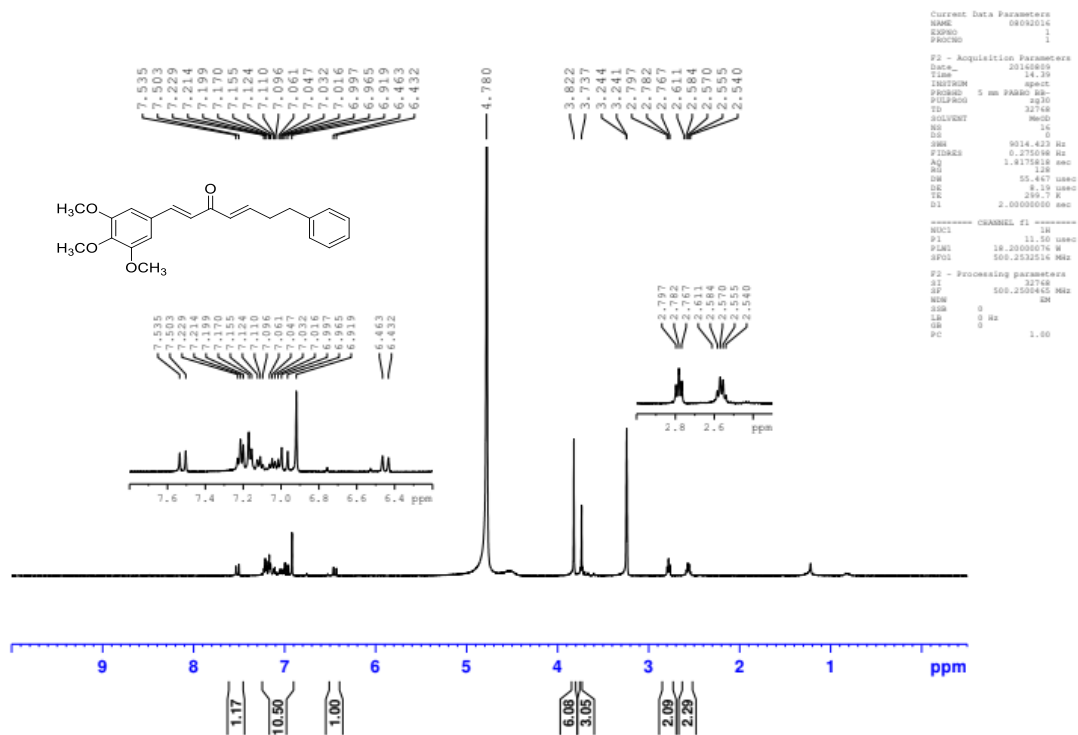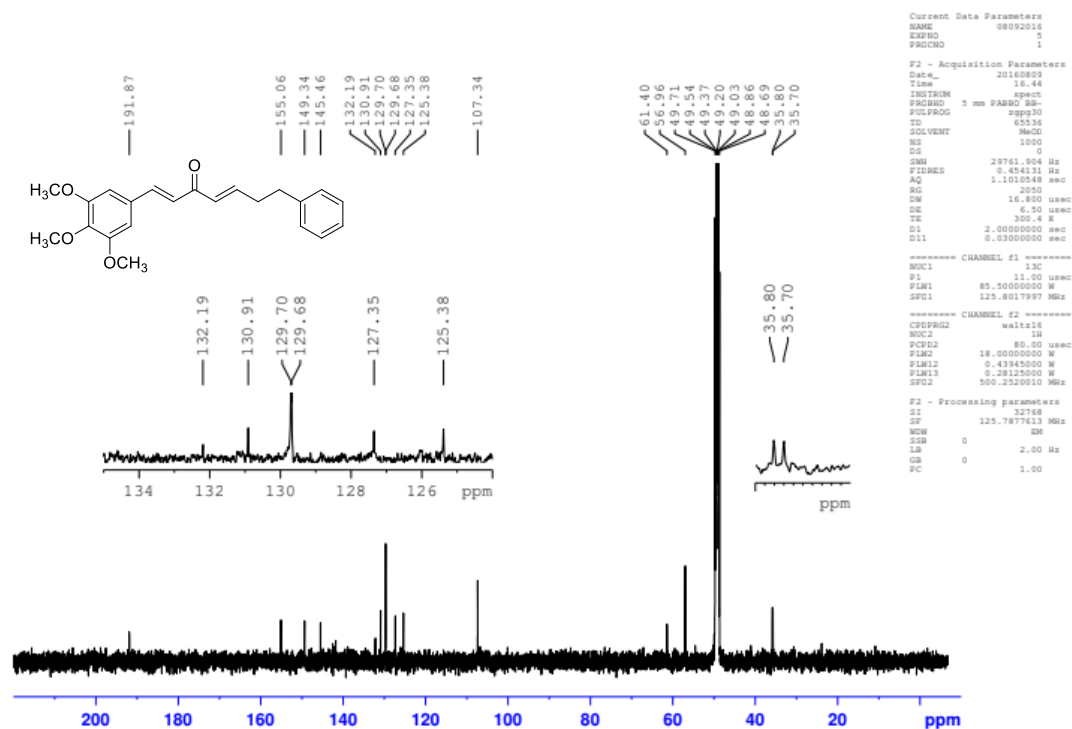



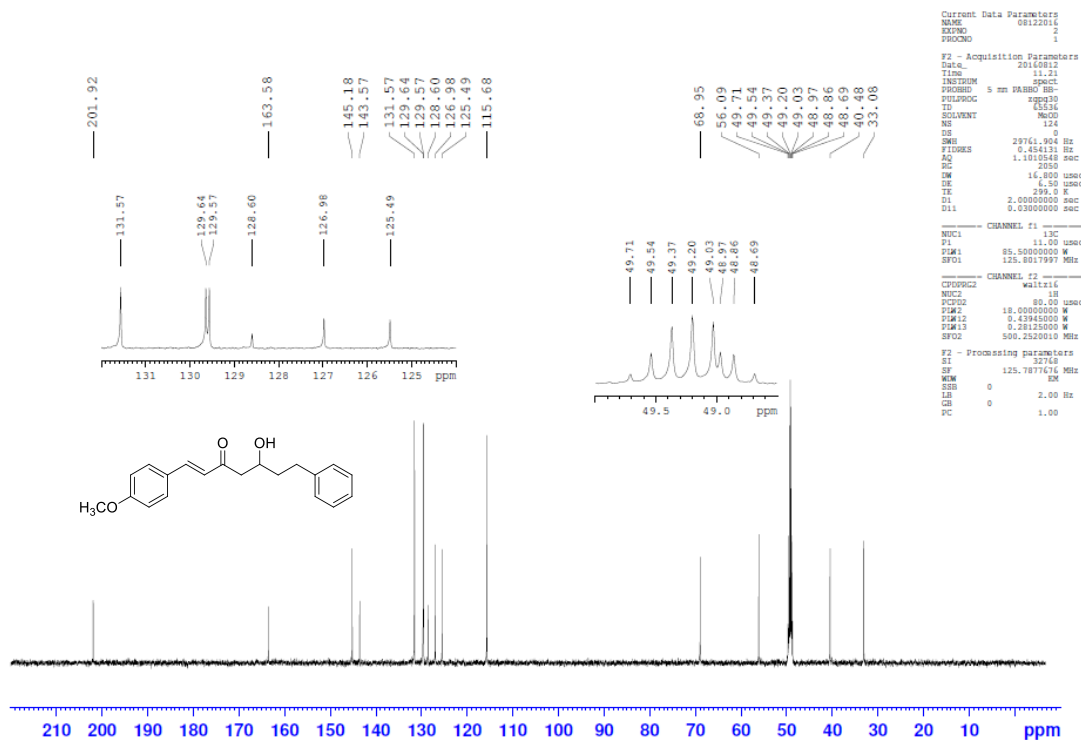

Current Data Parameters  
NAME 08122016  
EXPNO 1  
PROCNO 1  
F2 - Acquisition Parameters  
Date\_ 20160612  
Time 11.21  
INSTRUM spect  
PROBHD 5 mm QNP1H  
PULPROG zgpg30  
TD 65536  
SOLVENT Me2O  
NS 124  
DS 0  
SFO1 29761.904 Hz  
FIDRES 0.454131 Hz  
AQ 1.1810540 sec  
RG 2050  
SW 16.000 USMC  
LB 6.50 USMC  
JT 299.0 K  
D1 2.00000000 sec  
D11 0.03000000 sec

CHANNEL F1  
NUC1 13C  
P1 11.00 USMC  
PL1 85.50000000 W  
SFO1 125.6017997 MHz

CHANNEL F2  
CPDPRG2 waltz16  
NUC2 1H  
P2 90.00 USMC  
PL2 18.00000000 W  
PL12 0.43840000 W  
PL13 0.28125000 W  
SFO2 500.2520010 MHz

F2 - Processing parameters  
SI 32768  
SF 125.7677616 MHz  
WDW EM  
SSB 0  
LB 2.00 Hz  
GB 0  
PC 1.00

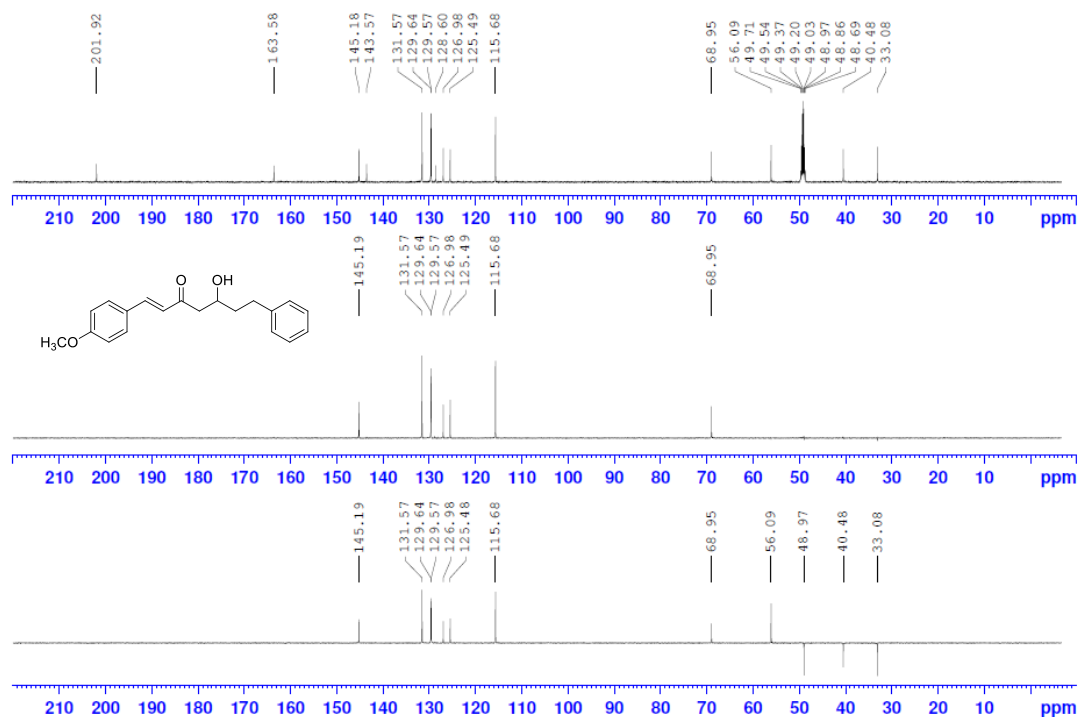

Compound 4a



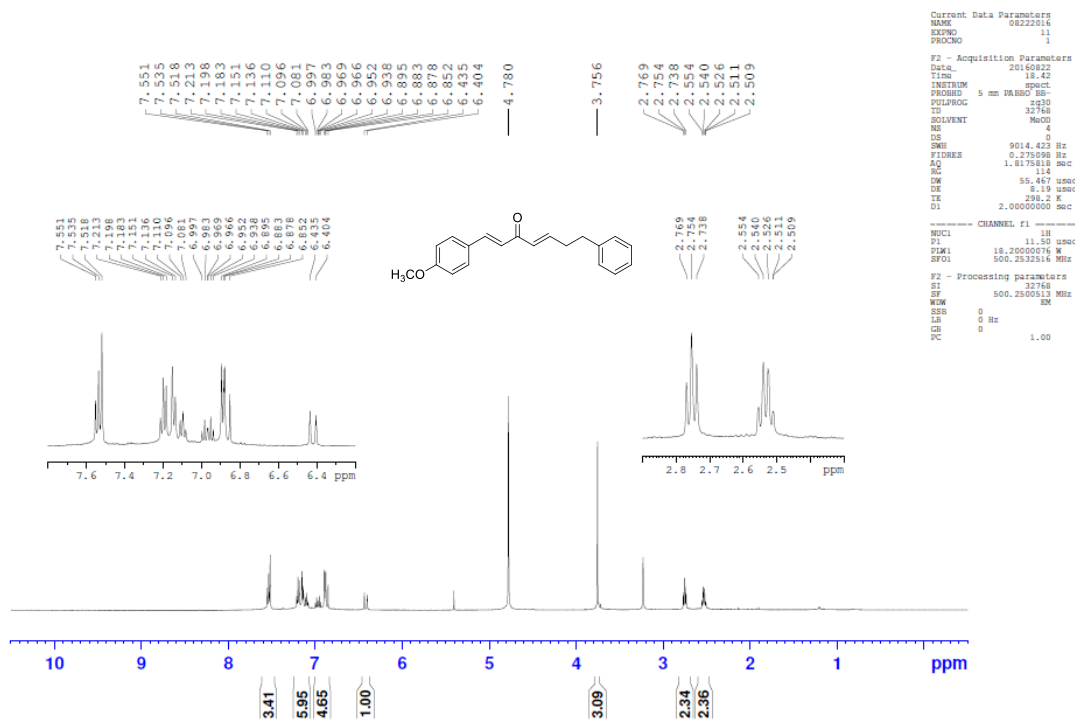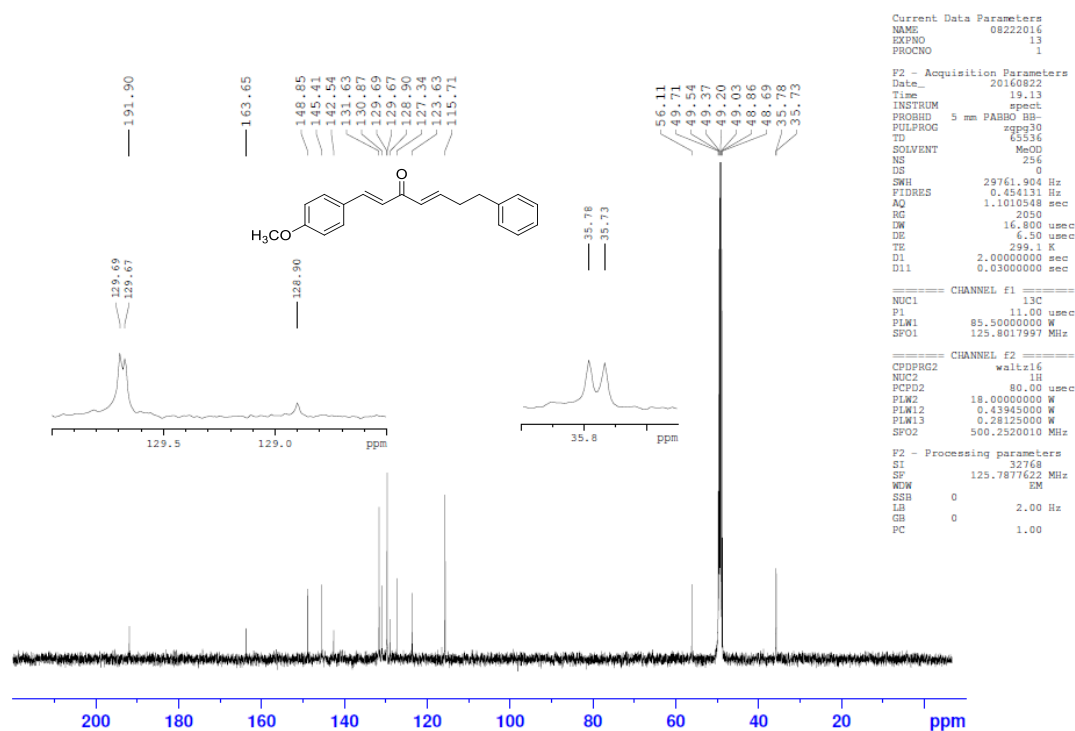



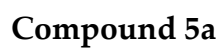

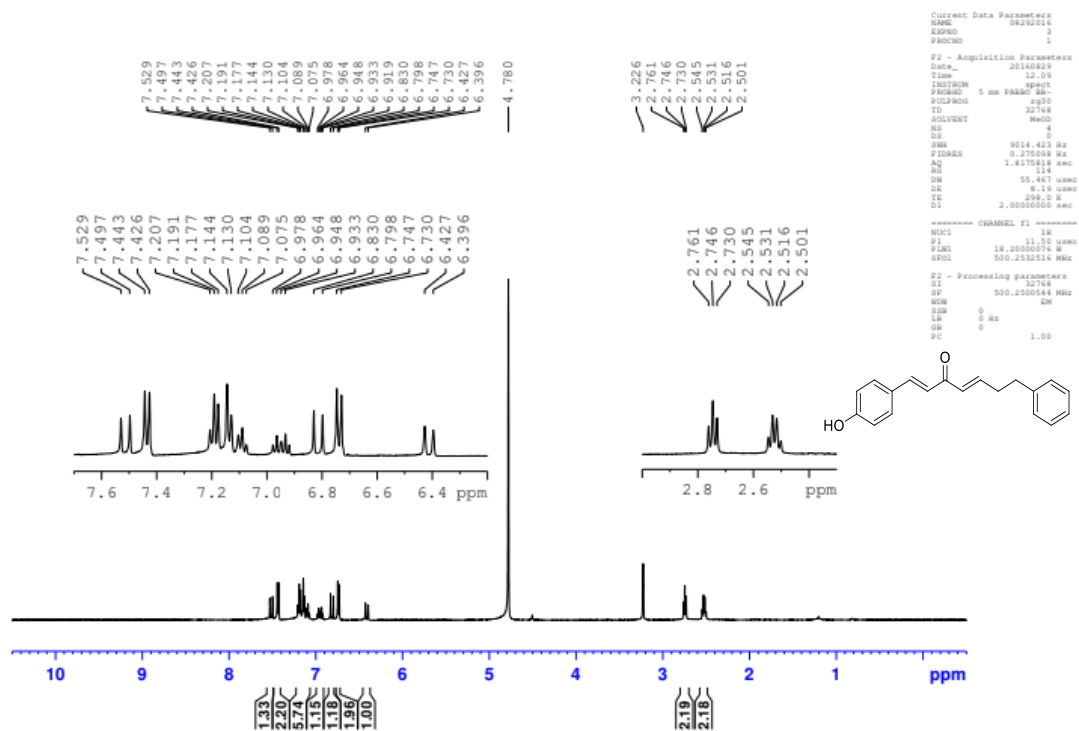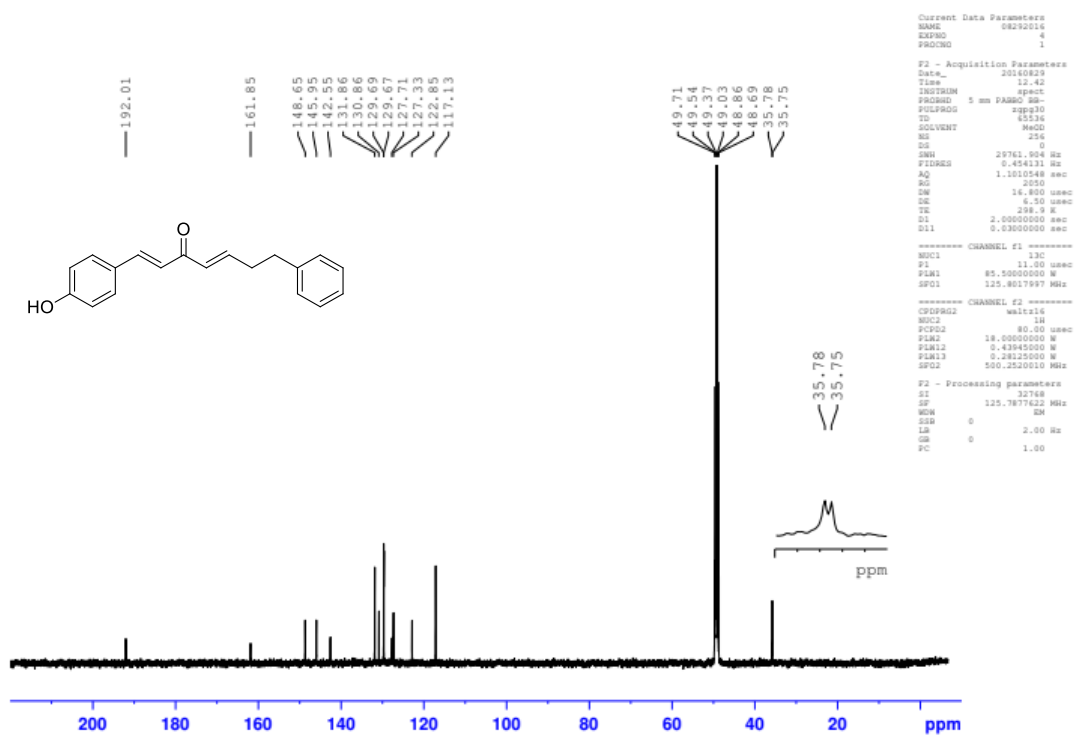

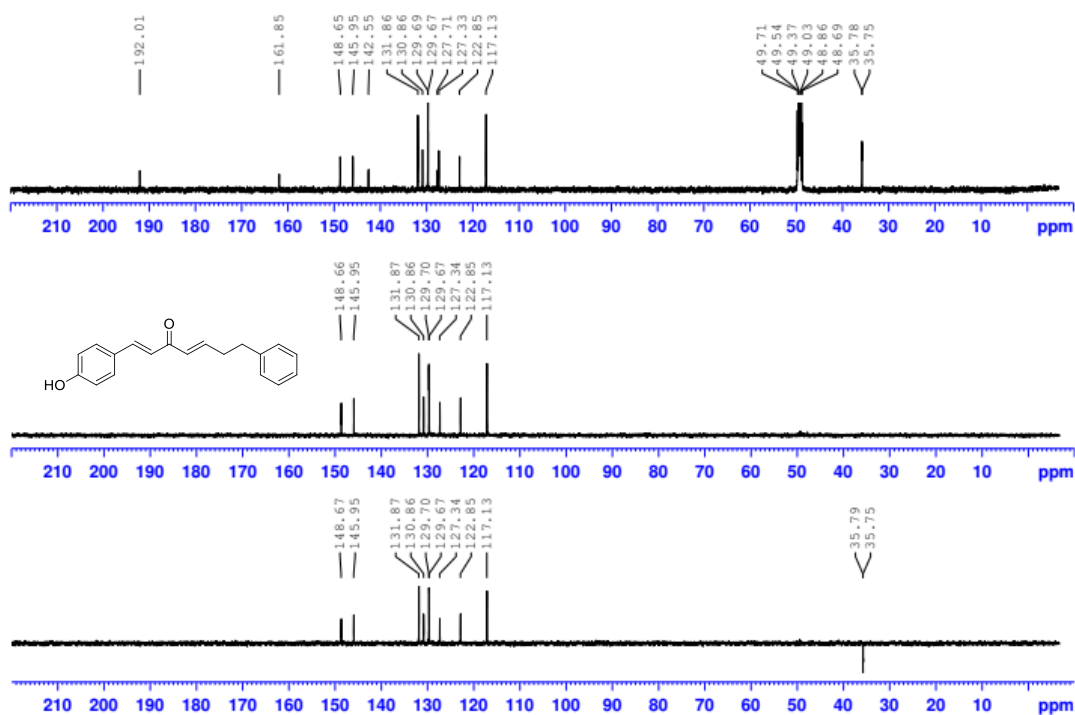

## Compound 6

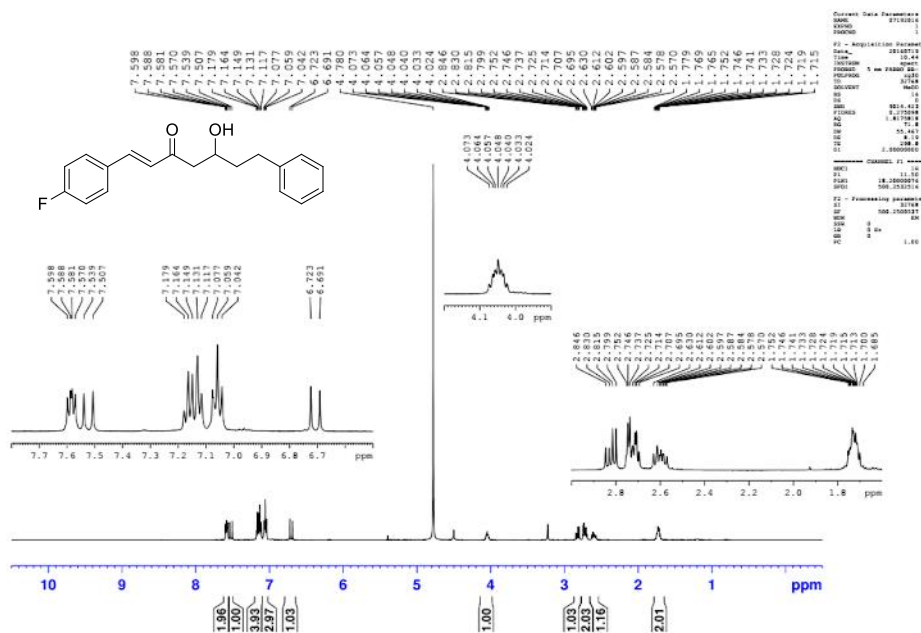

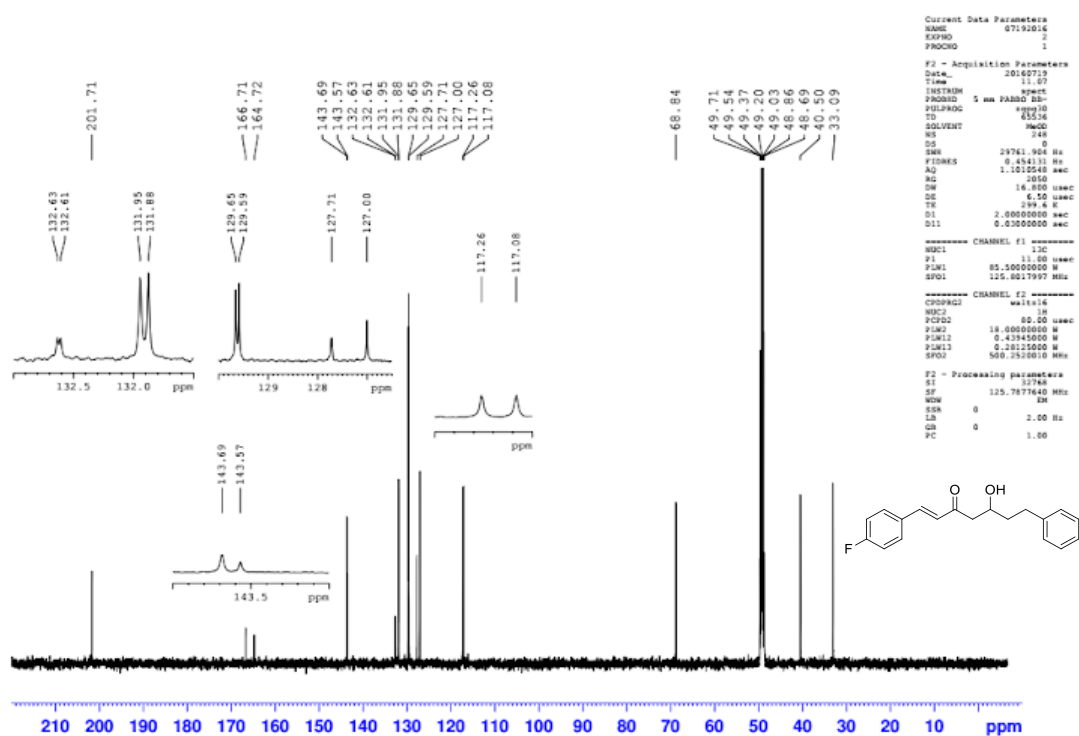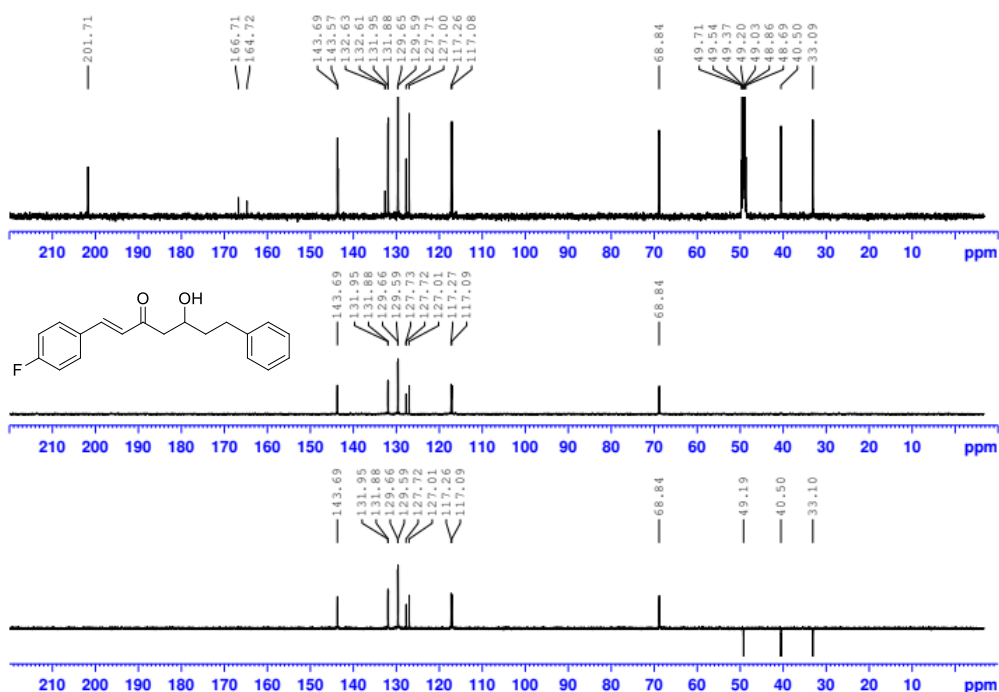

Compound 6a

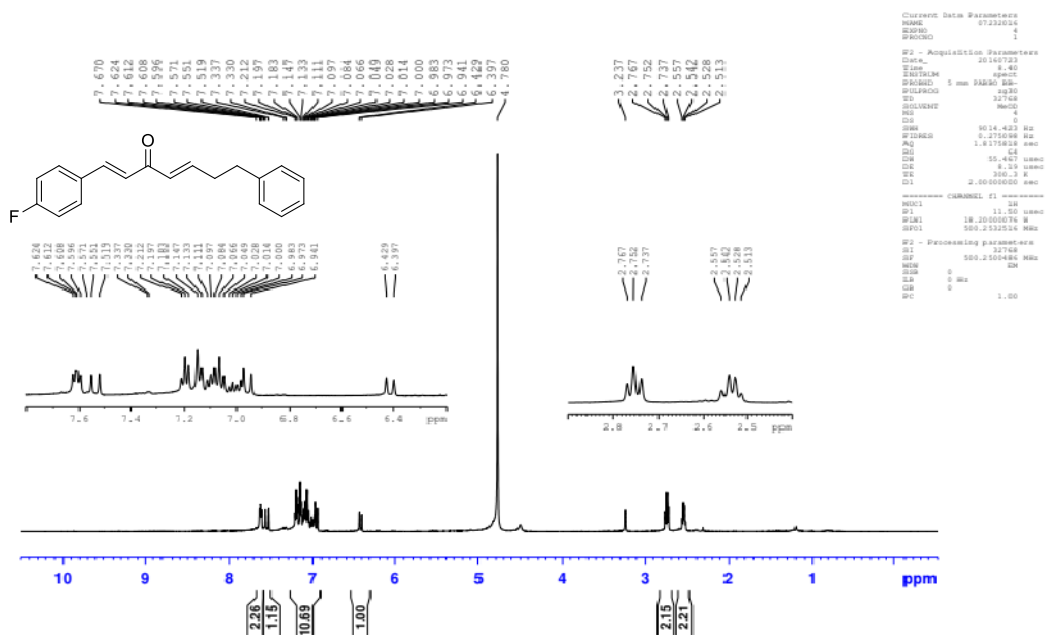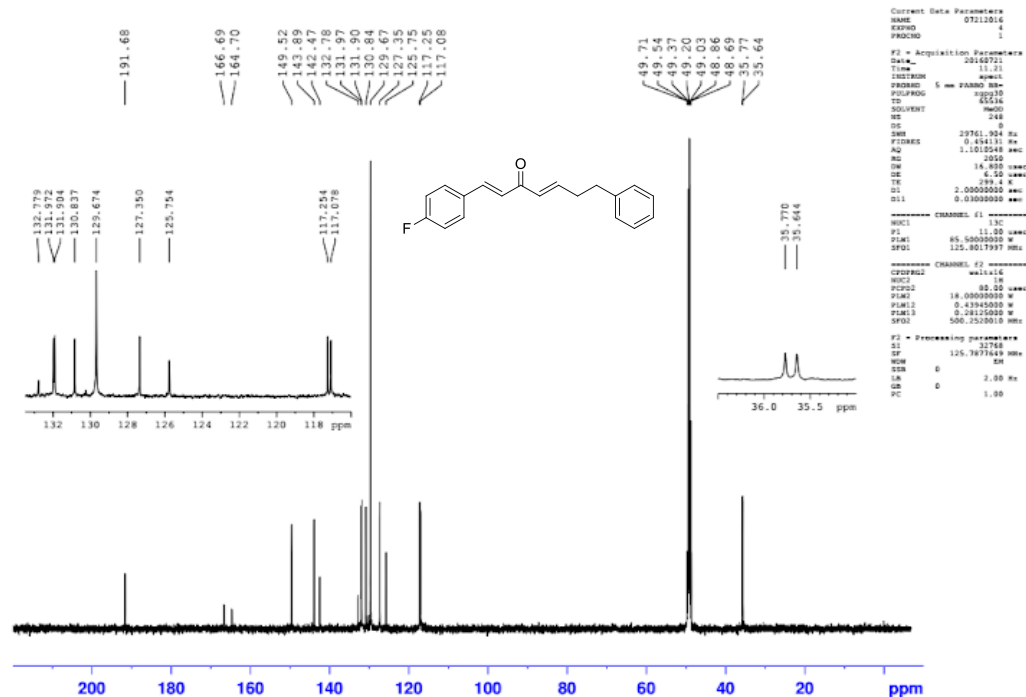

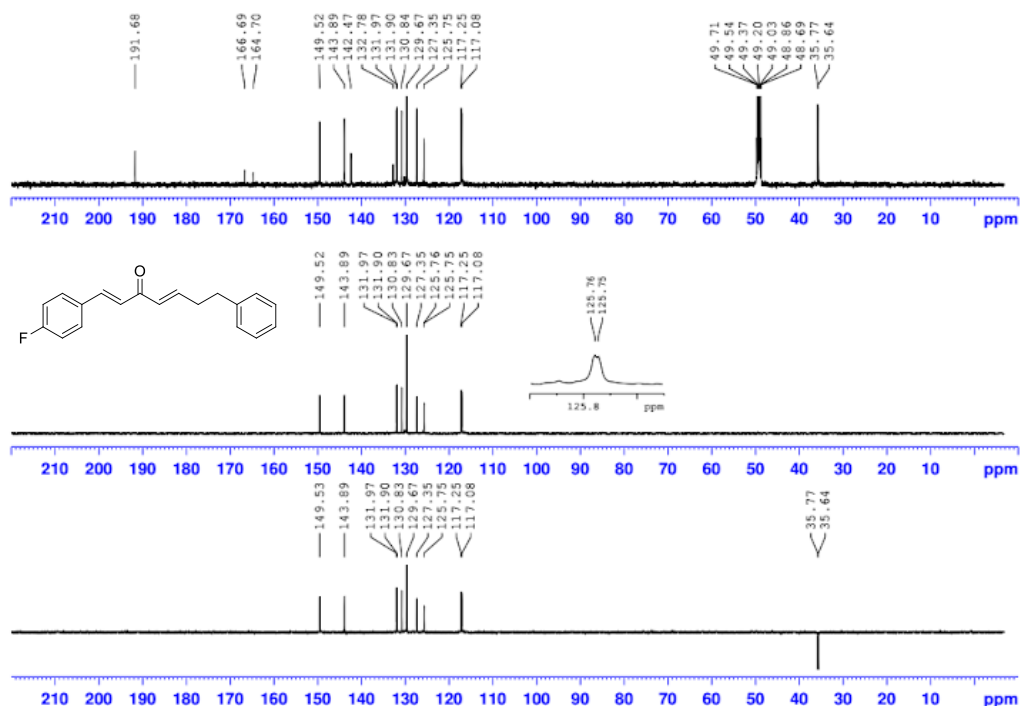

Compound 7

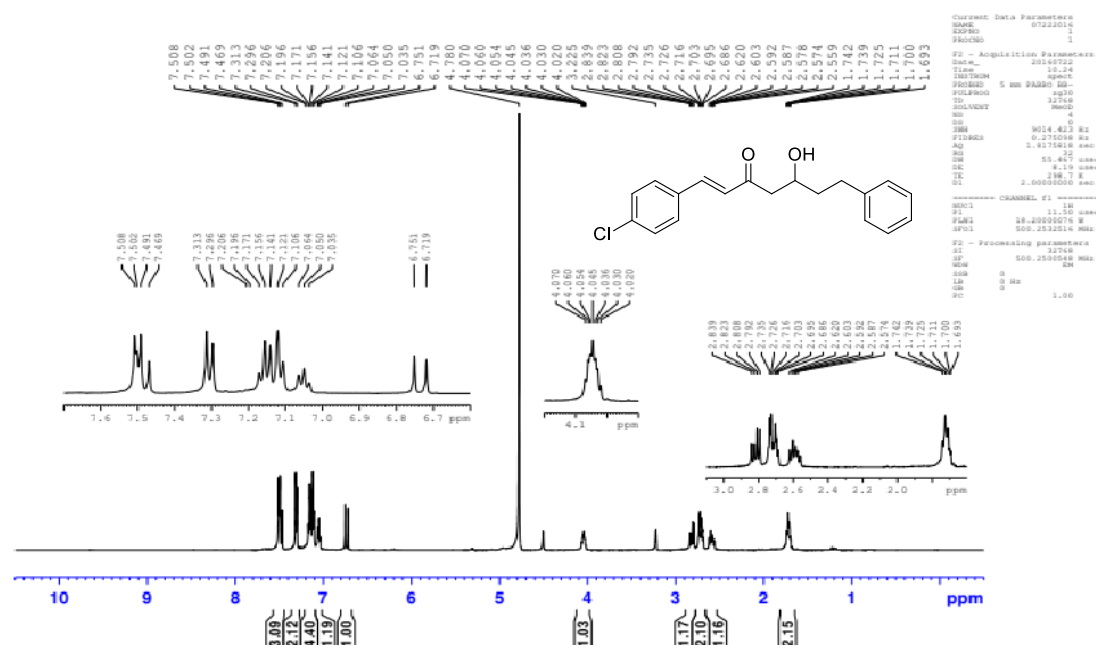



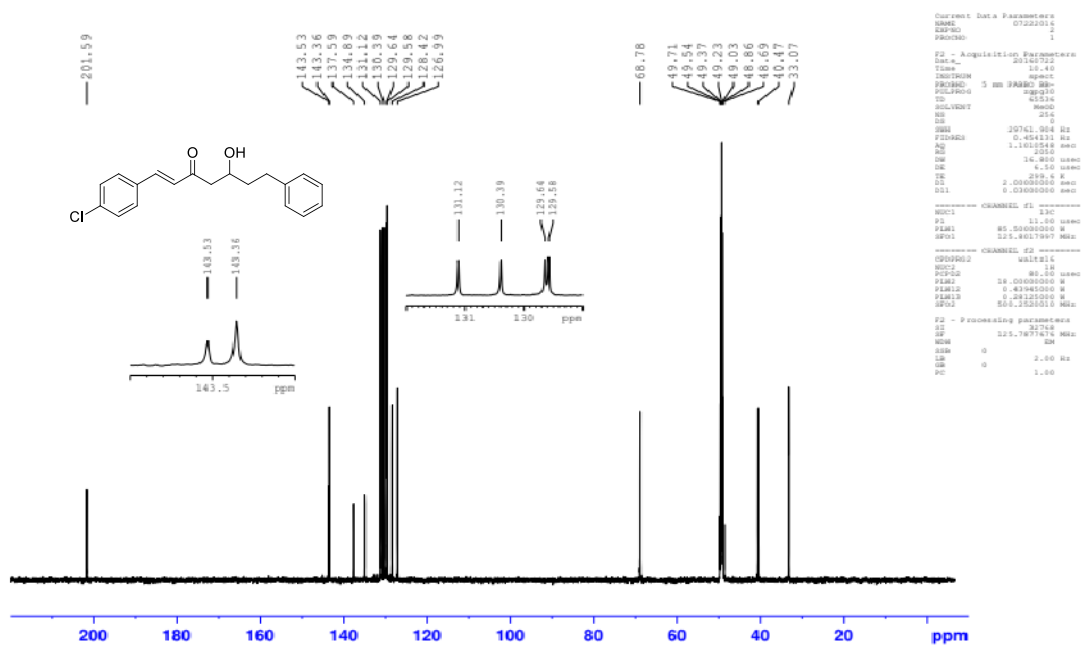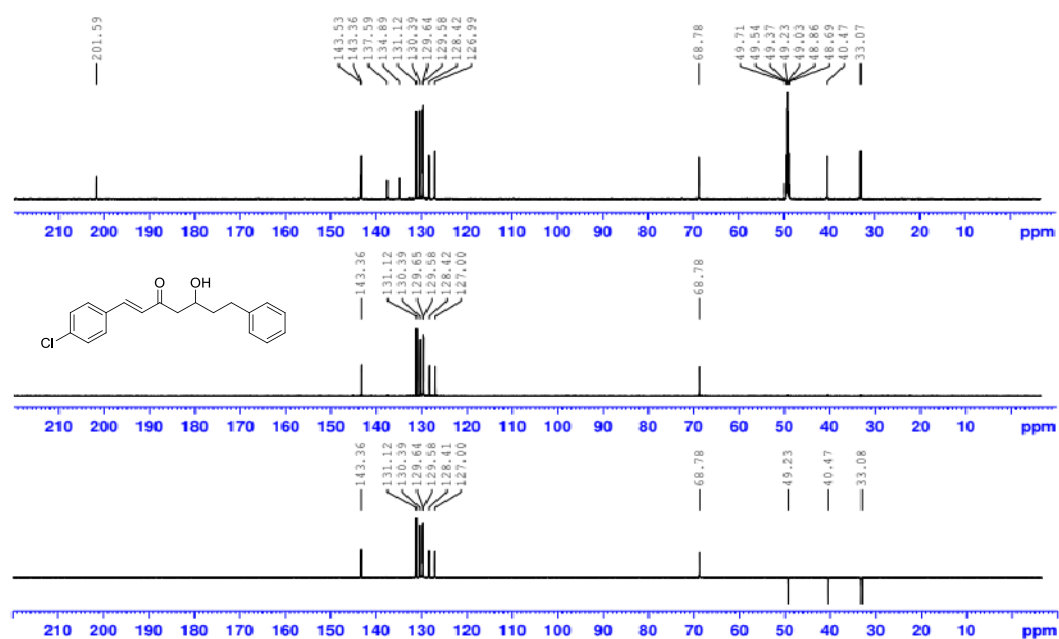

Compound 7a

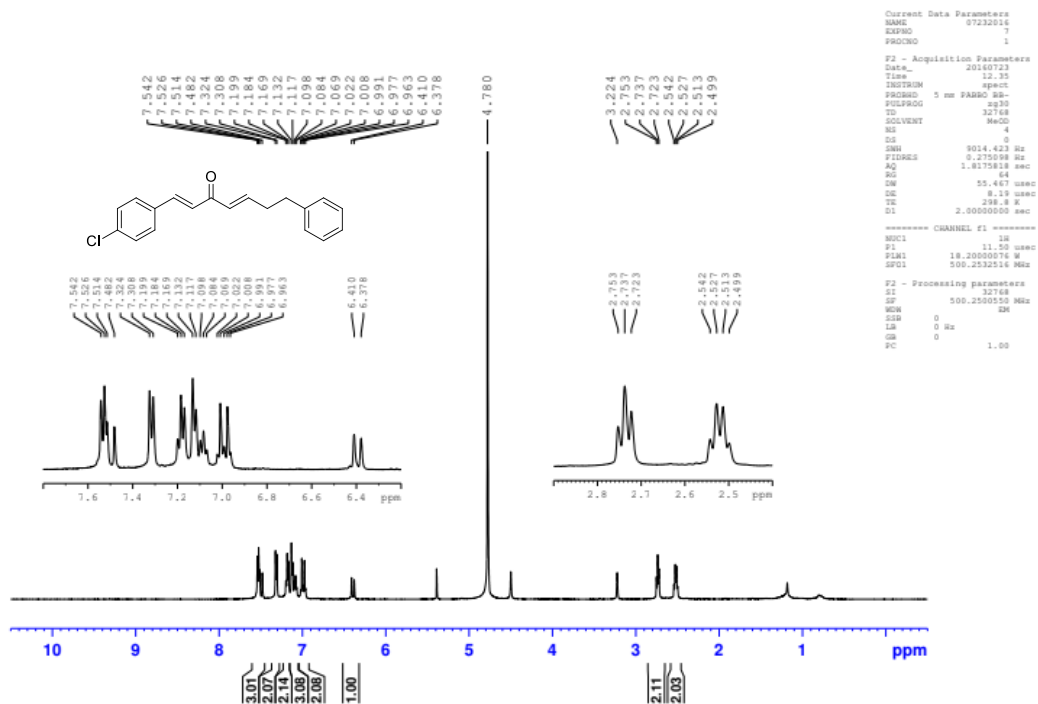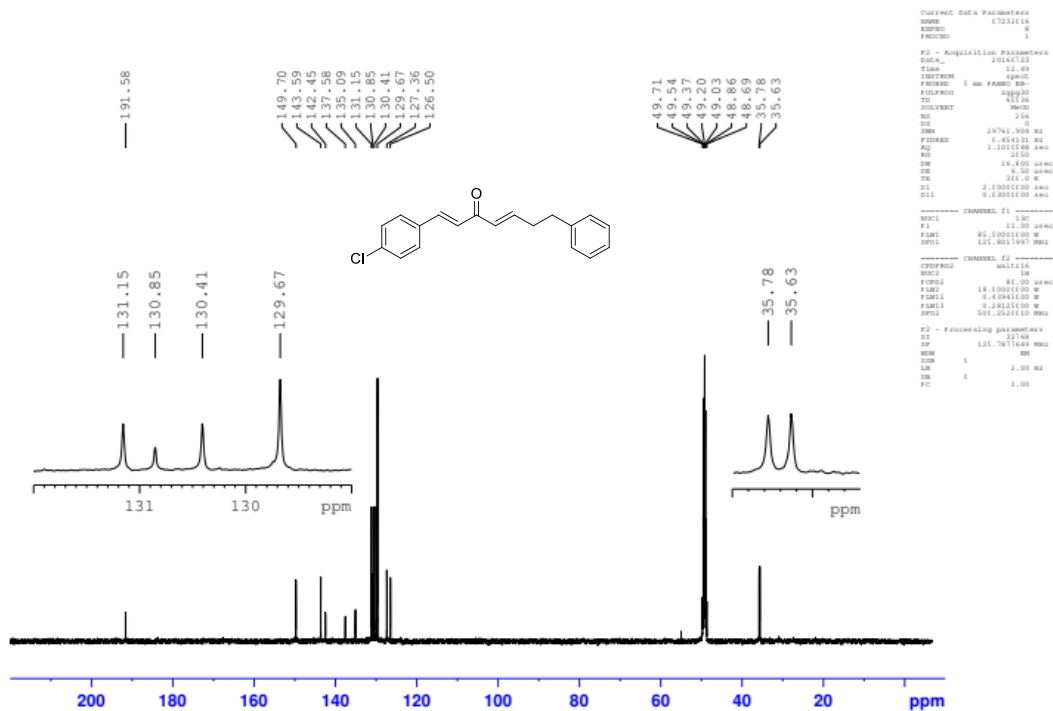

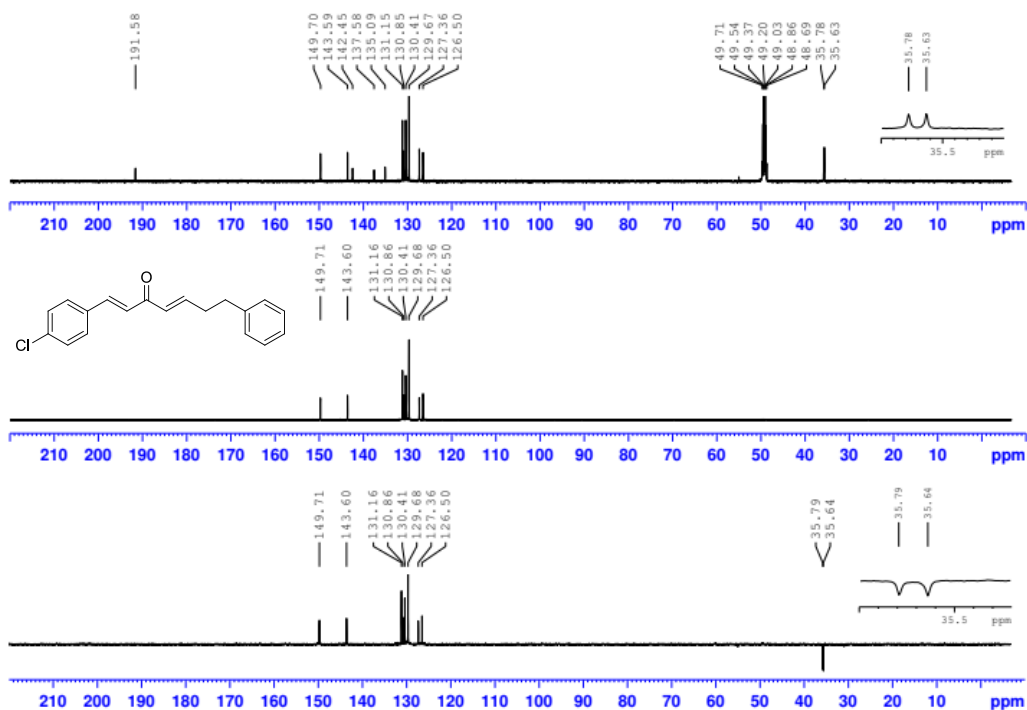

## Compound 8

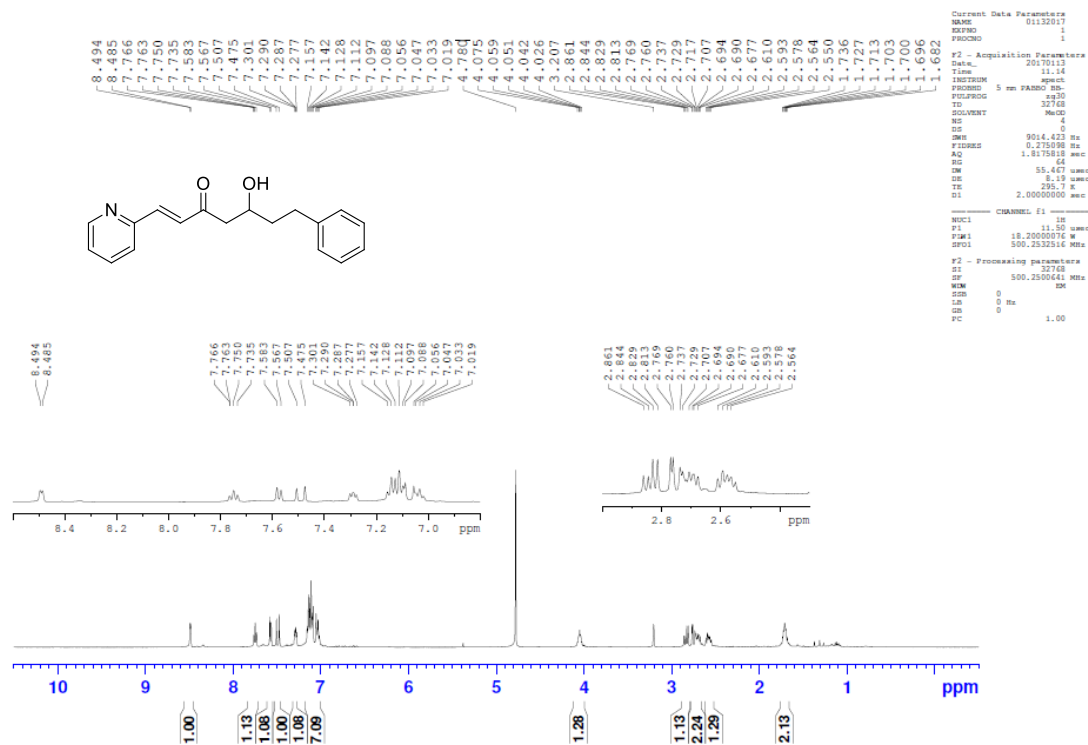

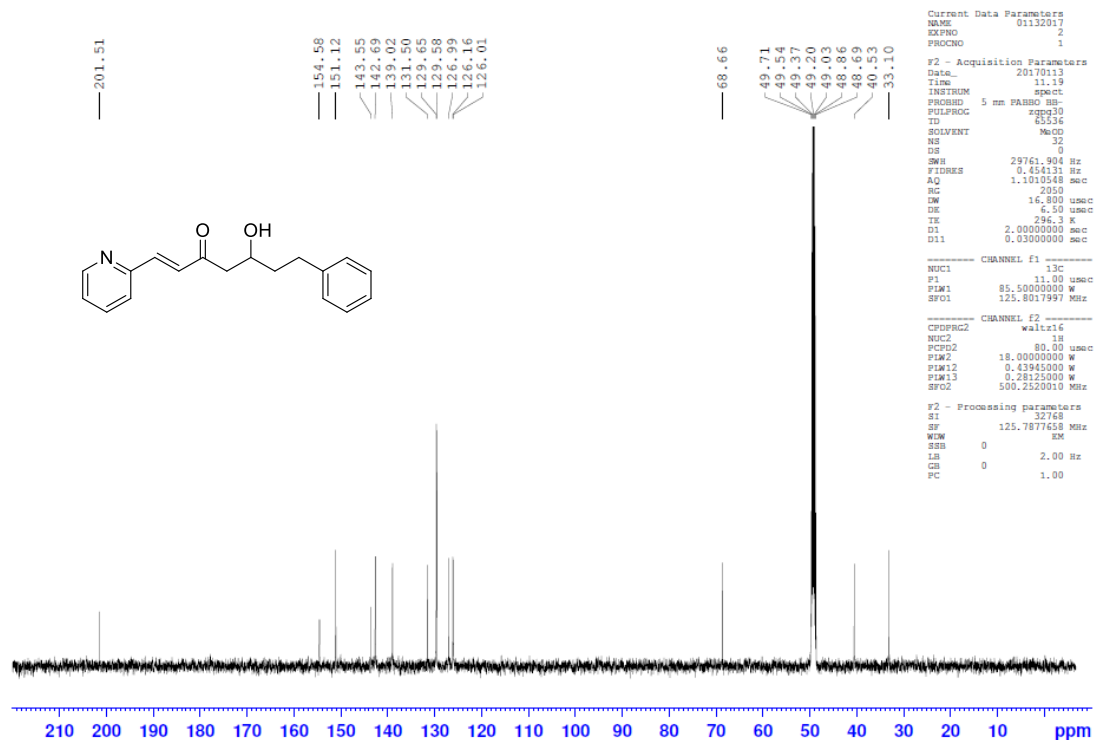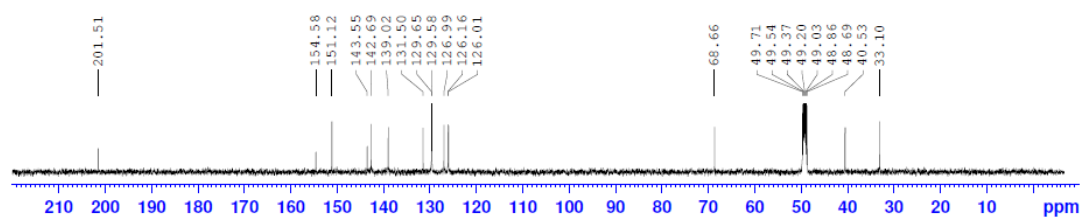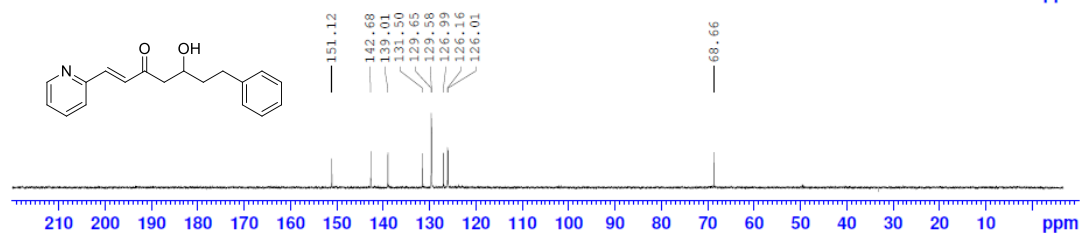

Compound 9

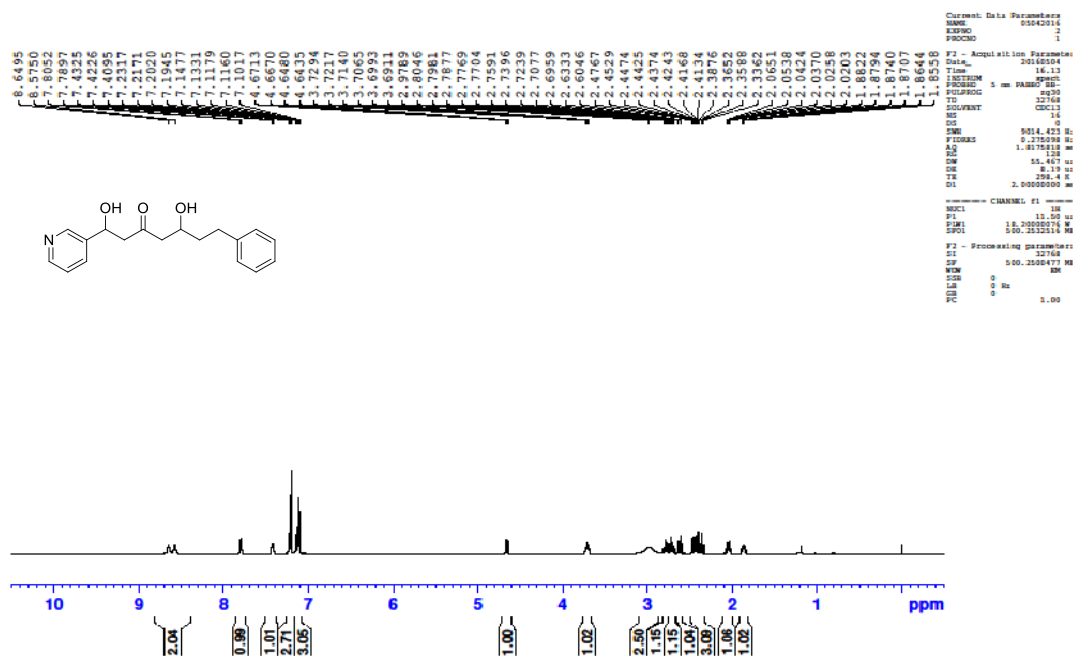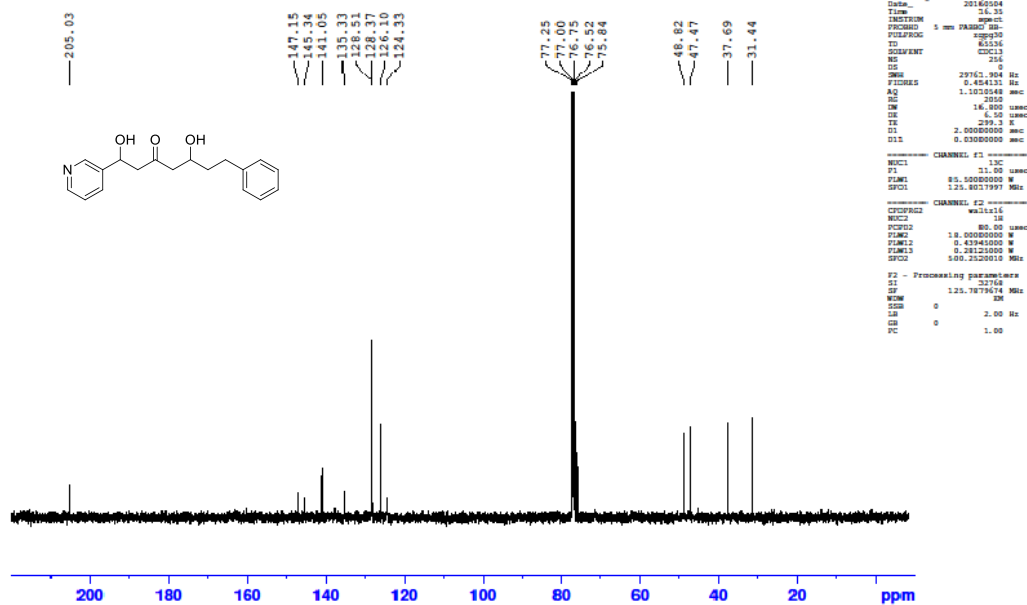

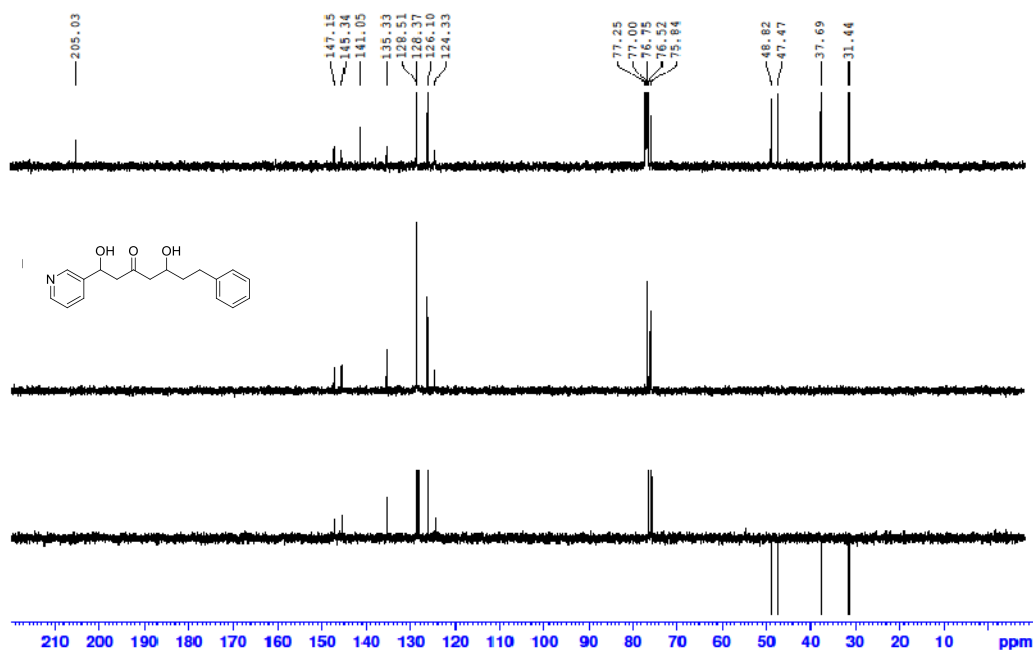

## Compound 10

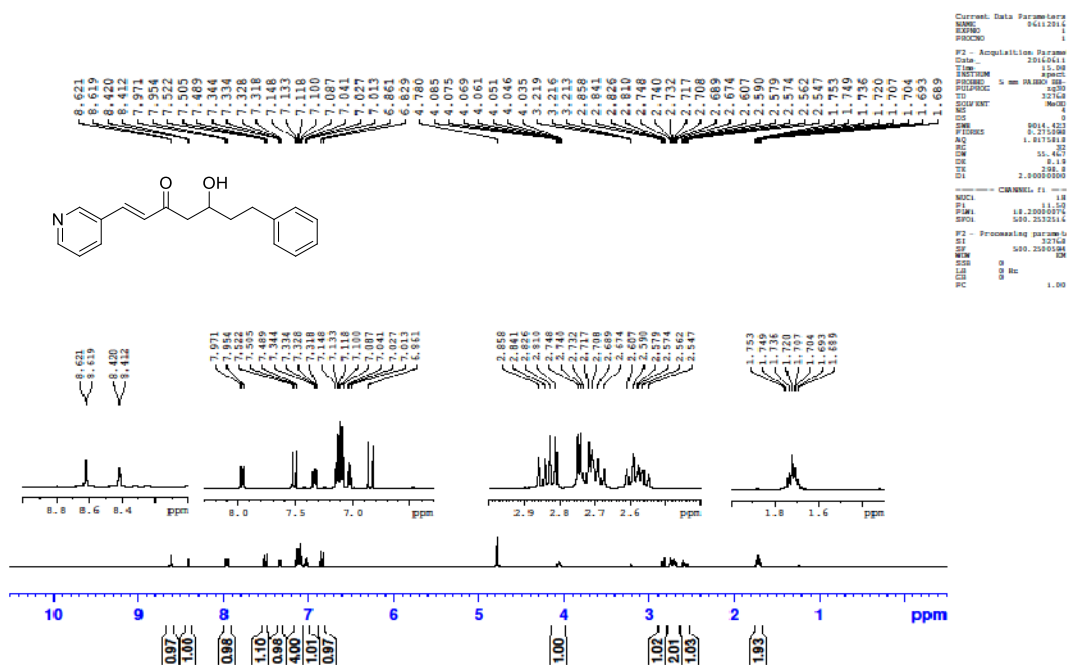

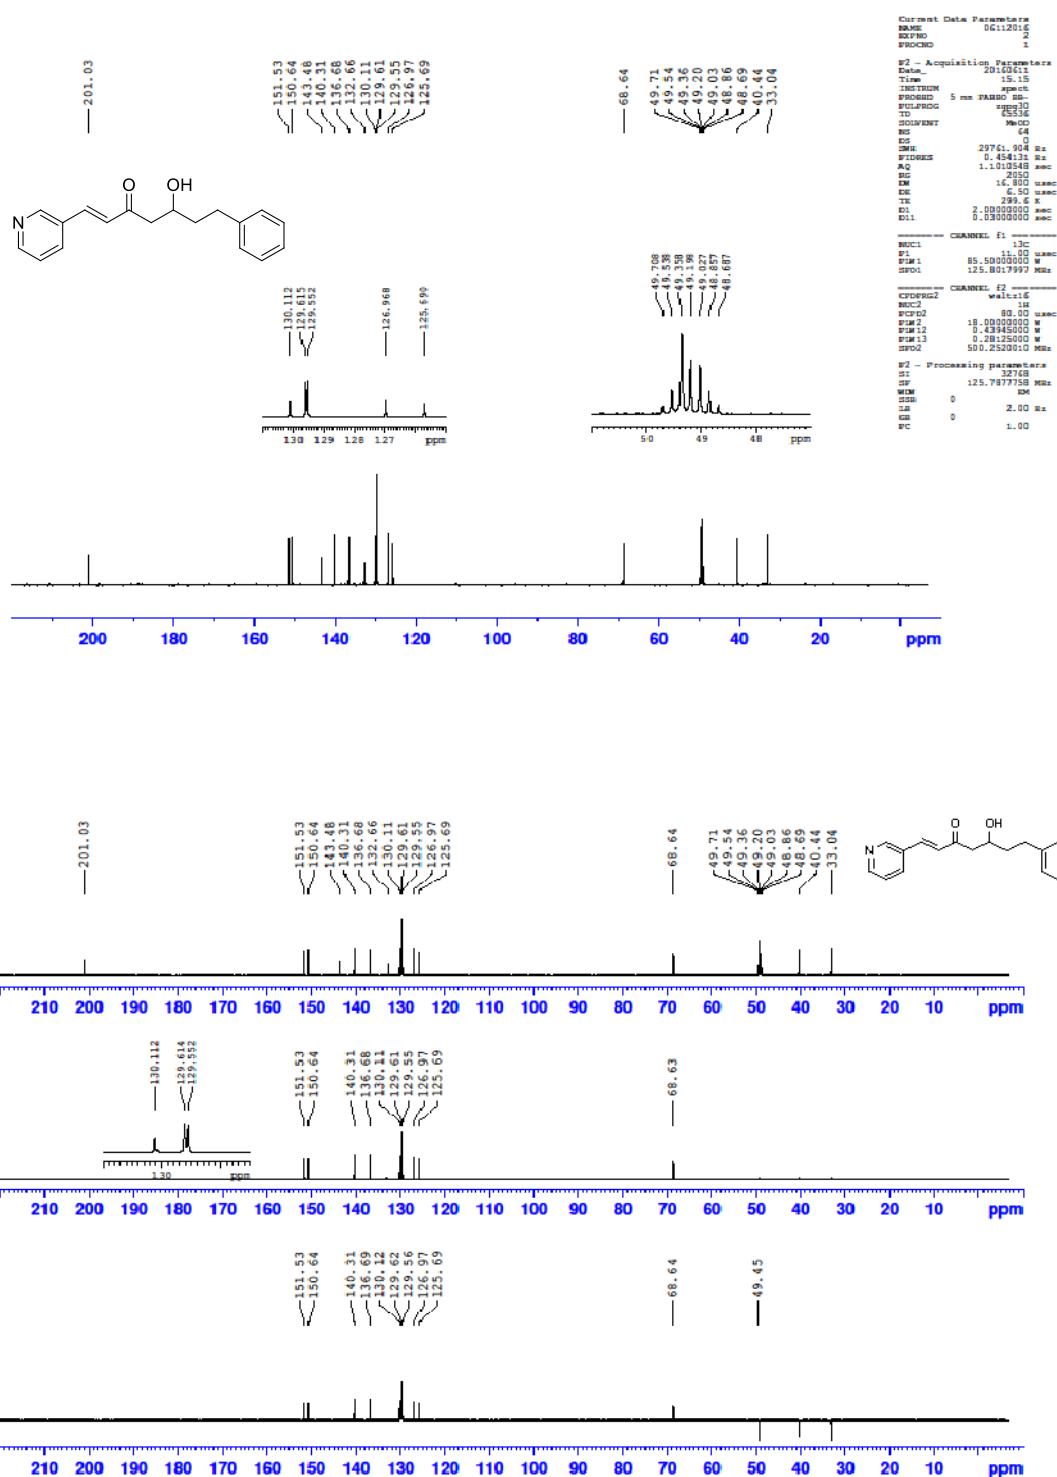

Compound 11

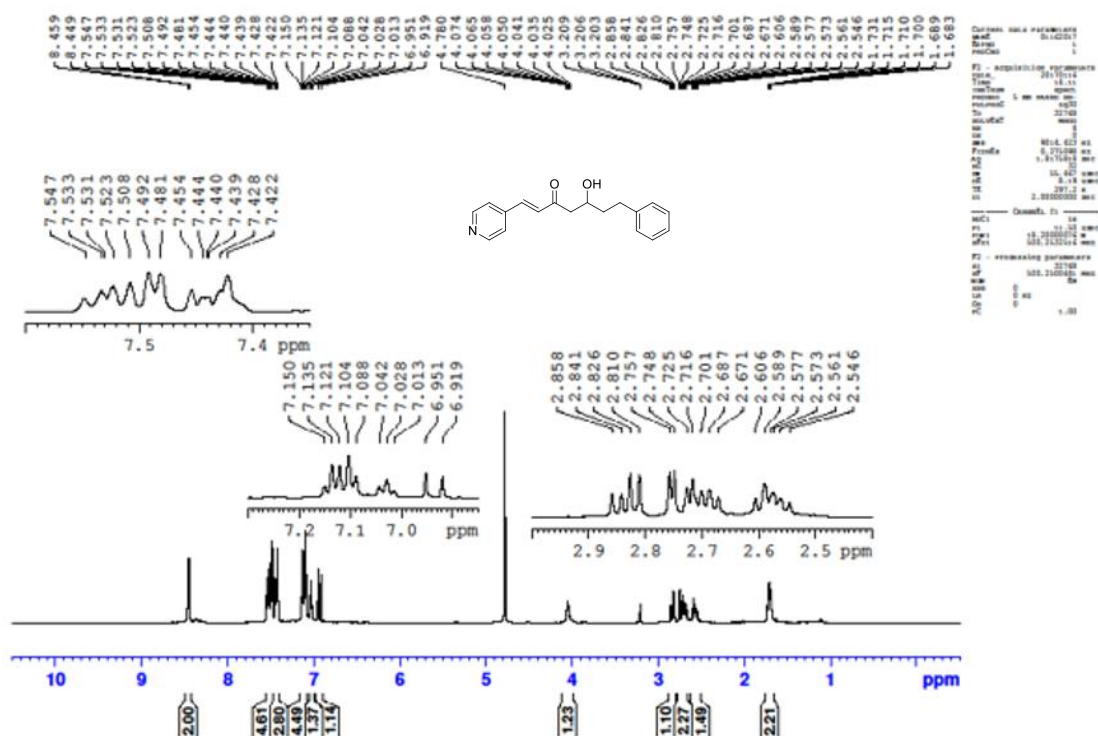

Current Data Parameters  
 Name: 01162017  
 Date: 10/10/16  
 Time: 14:11  
 Location: 400MHz  
 Sample: 1  
 Volume: 0.500  
 Concent: 0.500  
 Solvent: MeOH  
 NS: 2  
 DS: 4  
 SWH: 6014.875 Hz  
 FIDRES: 0.271266 Hz  
 AQ: 1.8716151 sec  
 RG: 327.40  
 GB: 0  
 PC: 0  
 LB: 0.0000000 Hz  
 GB: 0  
 PC: 0  
 LB: 0.0000000 Hz  
 GB: 0  
 PC: 0

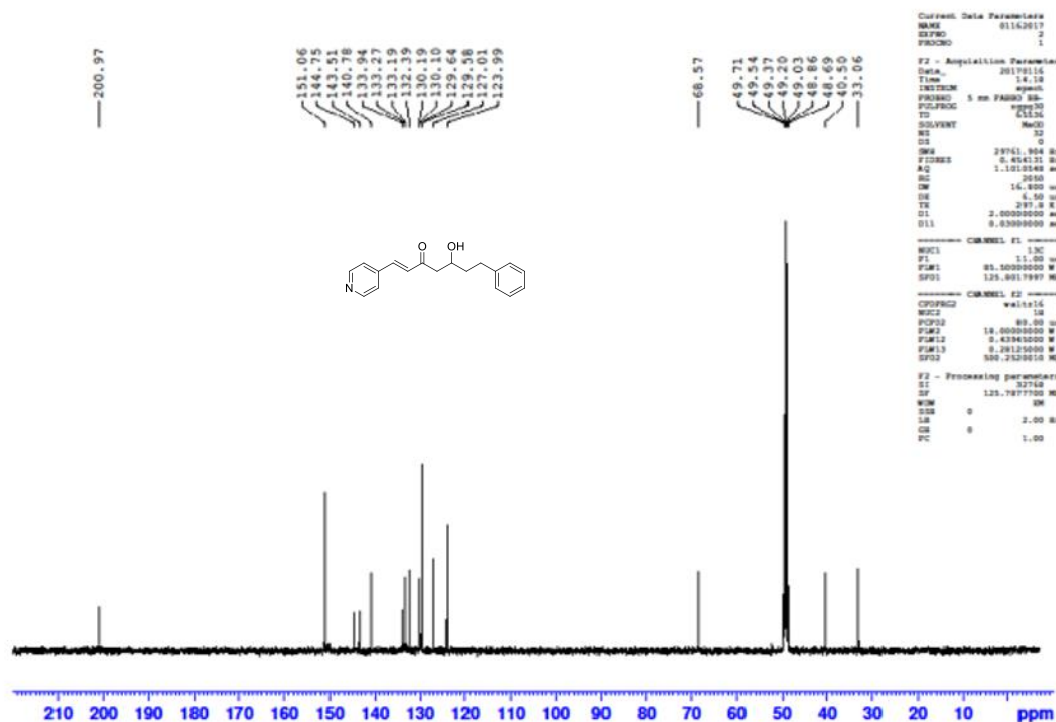

Current Data Parameters  
 Name: 01162017  
 Date: 10/10/16  
 Time: 14:18  
 Location: 400MHz  
 Sample: 1  
 Volume: 0.500  
 Concent: 0.500  
 Solvent: MeOH  
 NS: 2  
 DS: 4  
 SWH: 6014.875 Hz  
 FIDRES: 0.271266 Hz  
 AQ: 1.8716151 sec  
 RG: 327.40  
 GB: 0  
 PC: 0  
 LB: 0.0000000 Hz  
 GB: 0  
 PC: 0  
 LB: 0.0000000 Hz  
 GB: 0  
 PC: 0



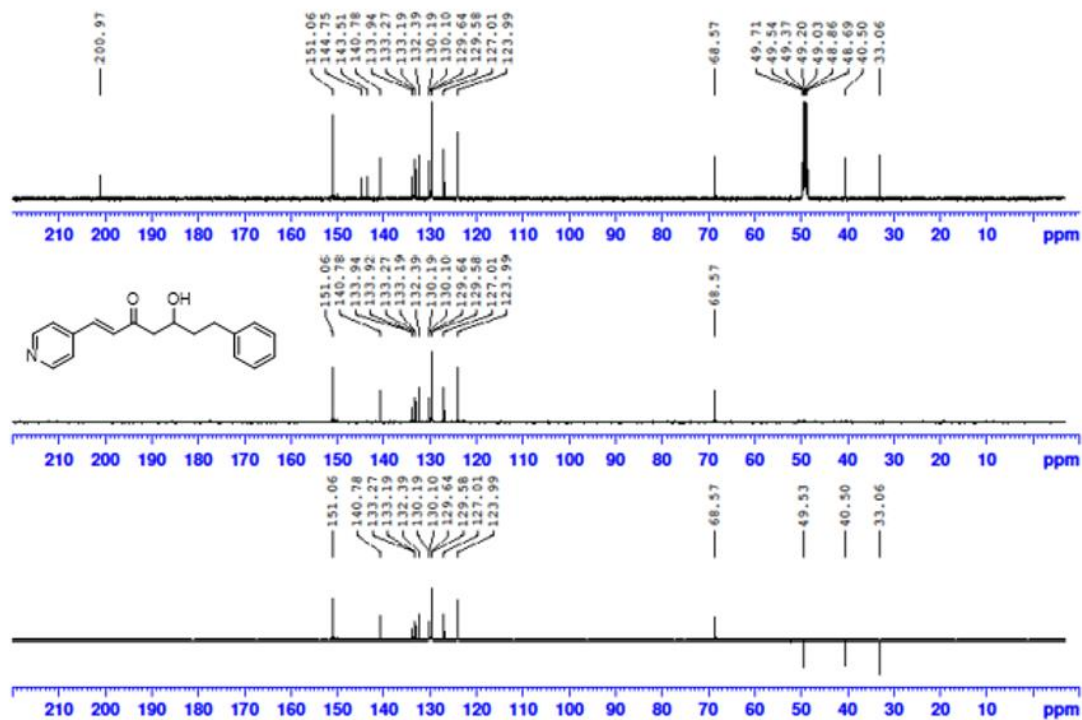

Compound 12

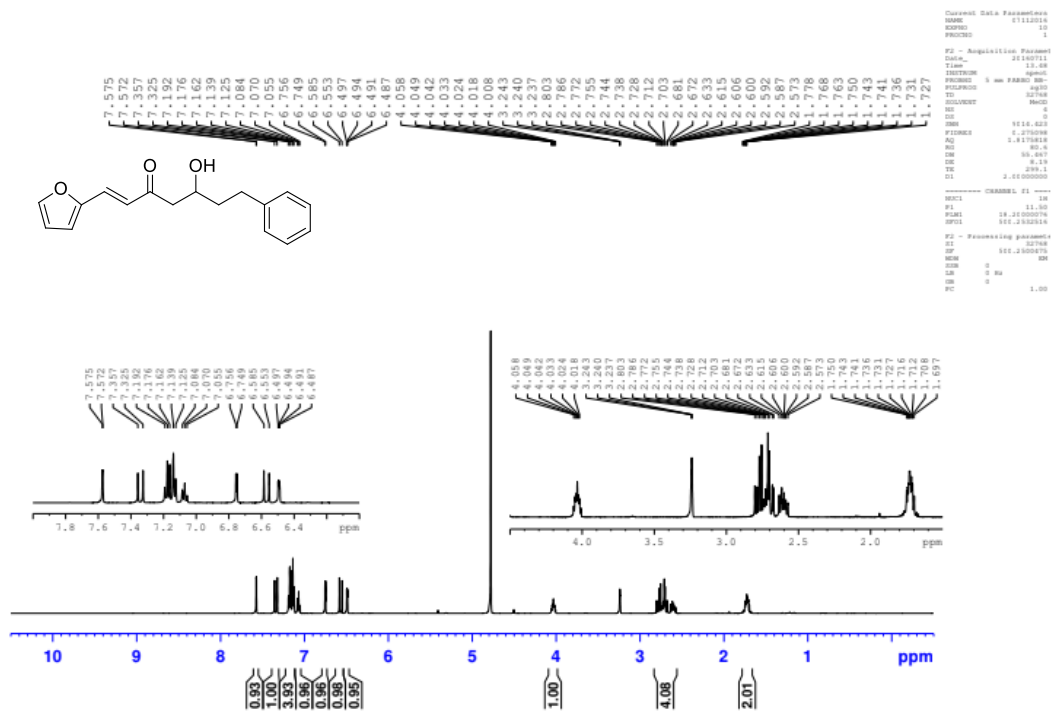

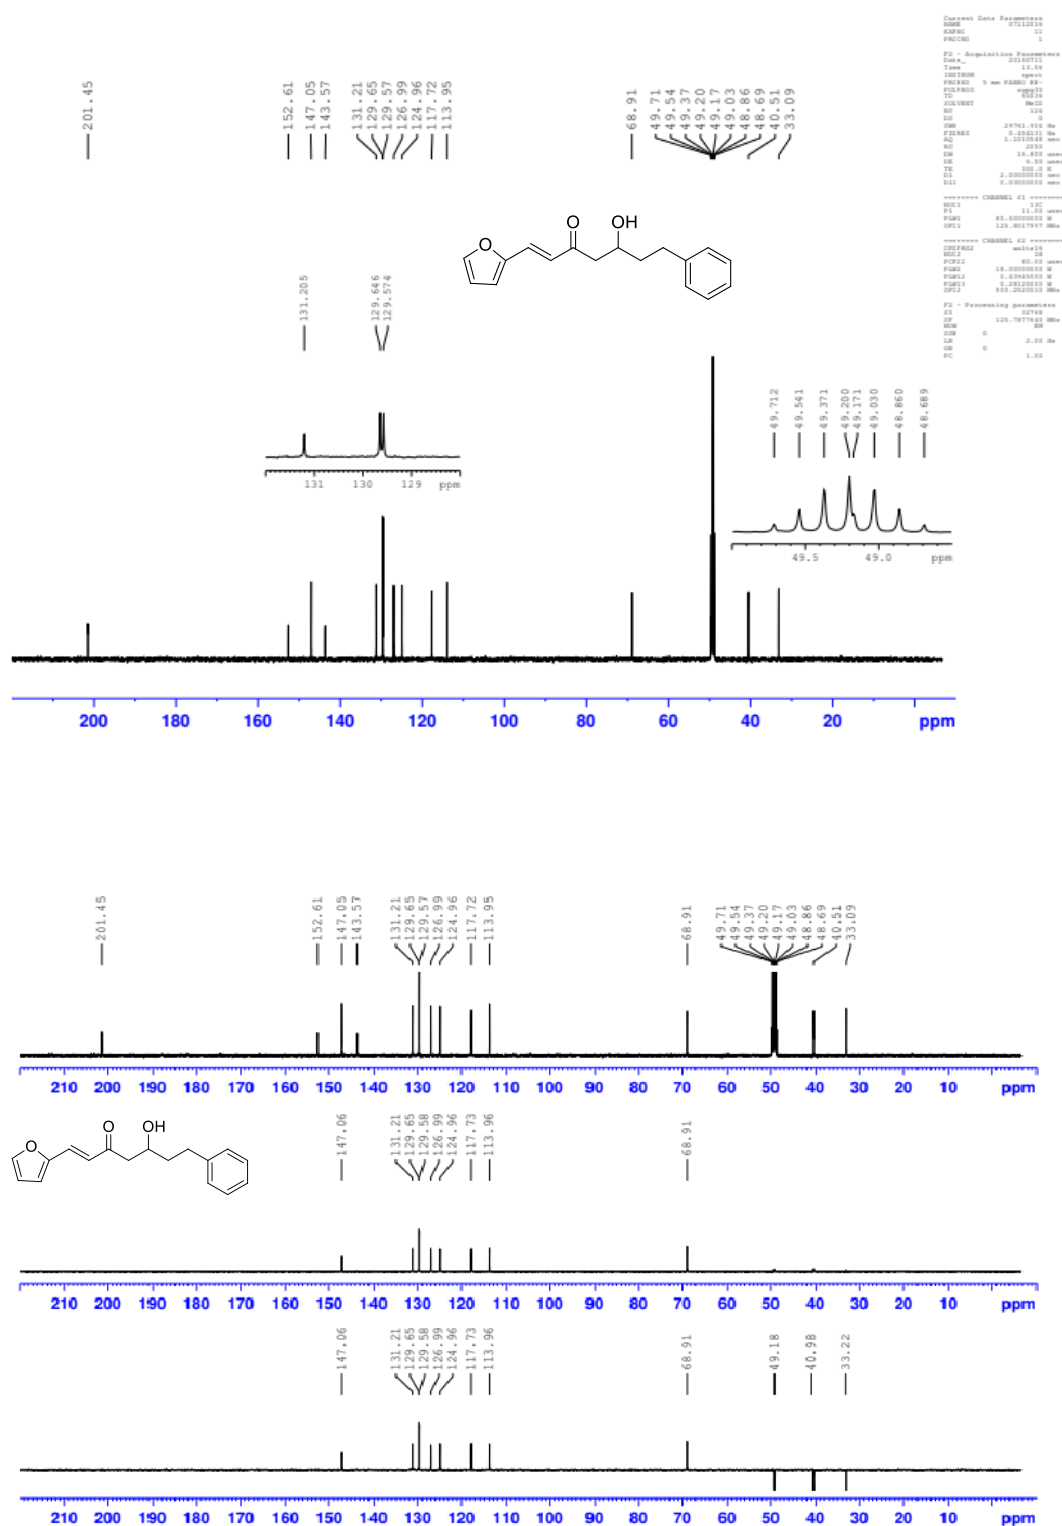

Compound 12a



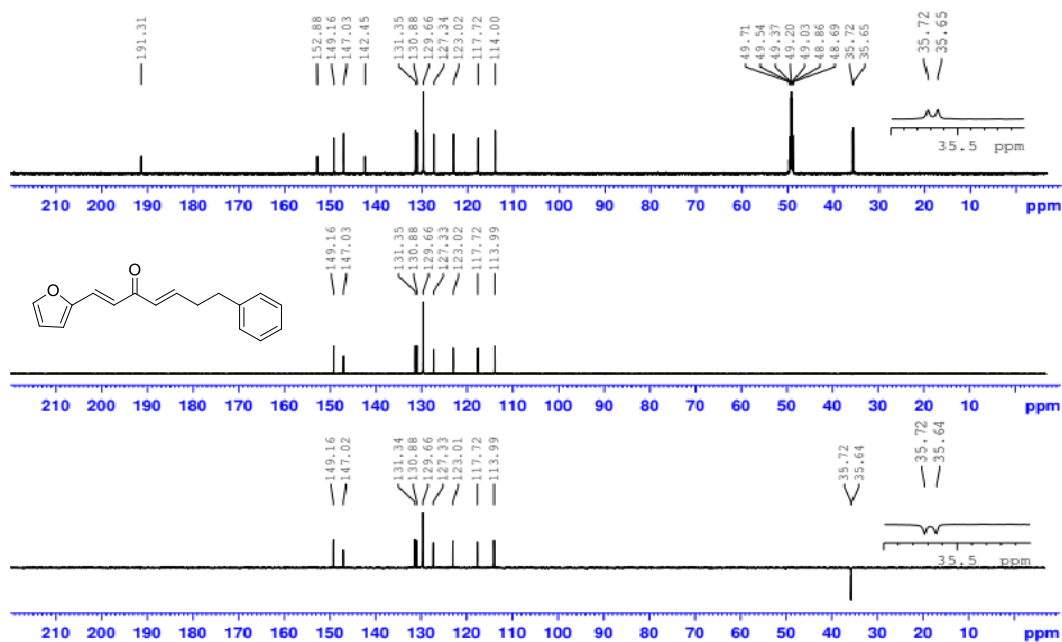

## Compound 14

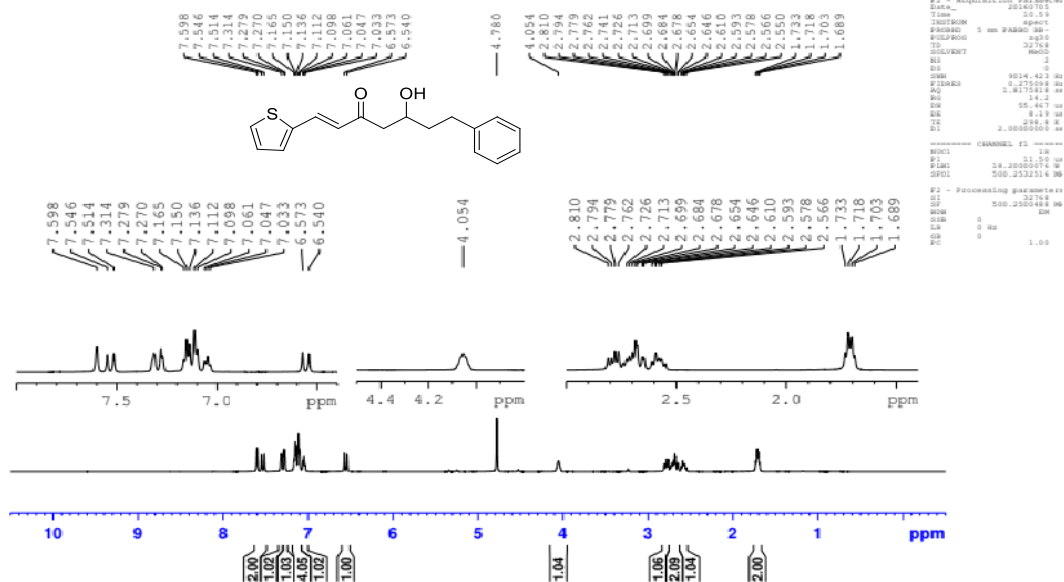

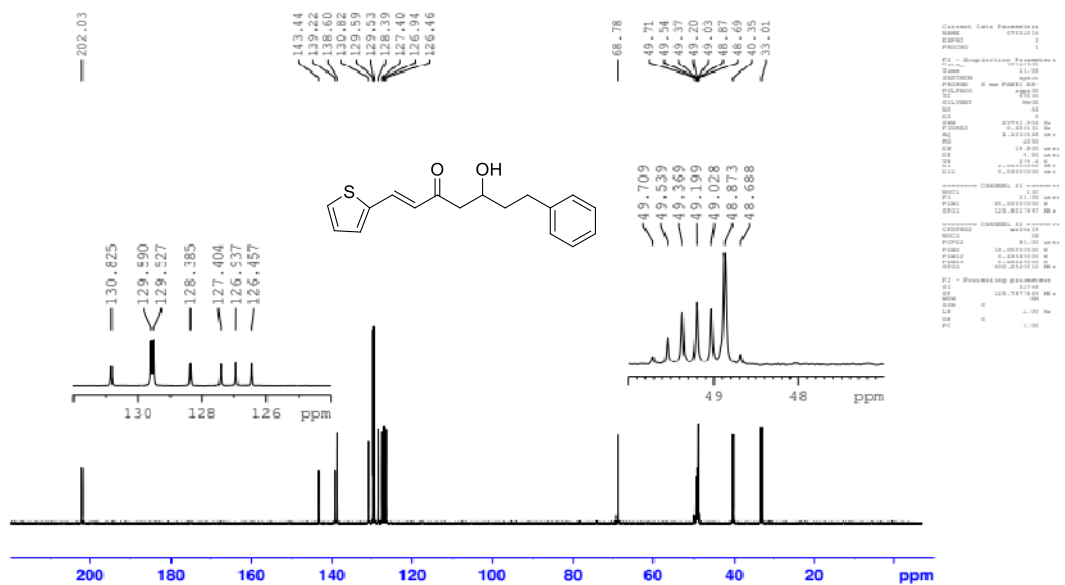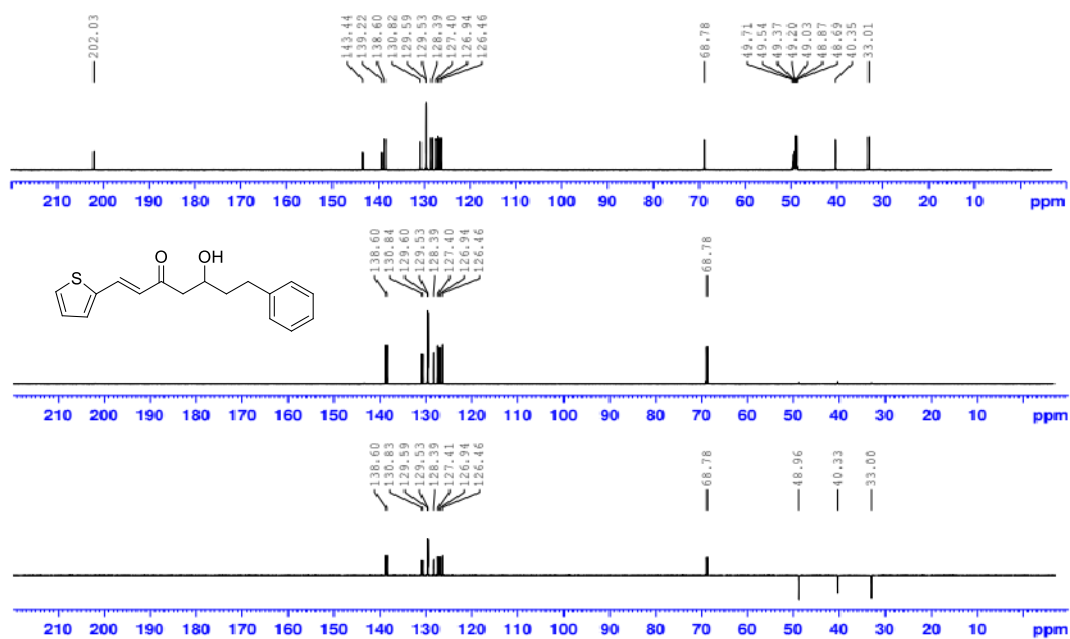

Compound 14a

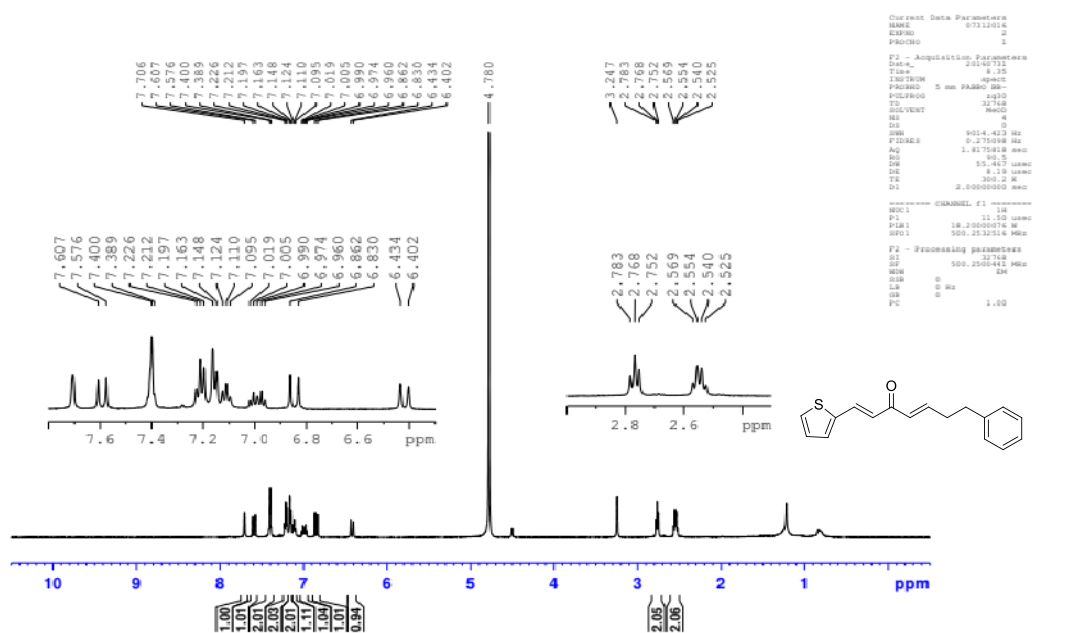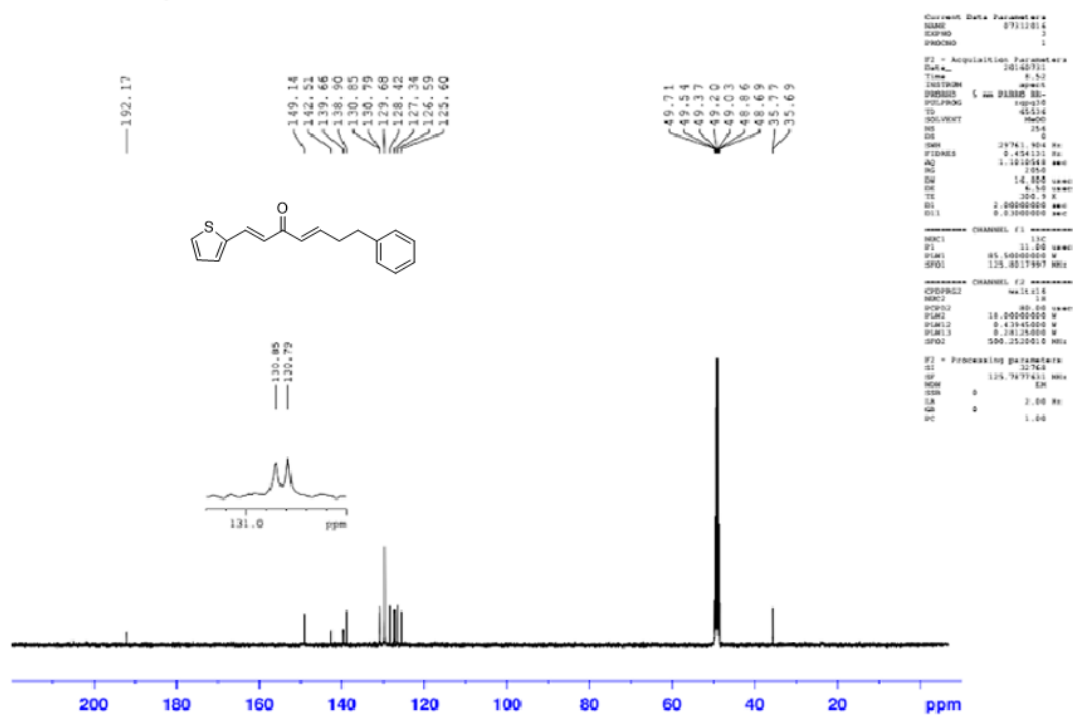

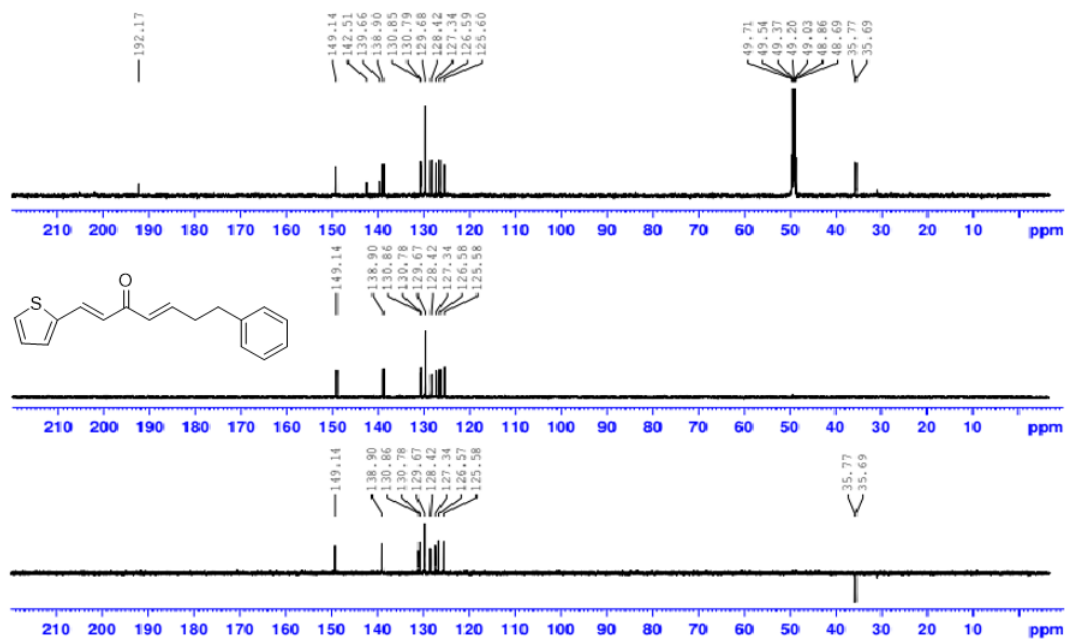

## Compound 15

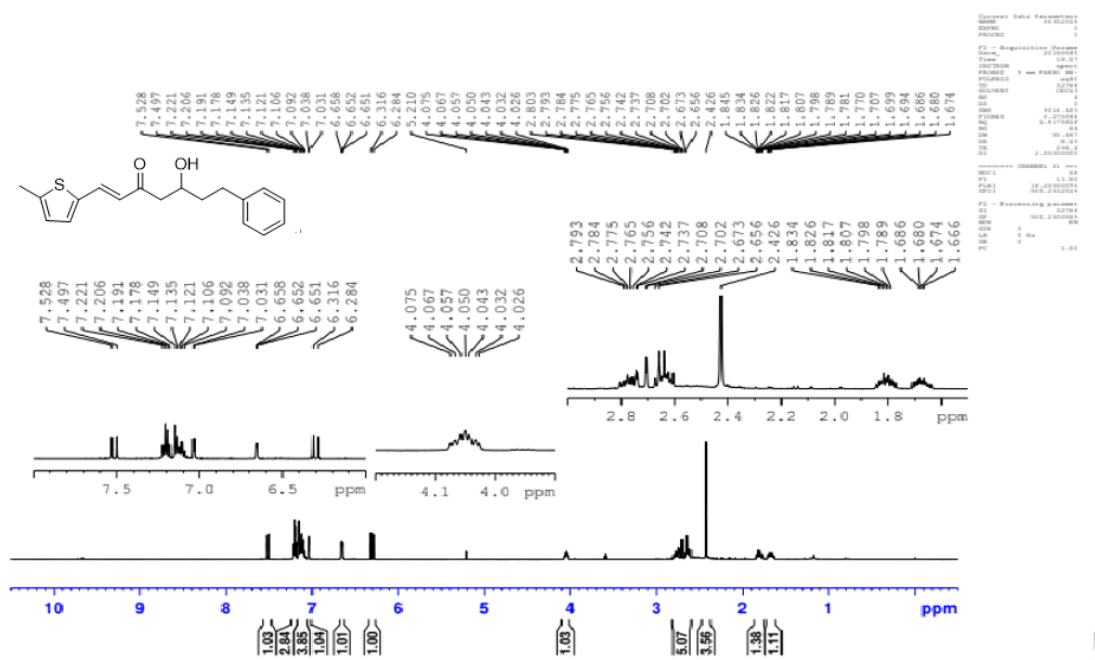

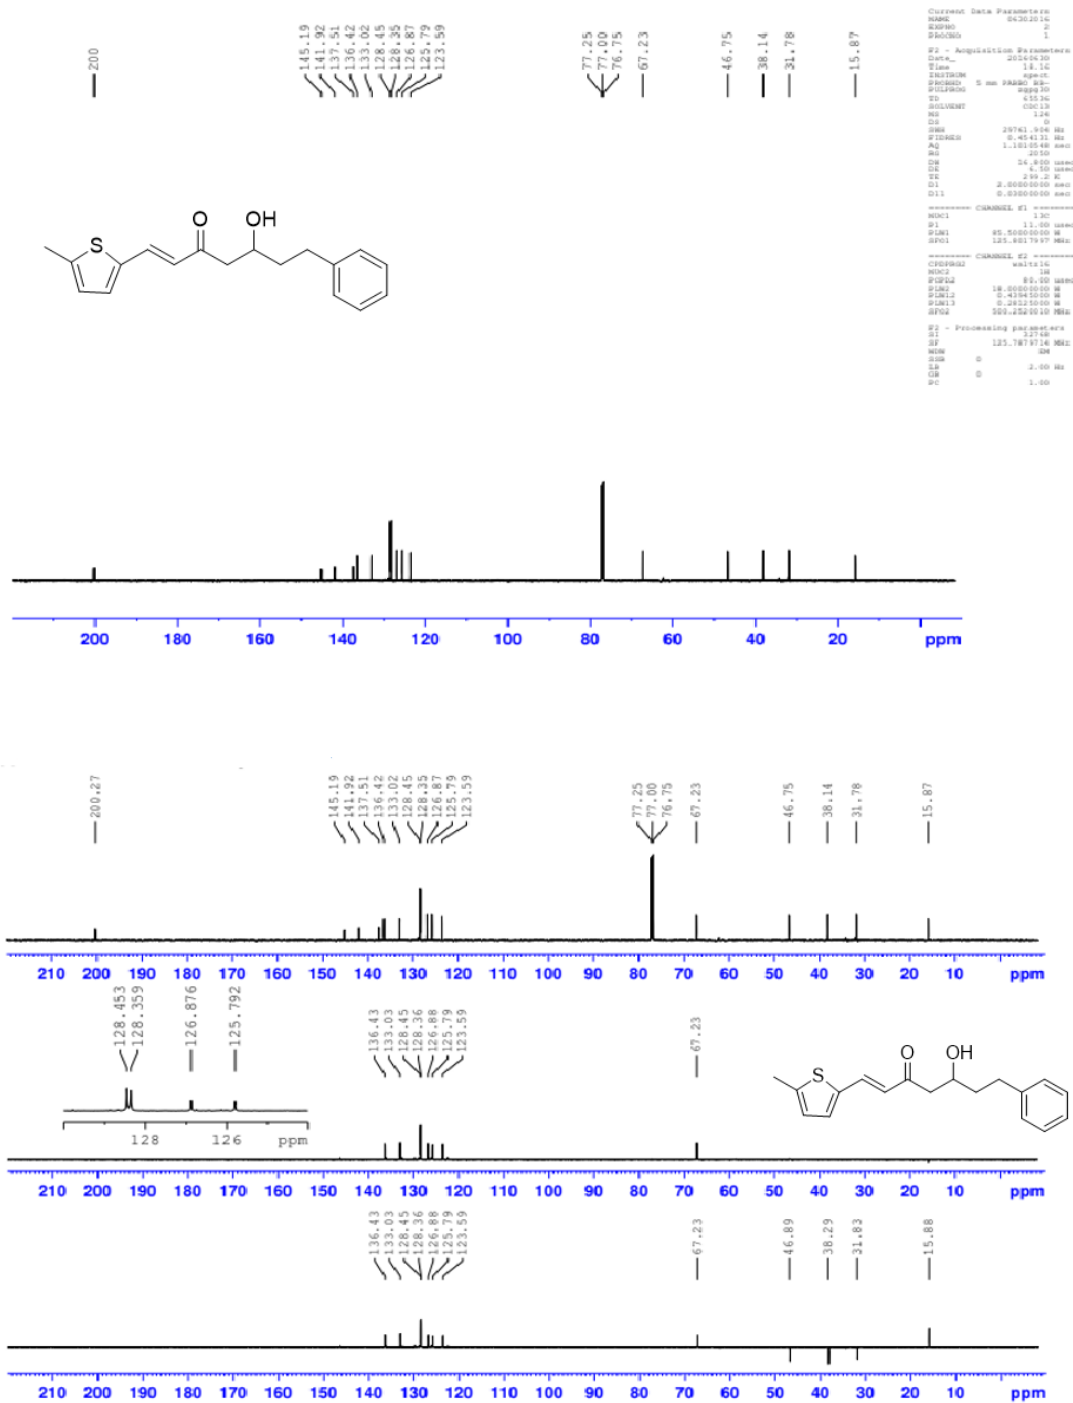

Compound 16



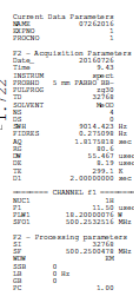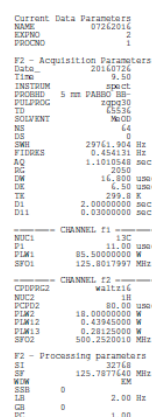

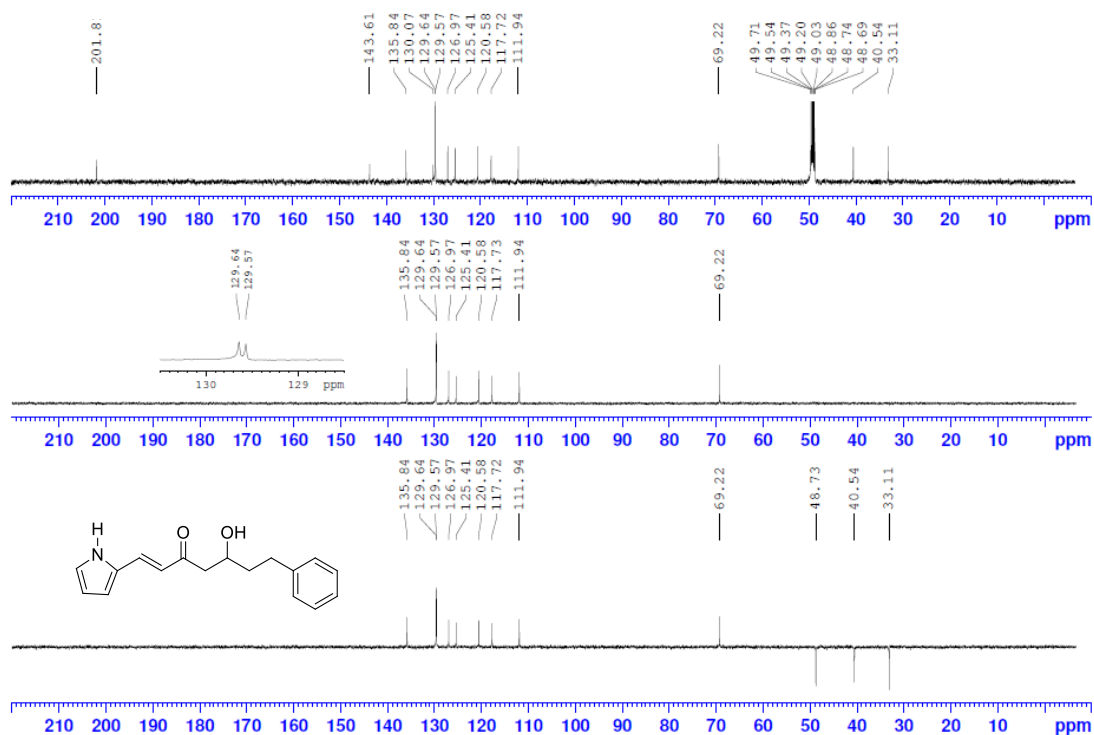

Compound 17

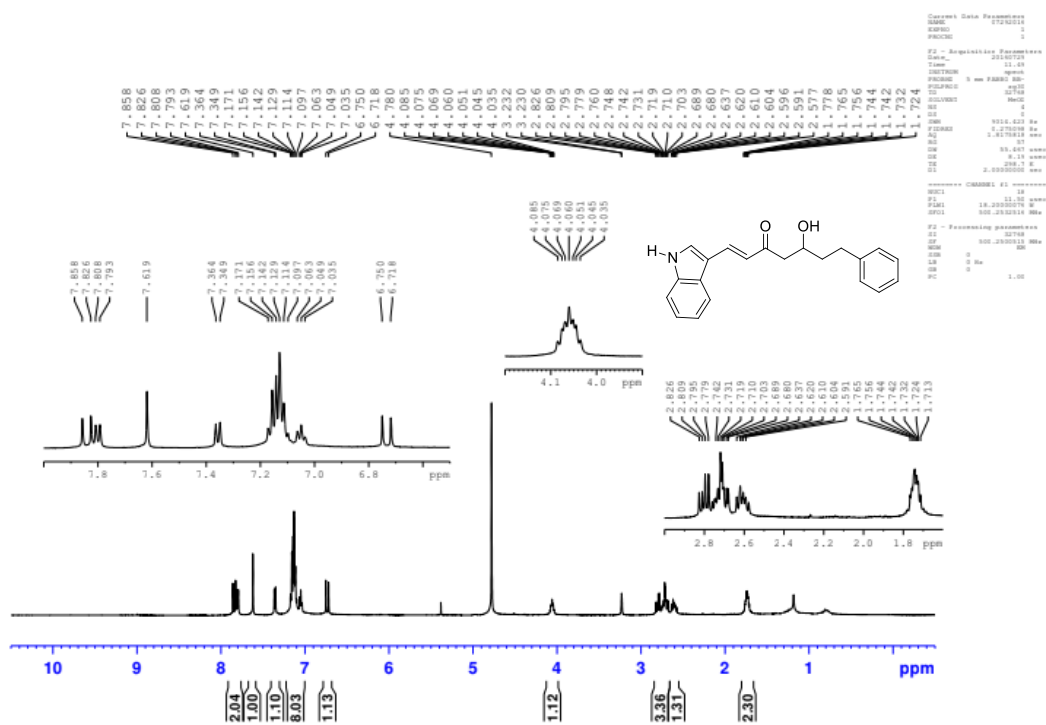

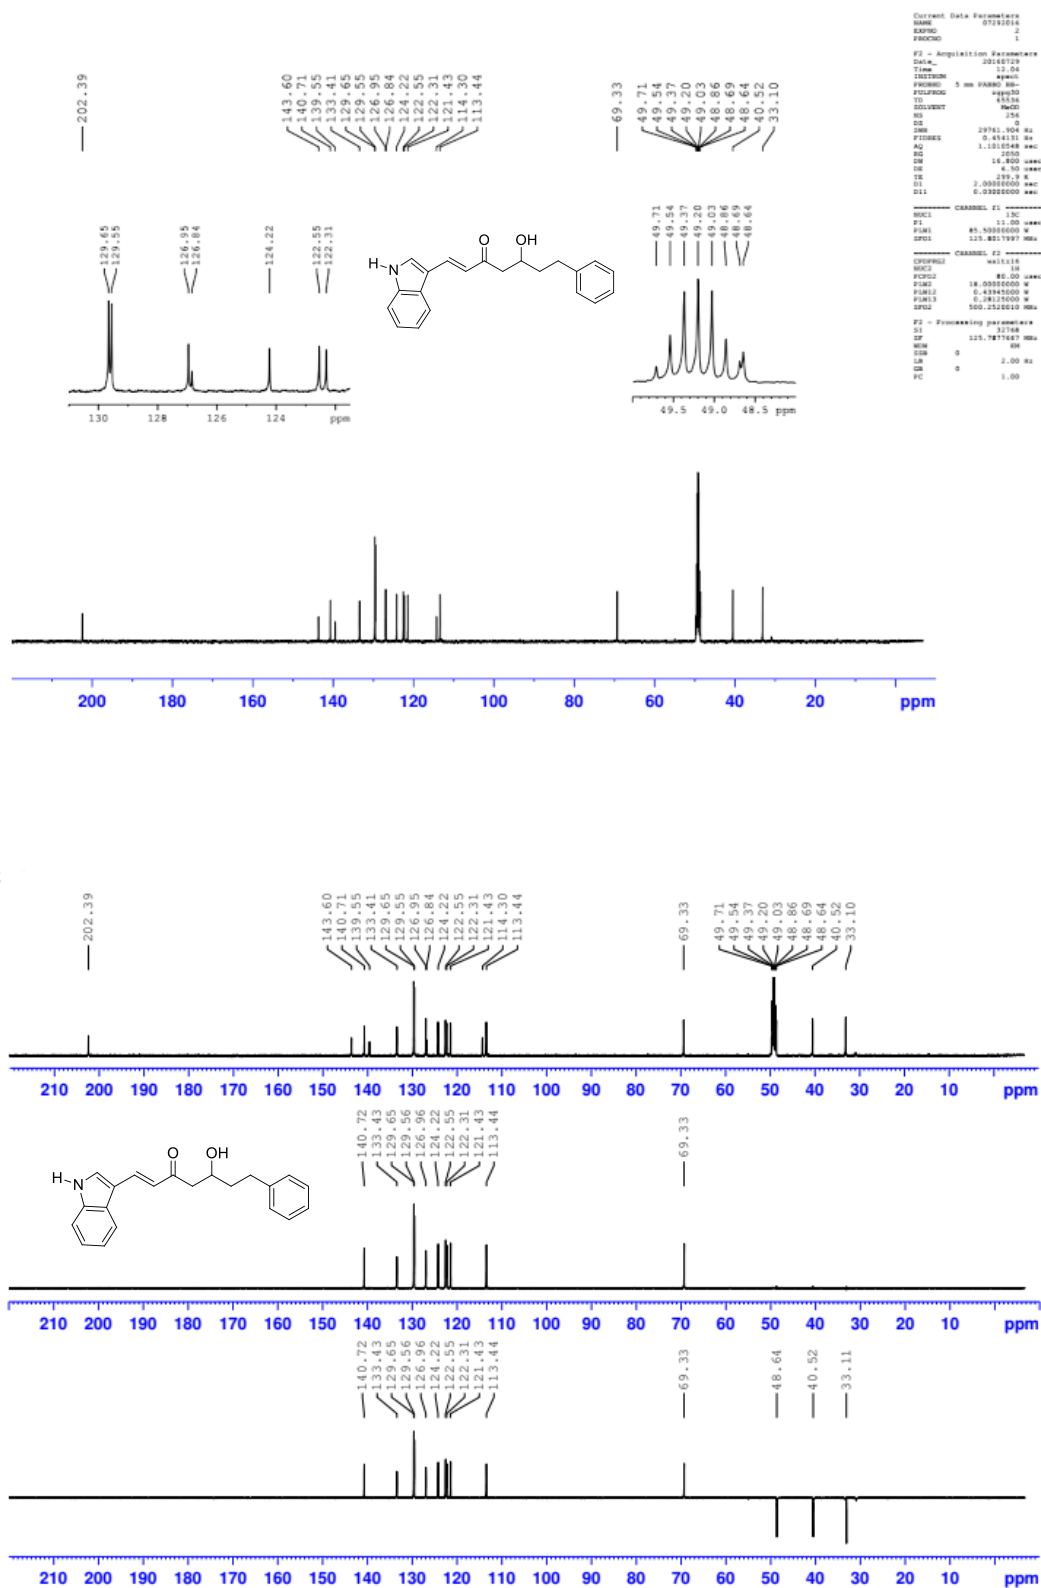

Compound 18

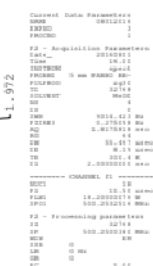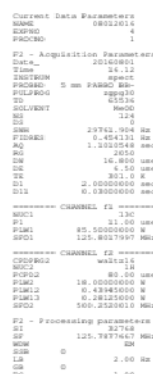

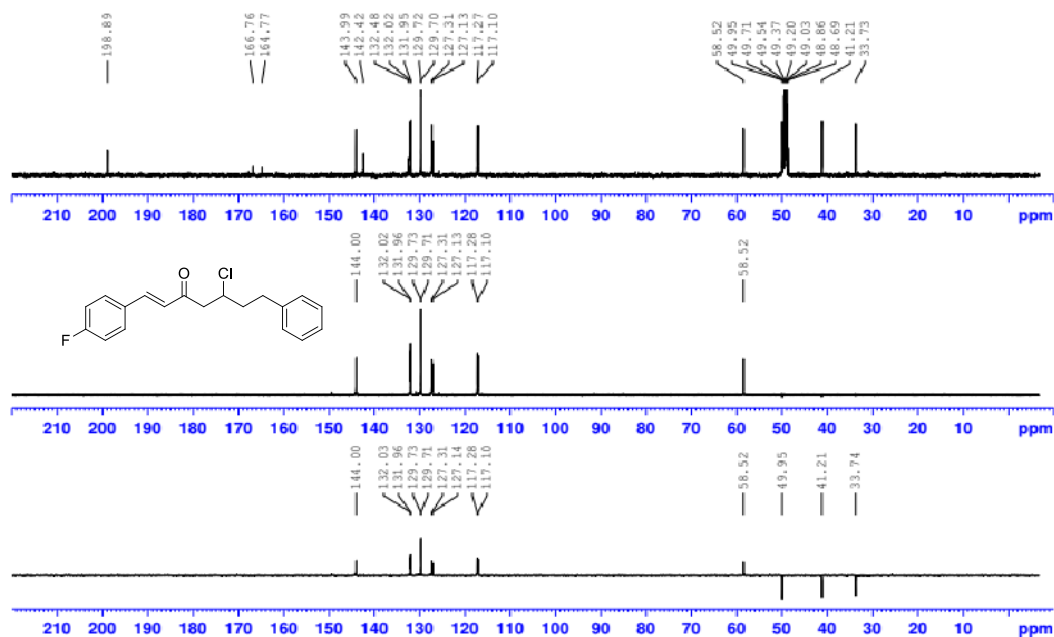

## Compound 20

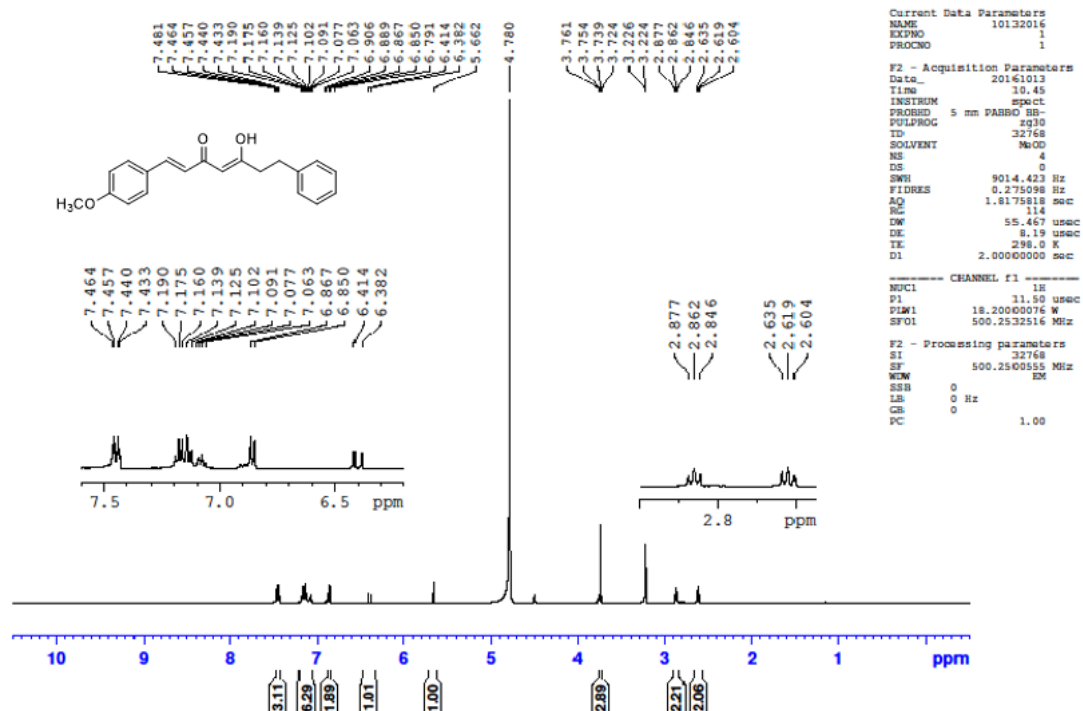

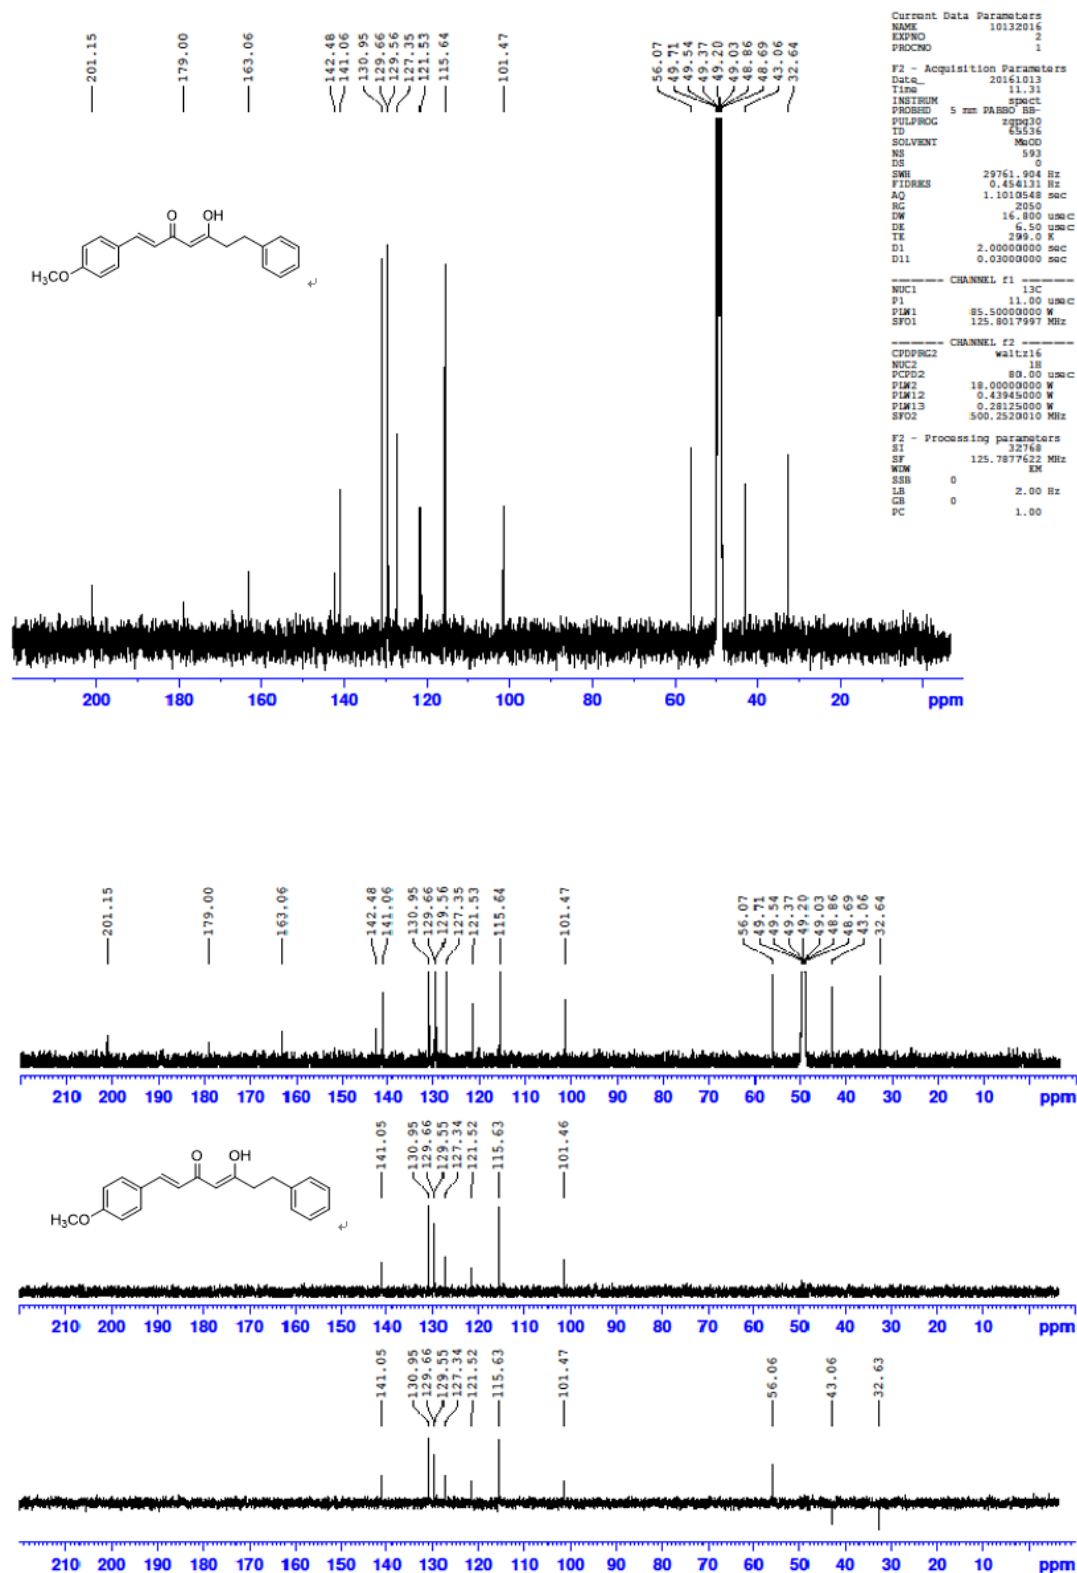

Compound 21

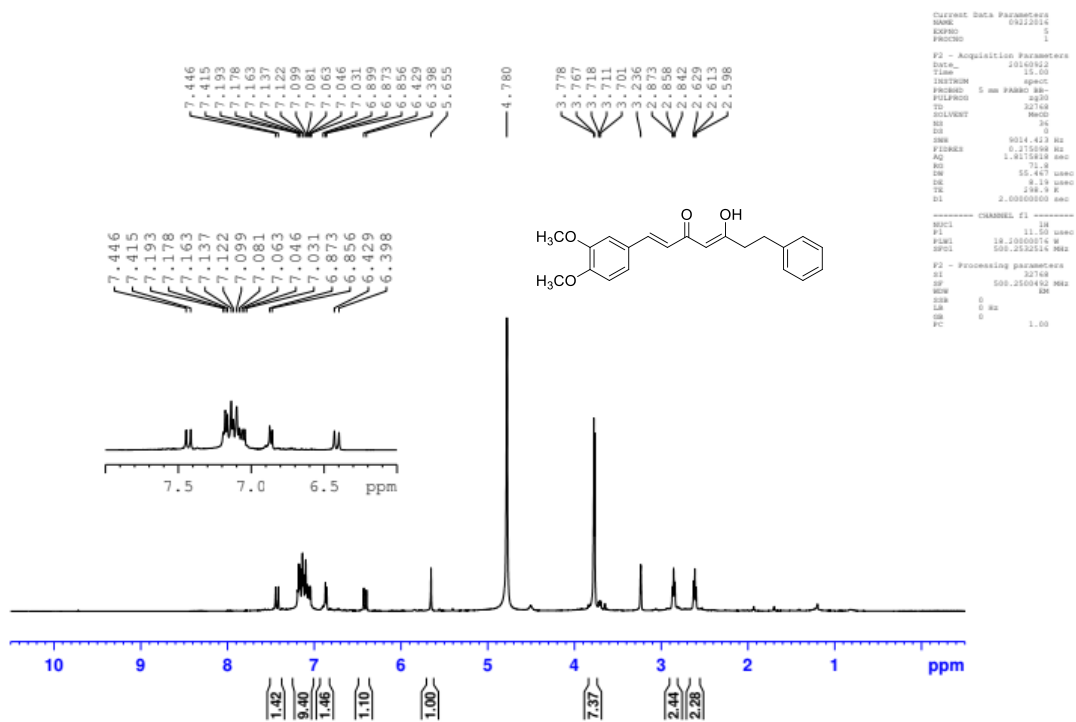

Compound 22

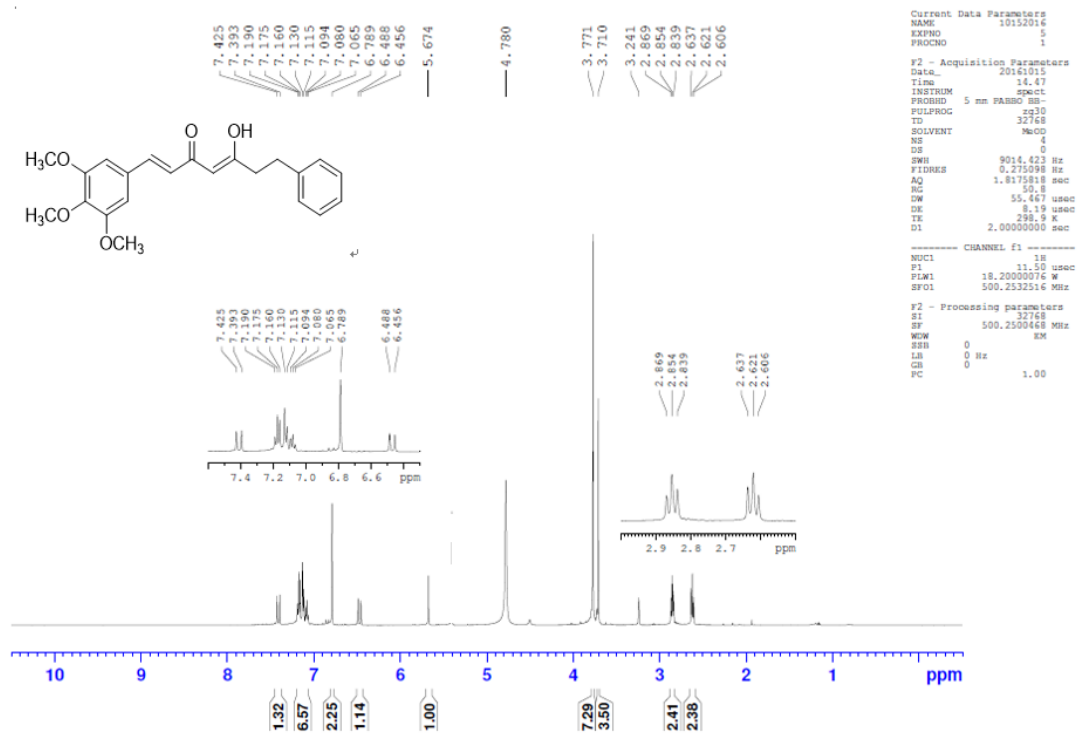

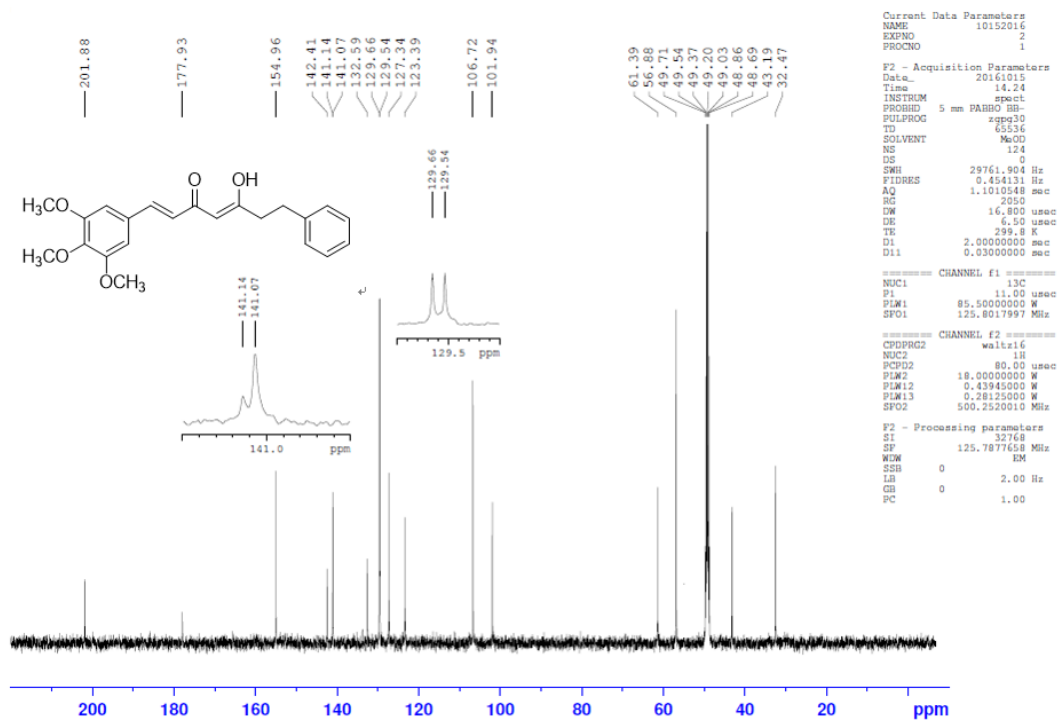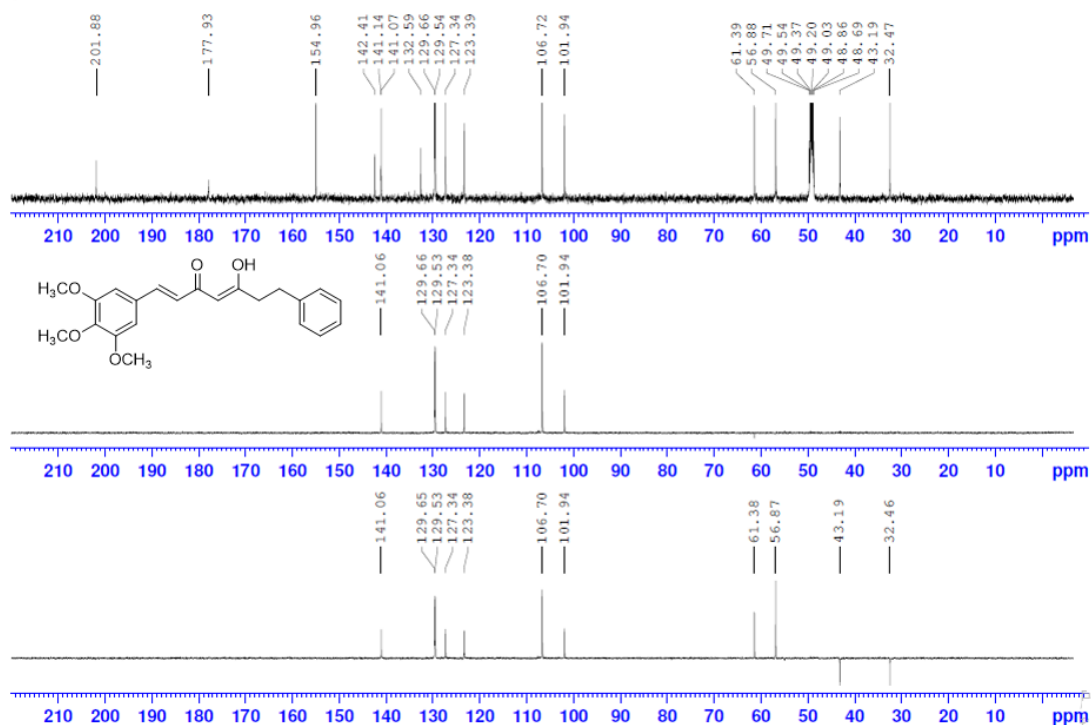

Compound 23



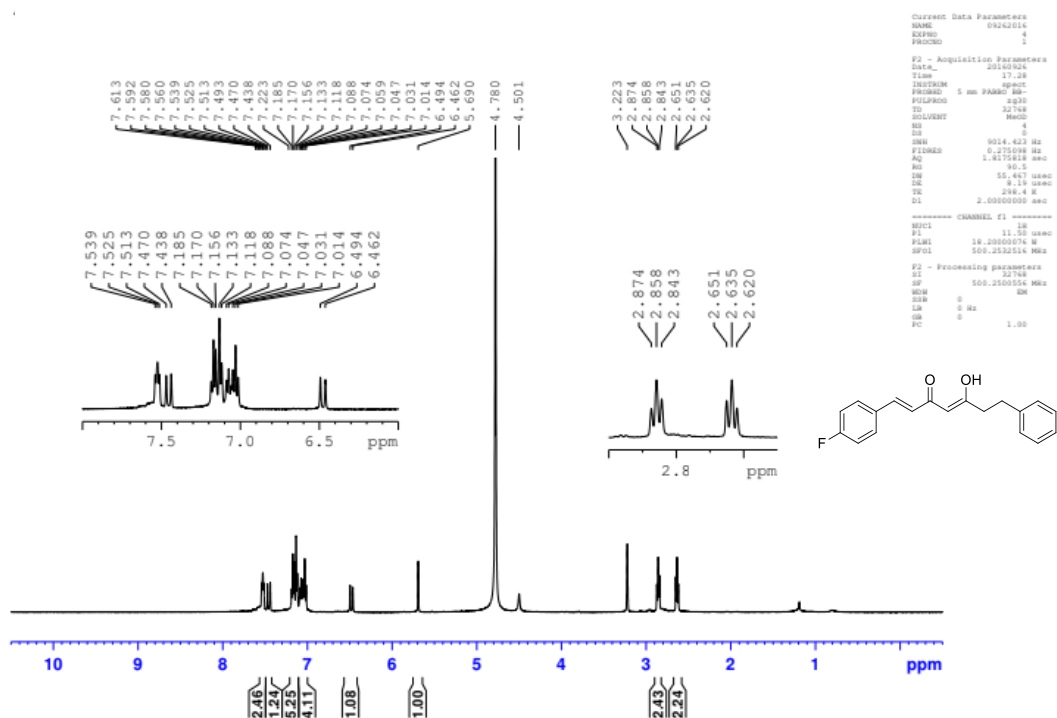

Compound 24

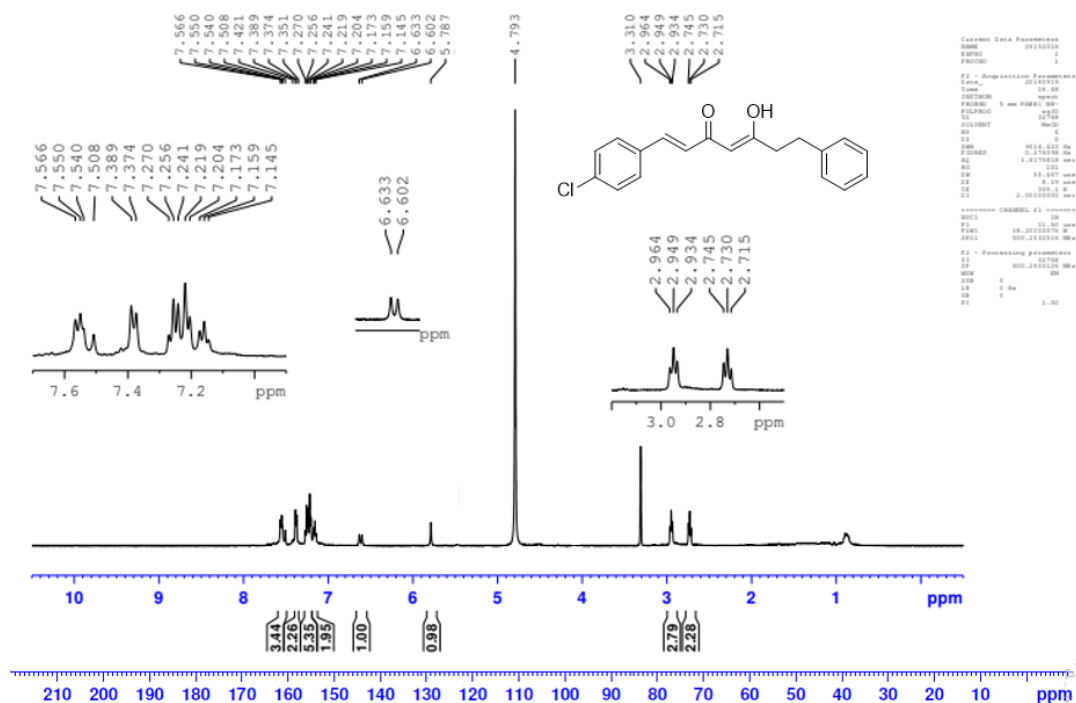

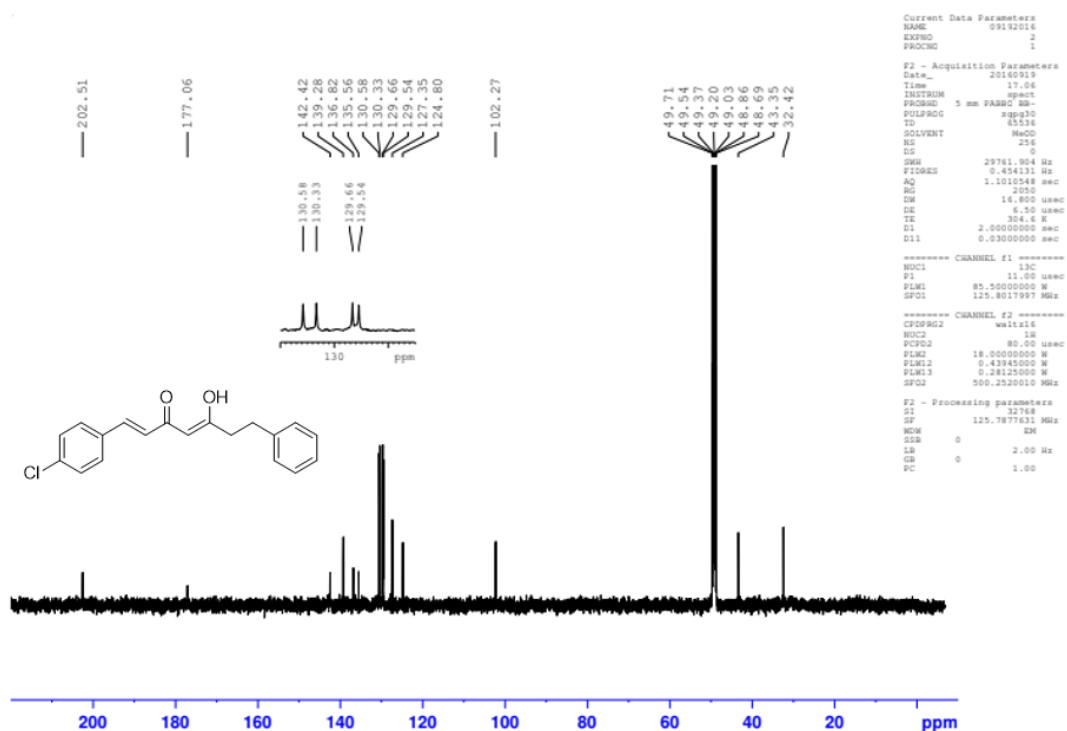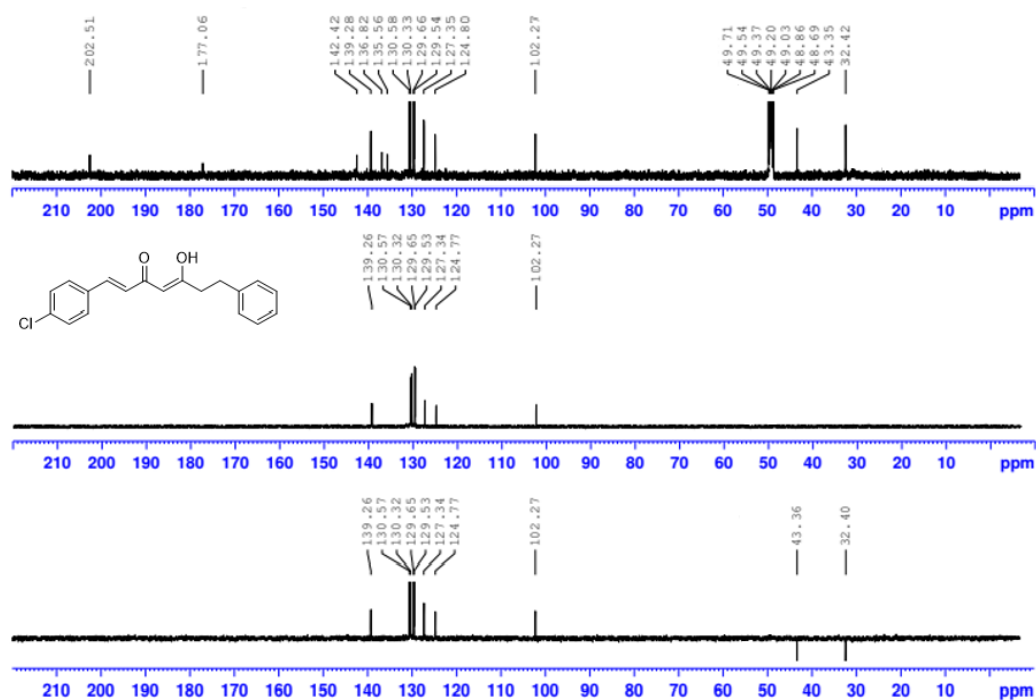

MD1

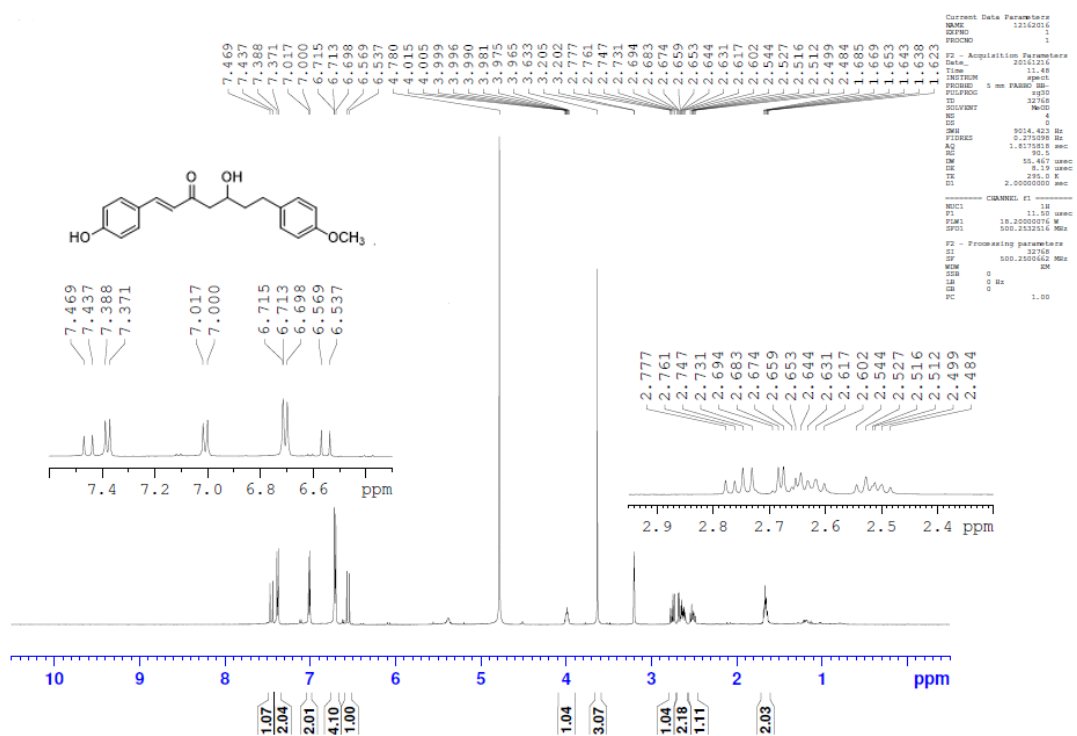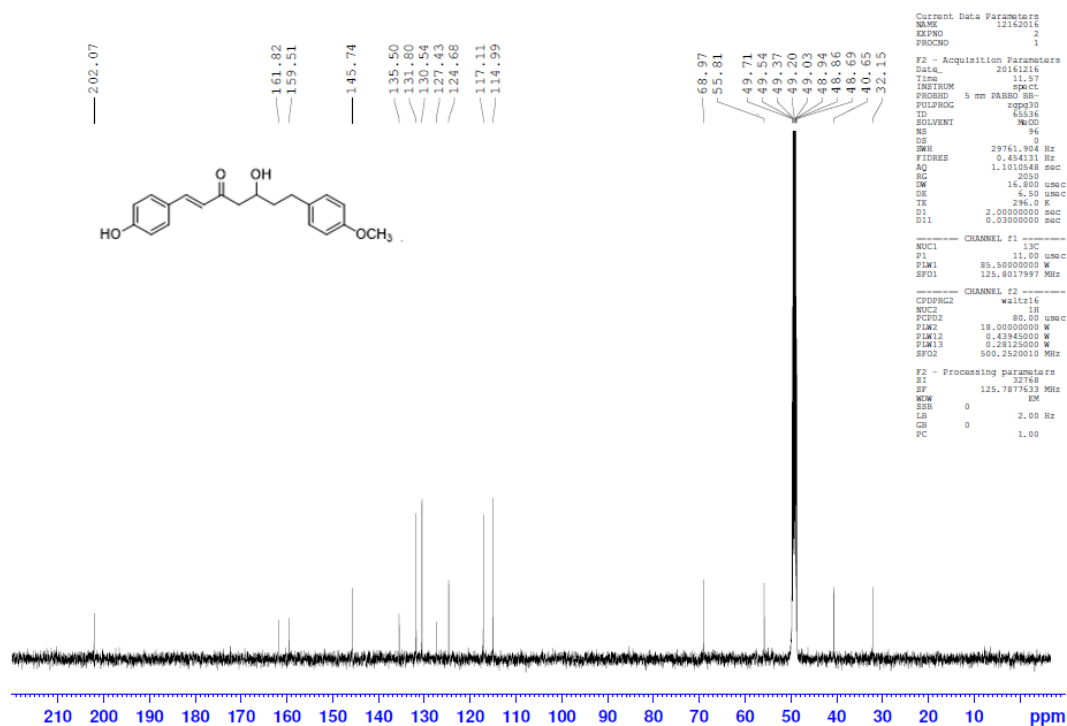

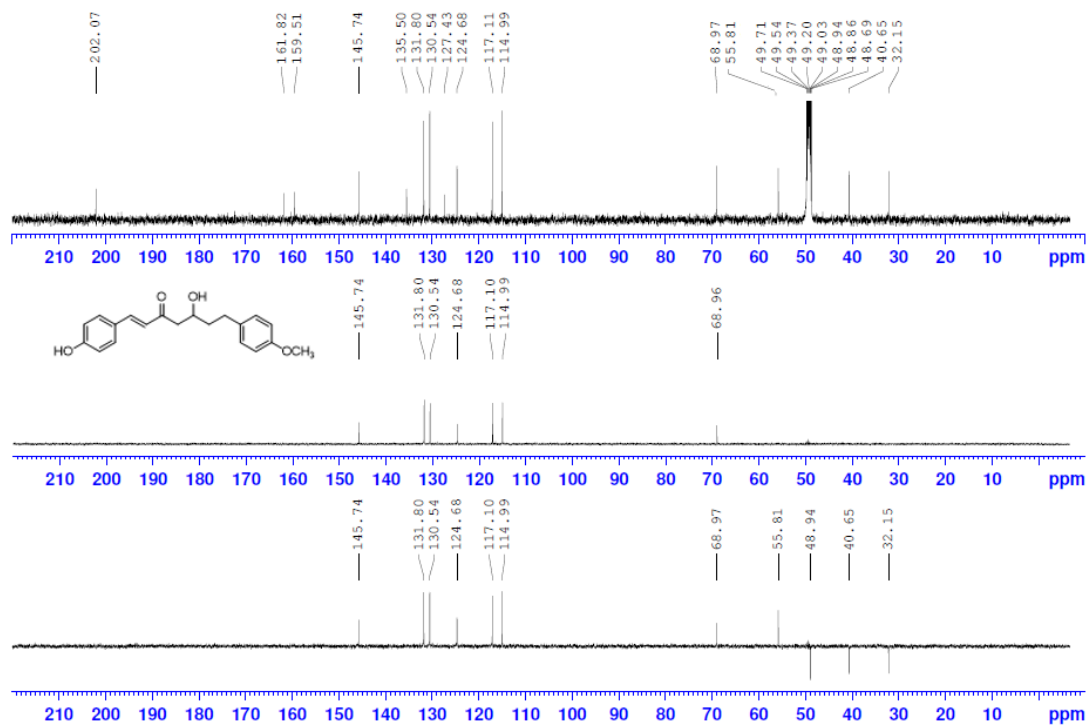

## MD1a

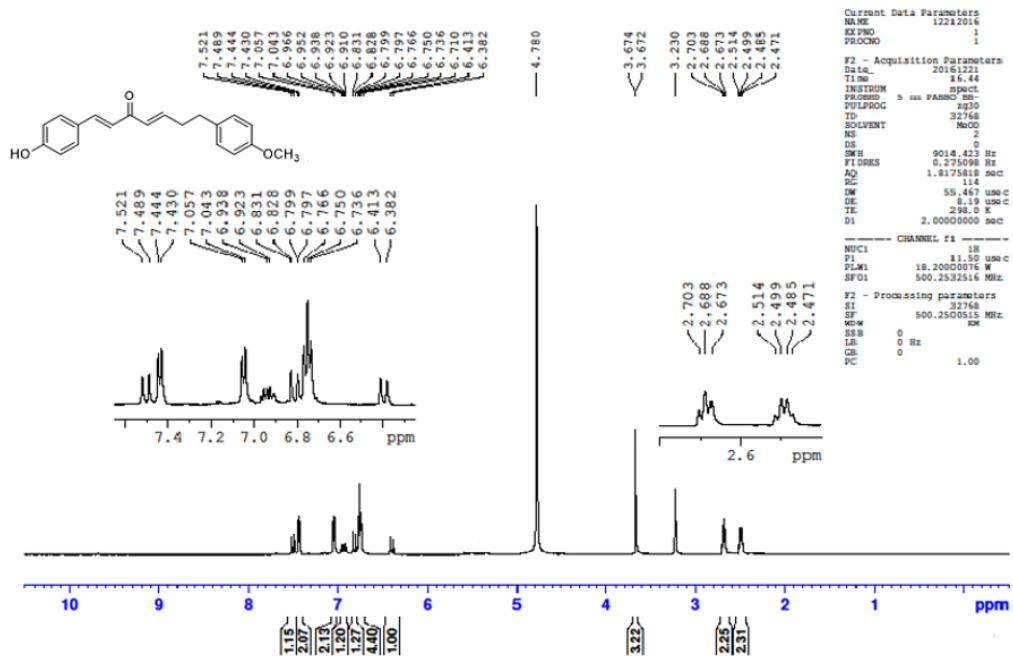

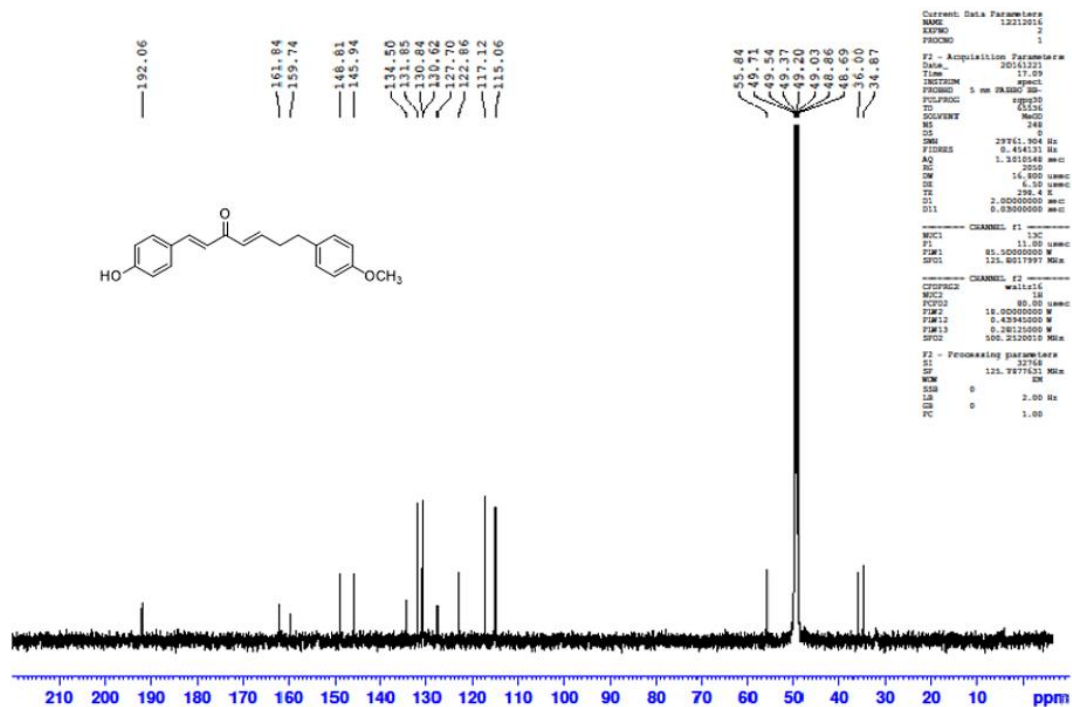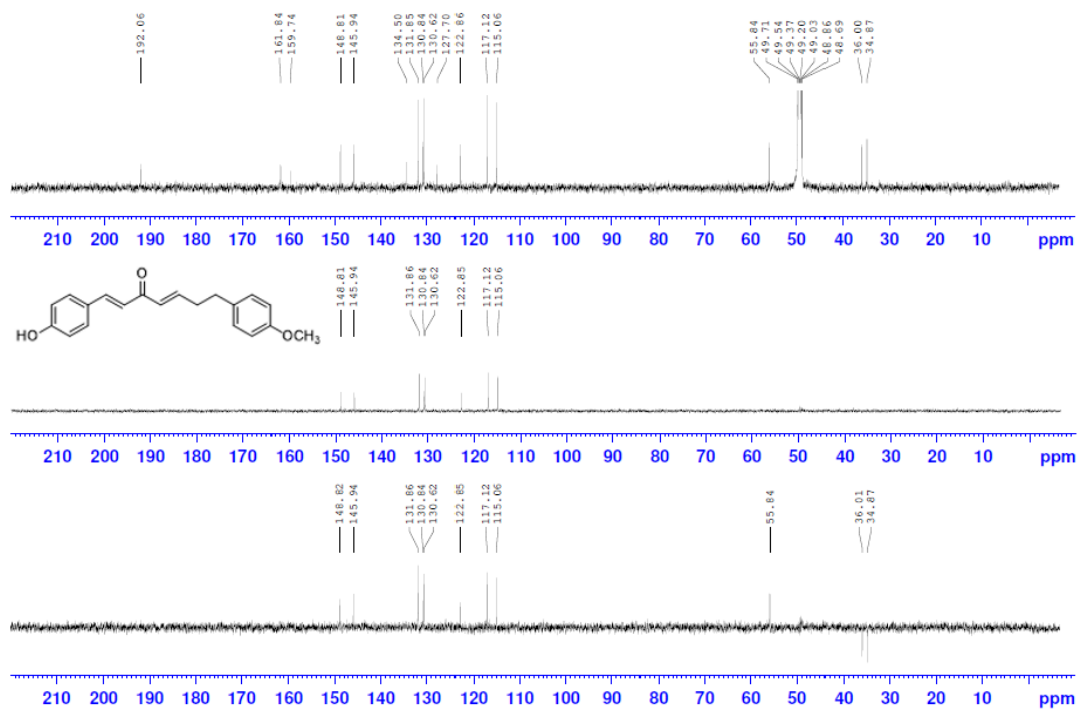

MD2

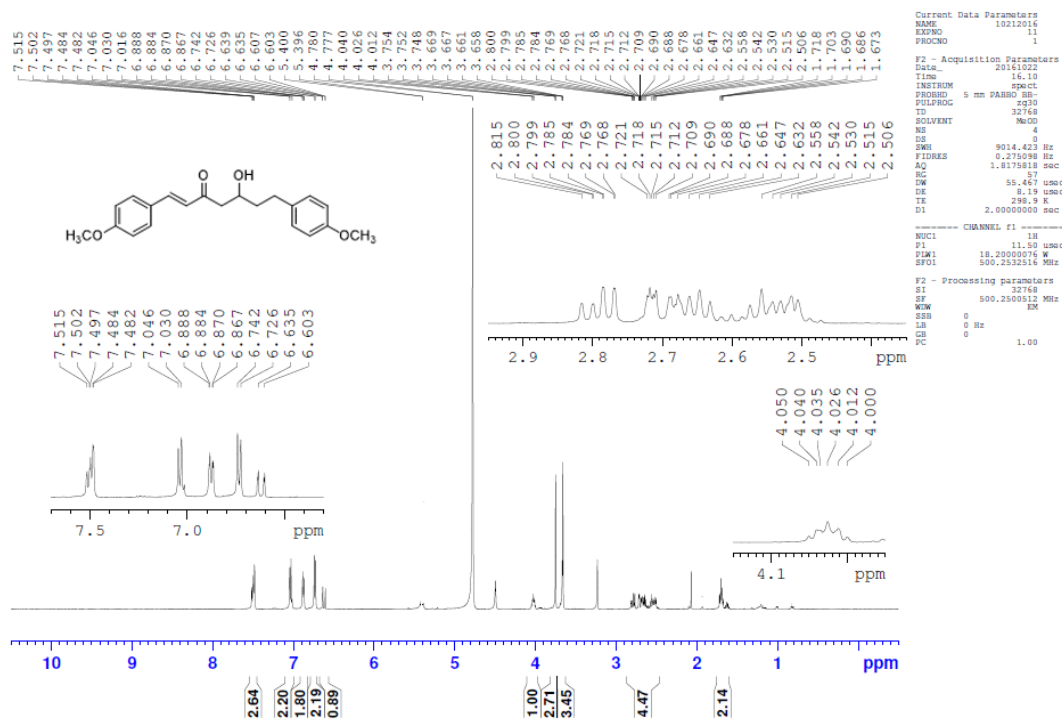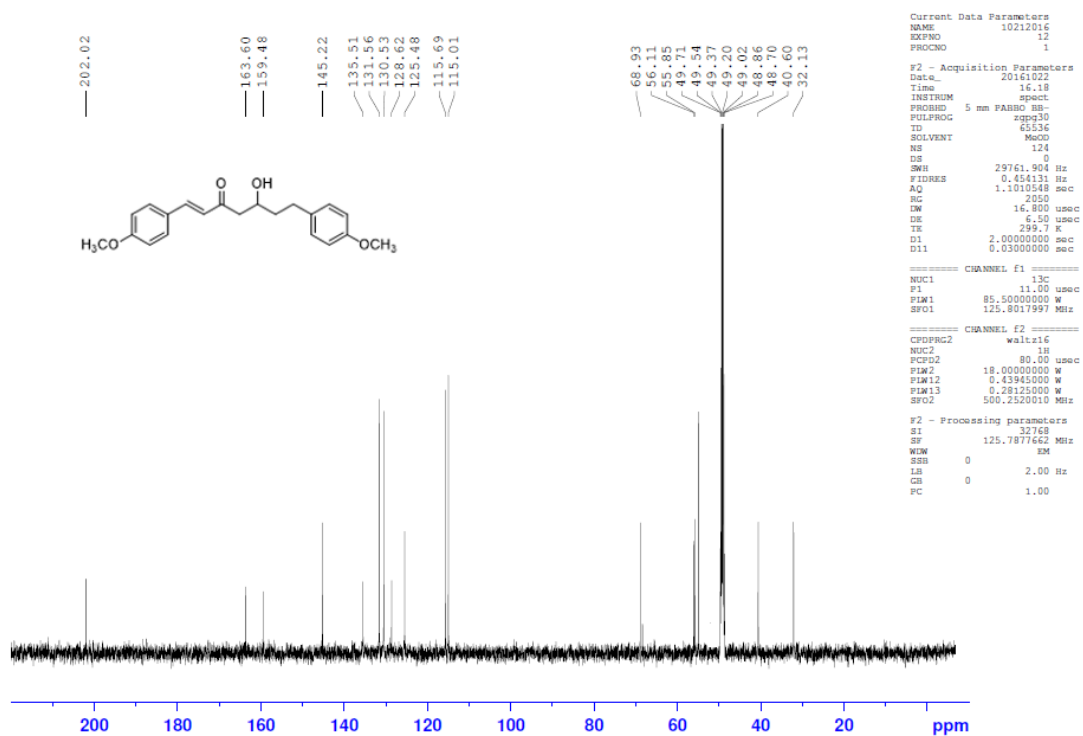

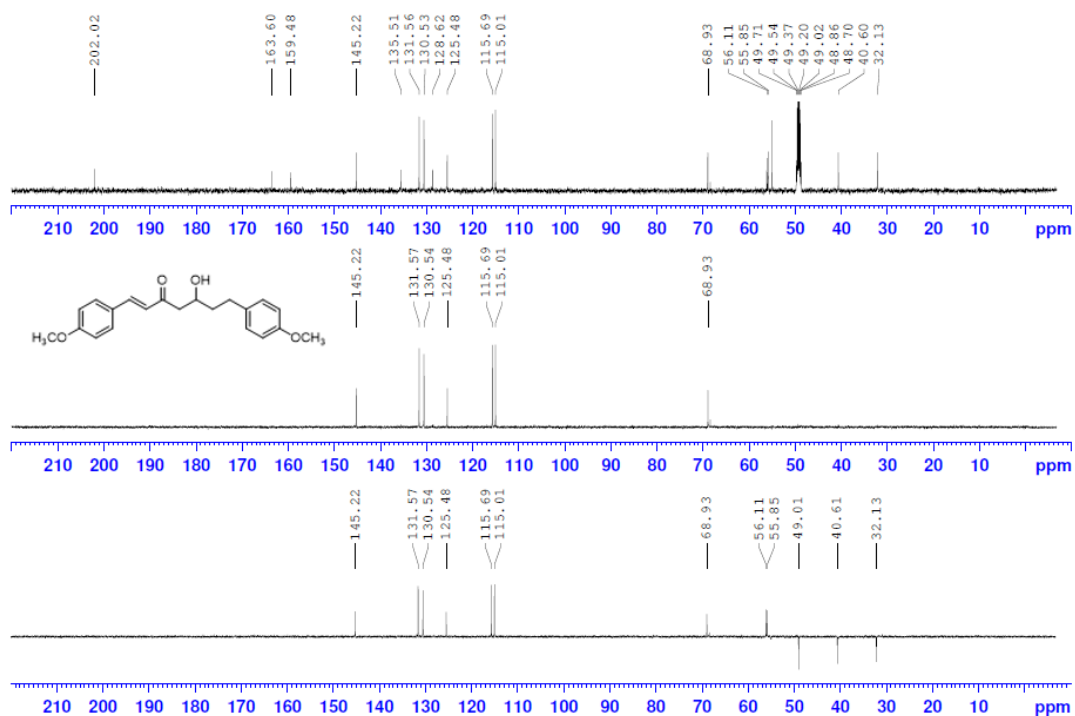

## MD2a

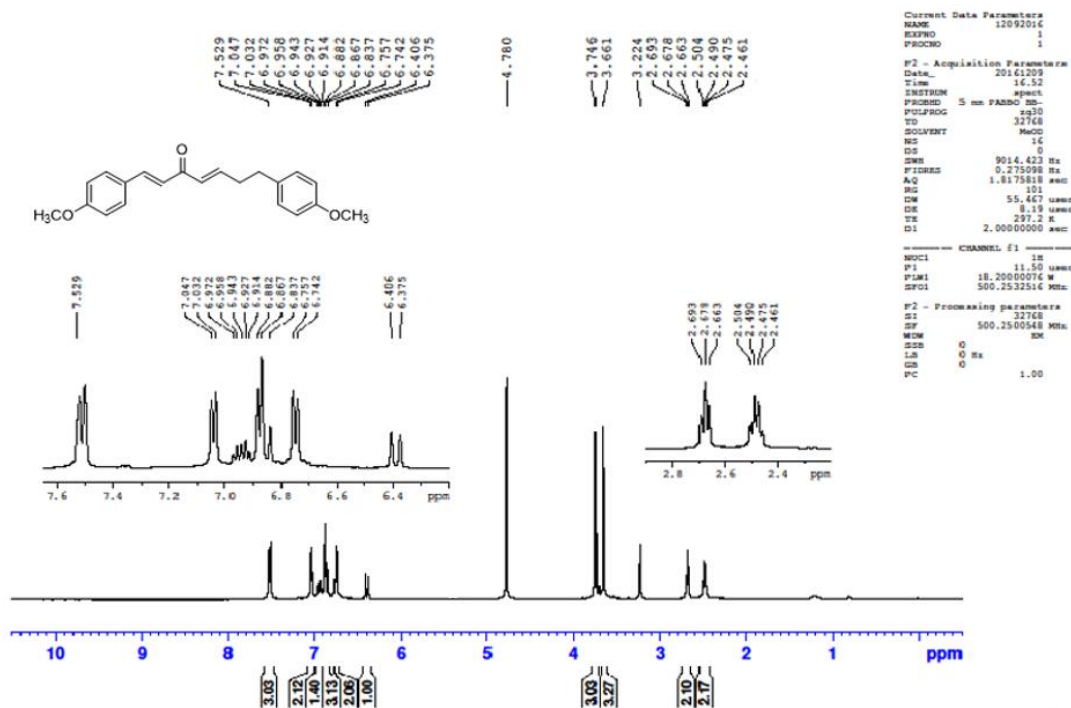

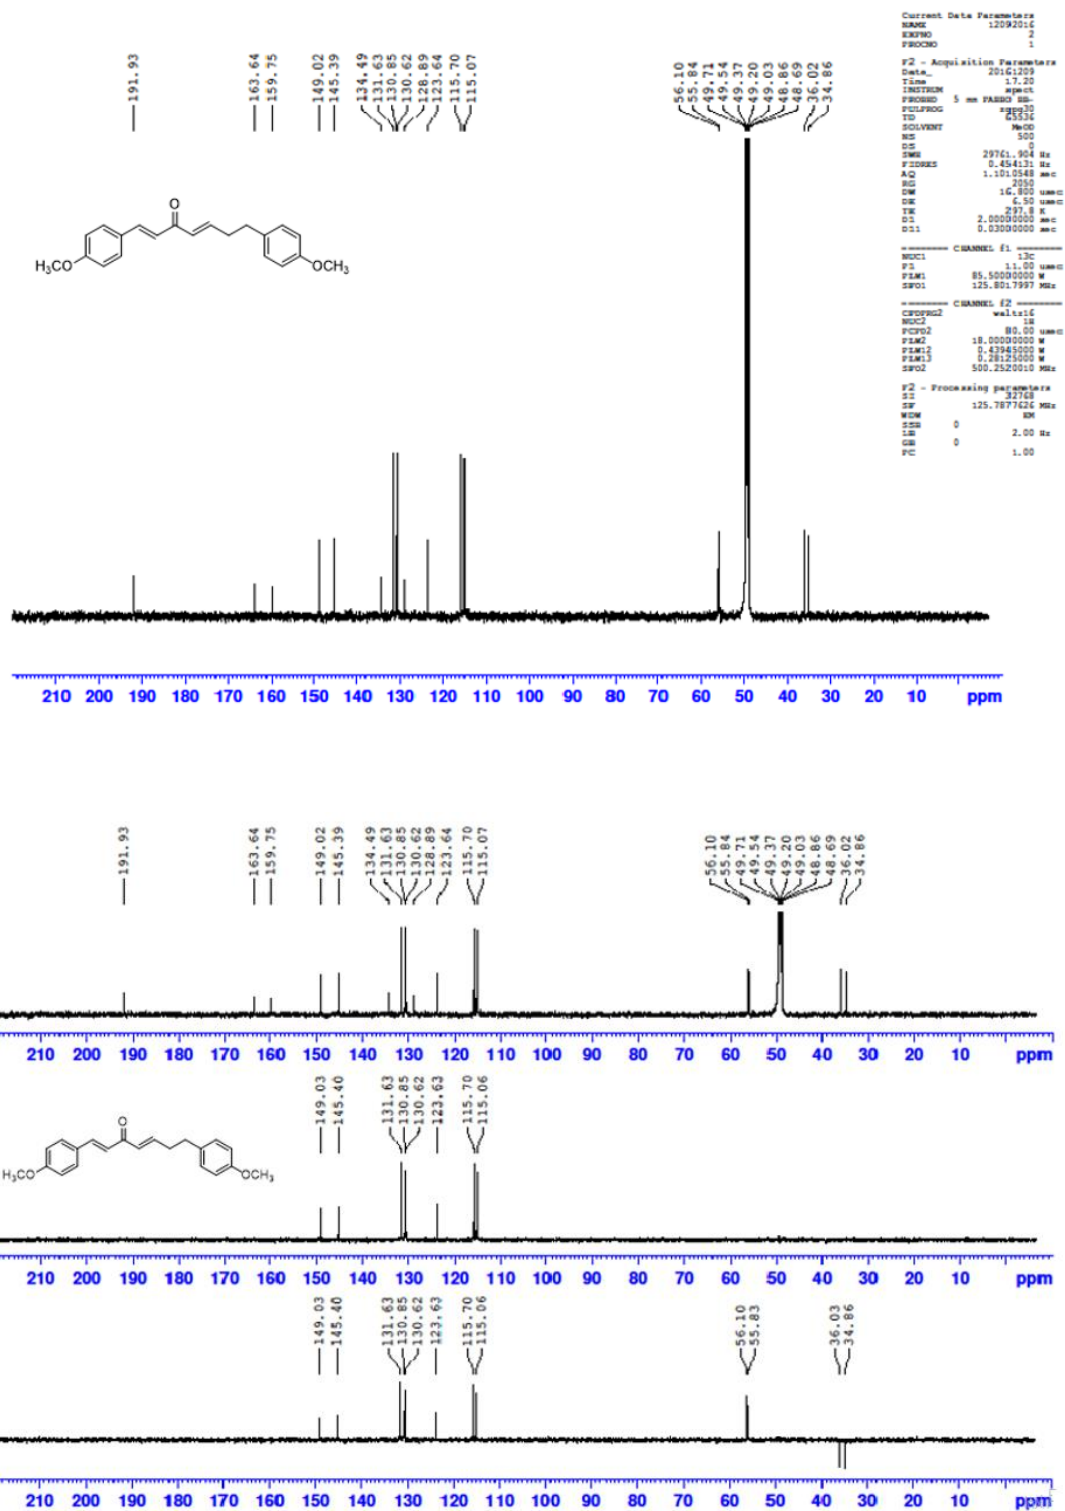

MD3



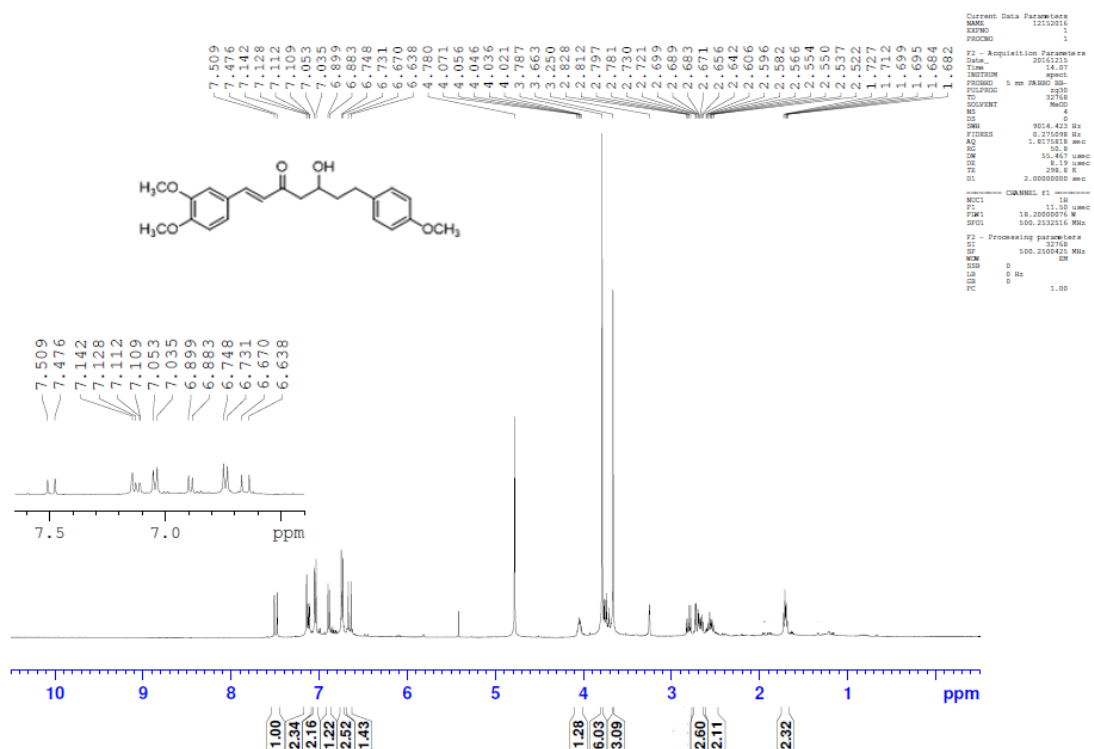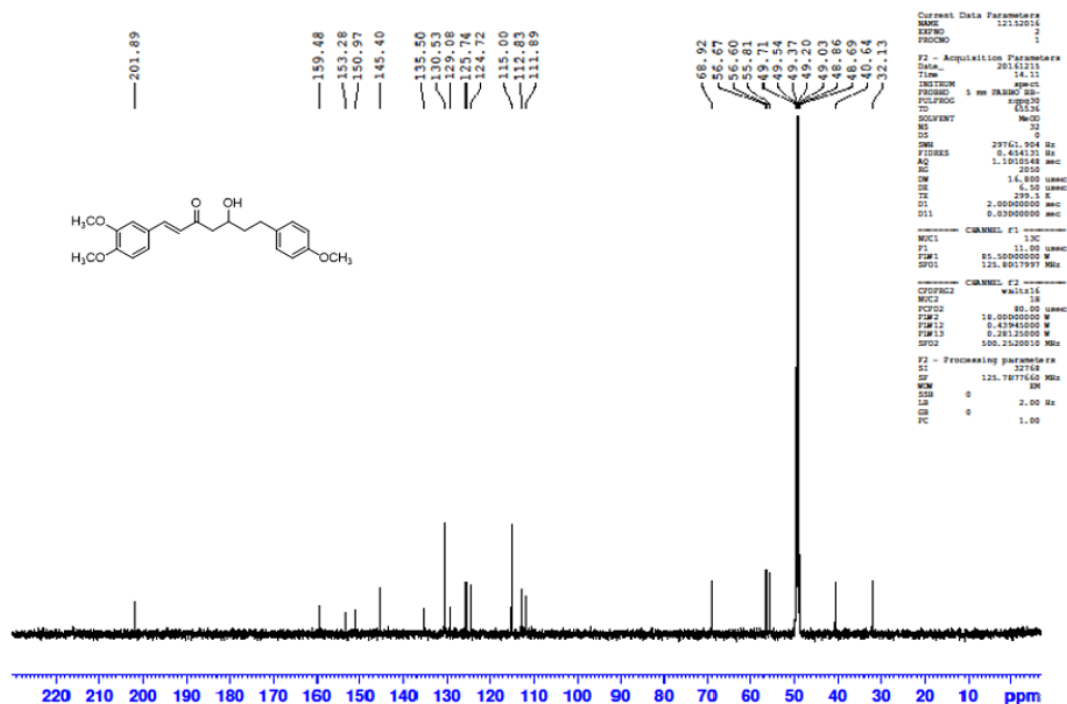

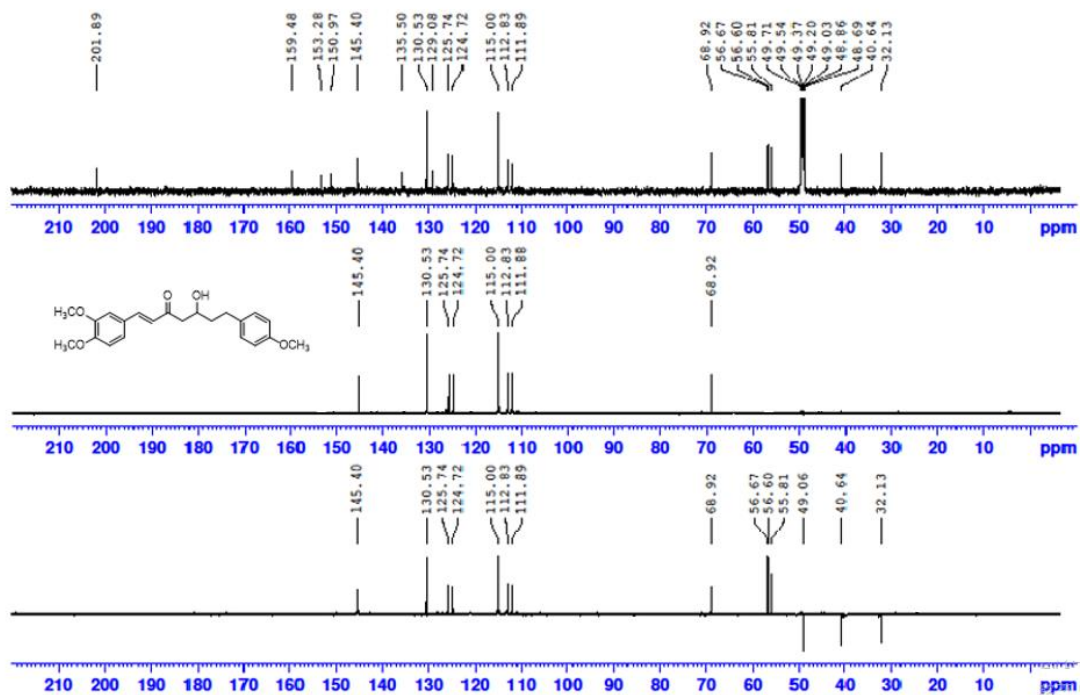

## MD3a

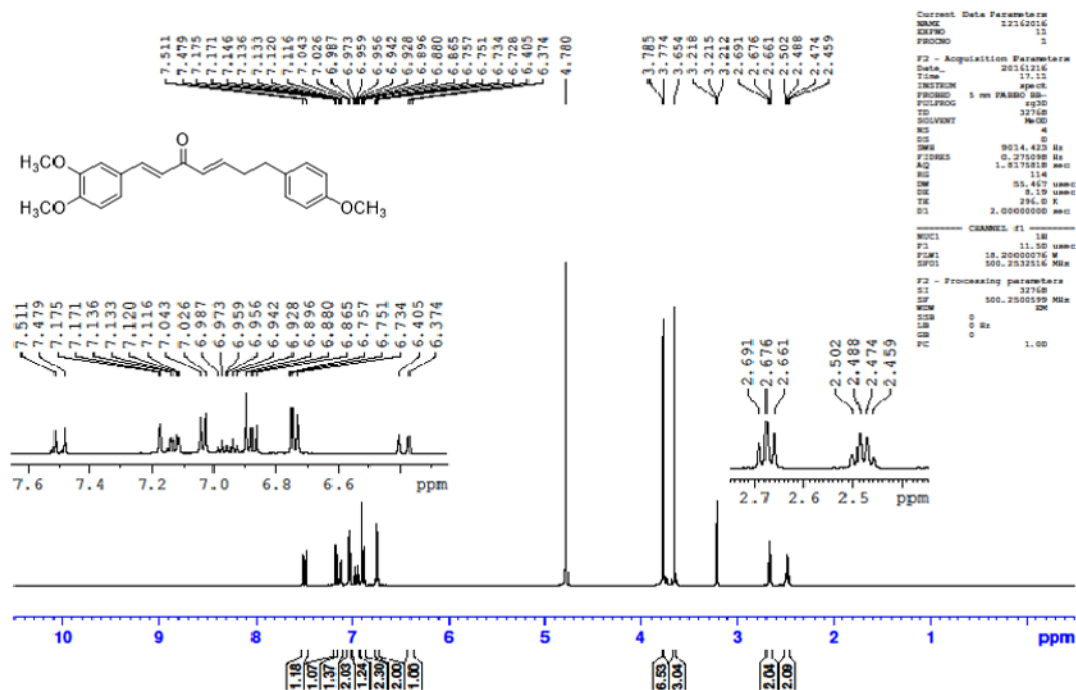

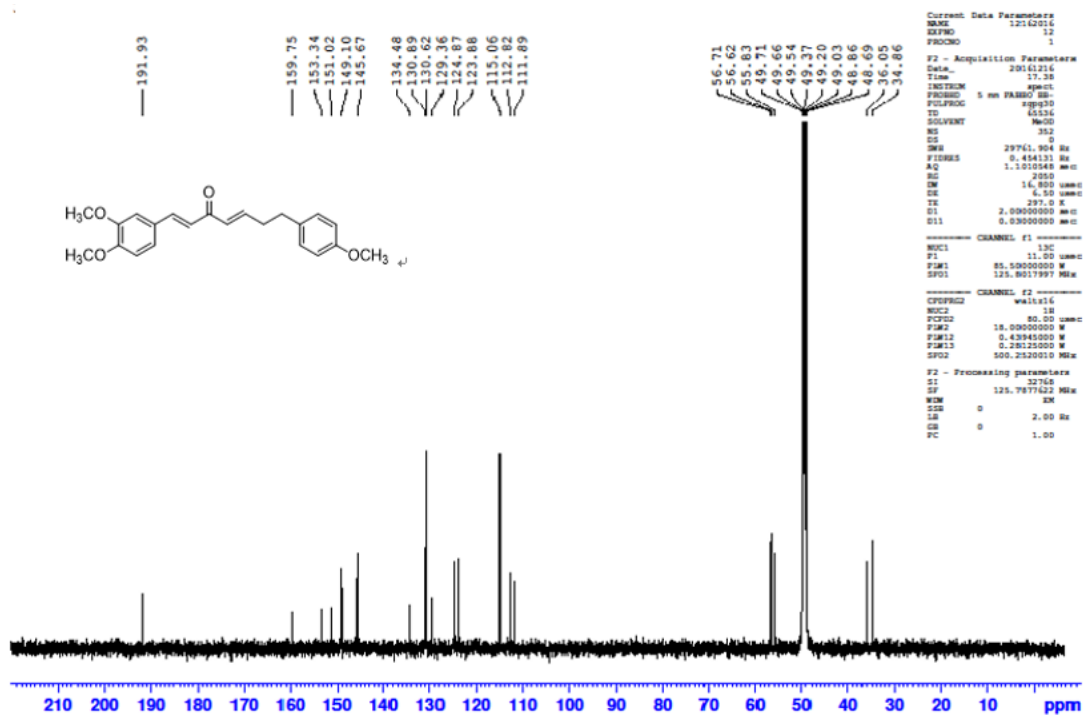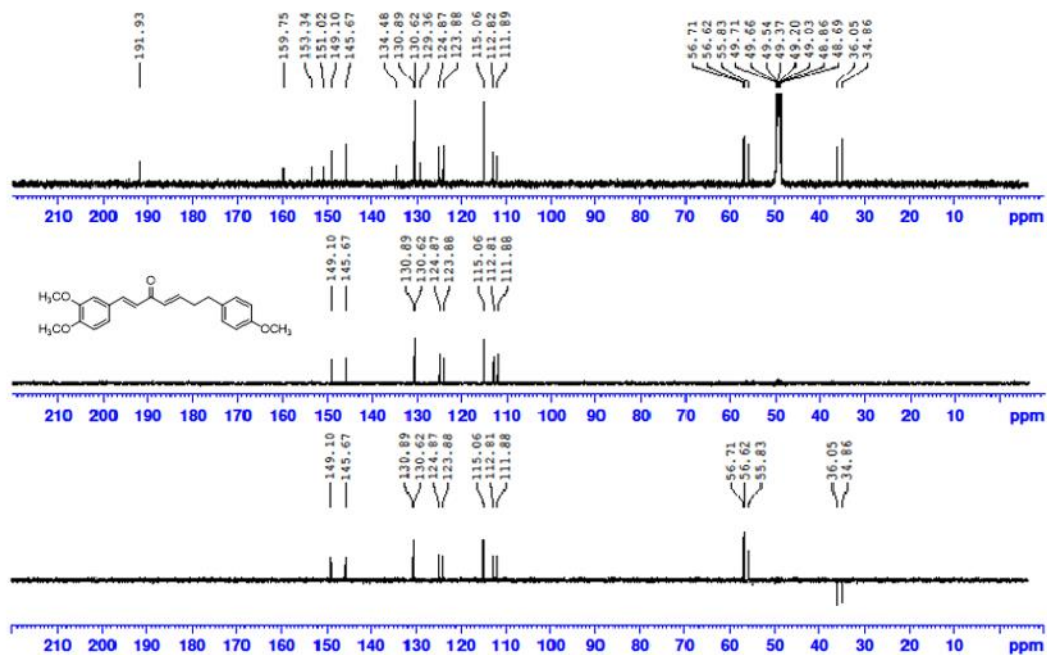

MD4

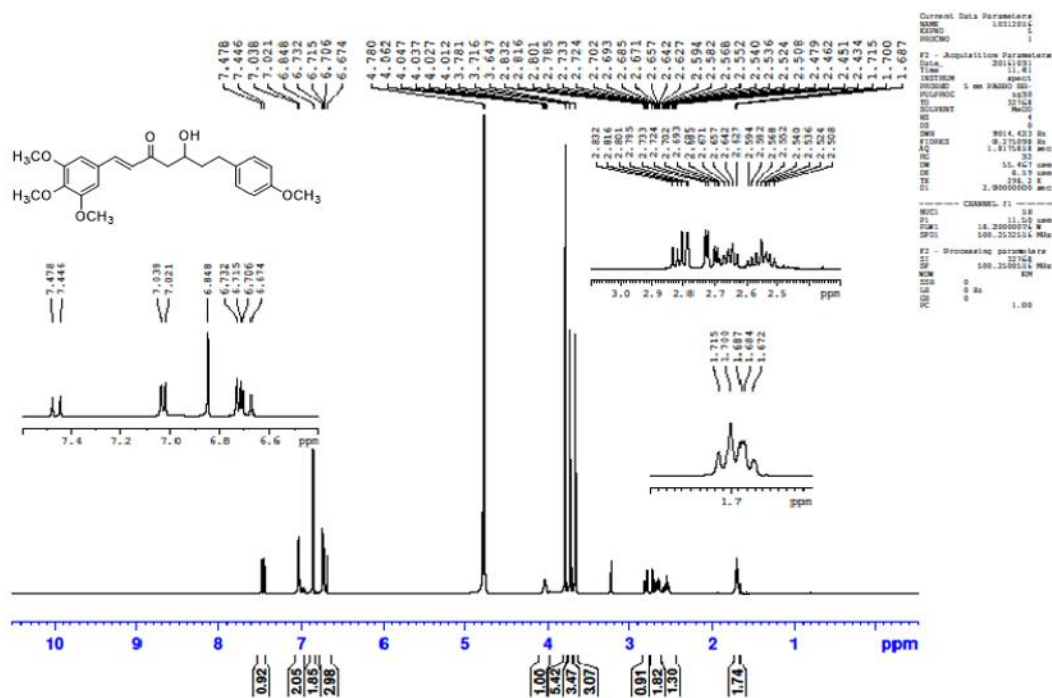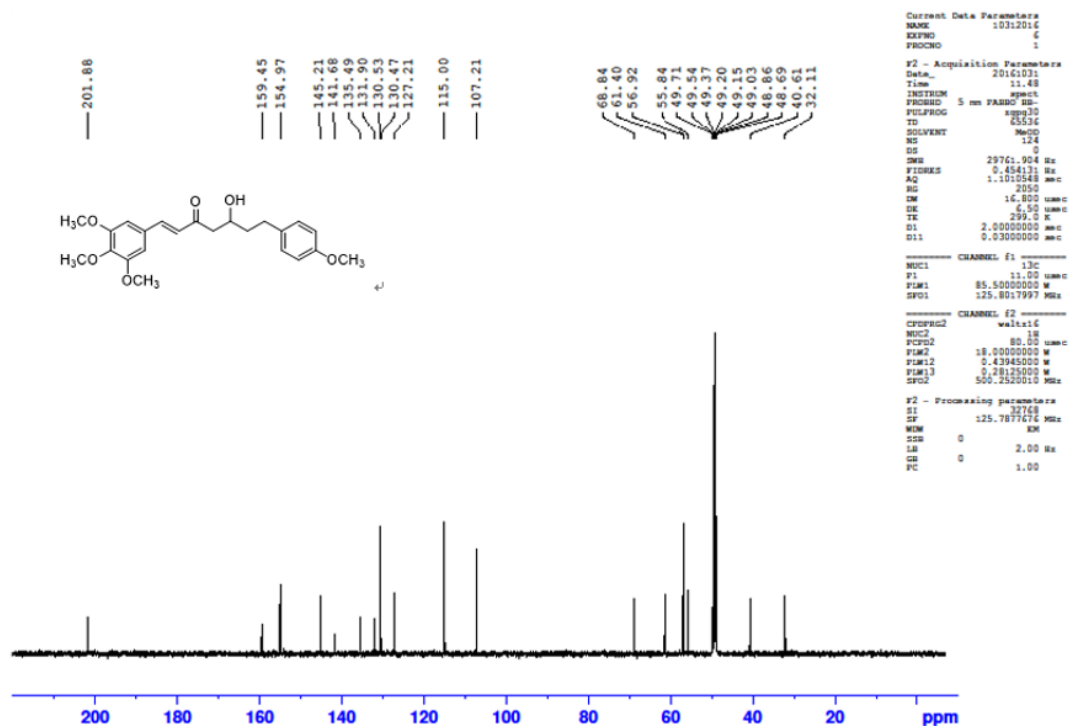

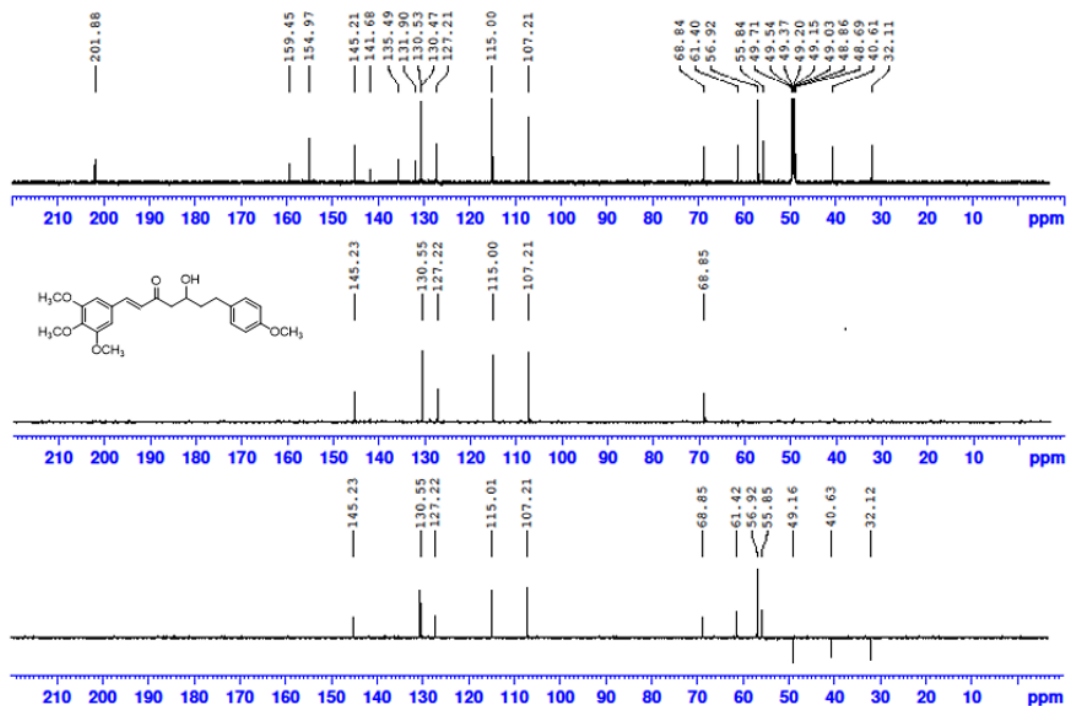

## MD4a

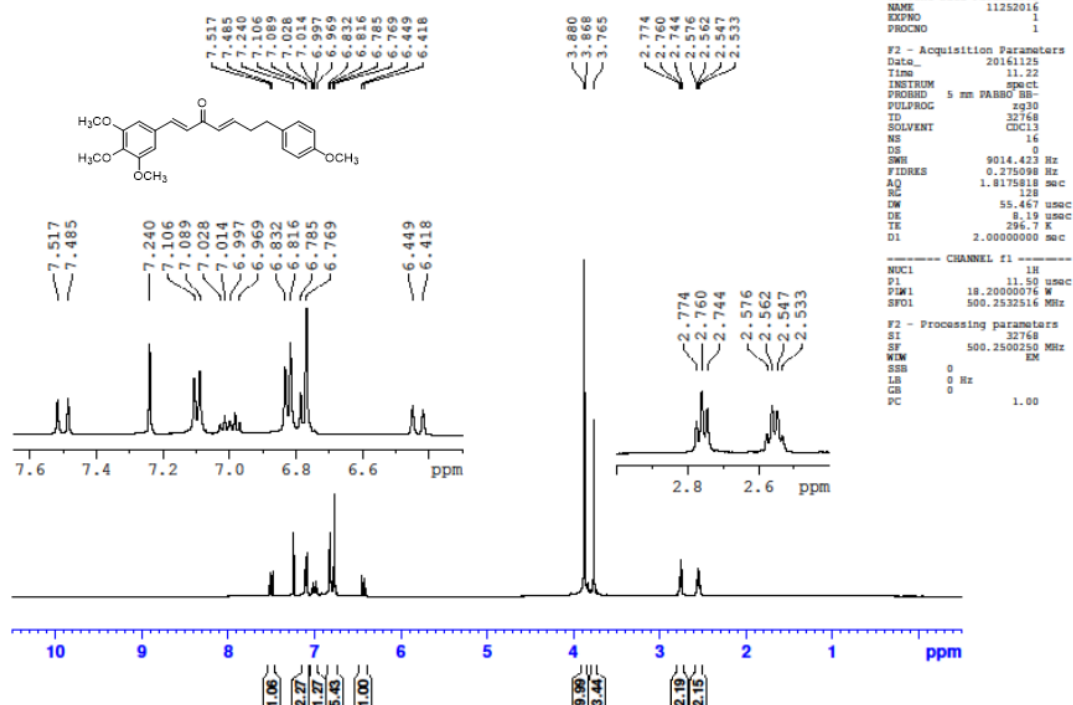

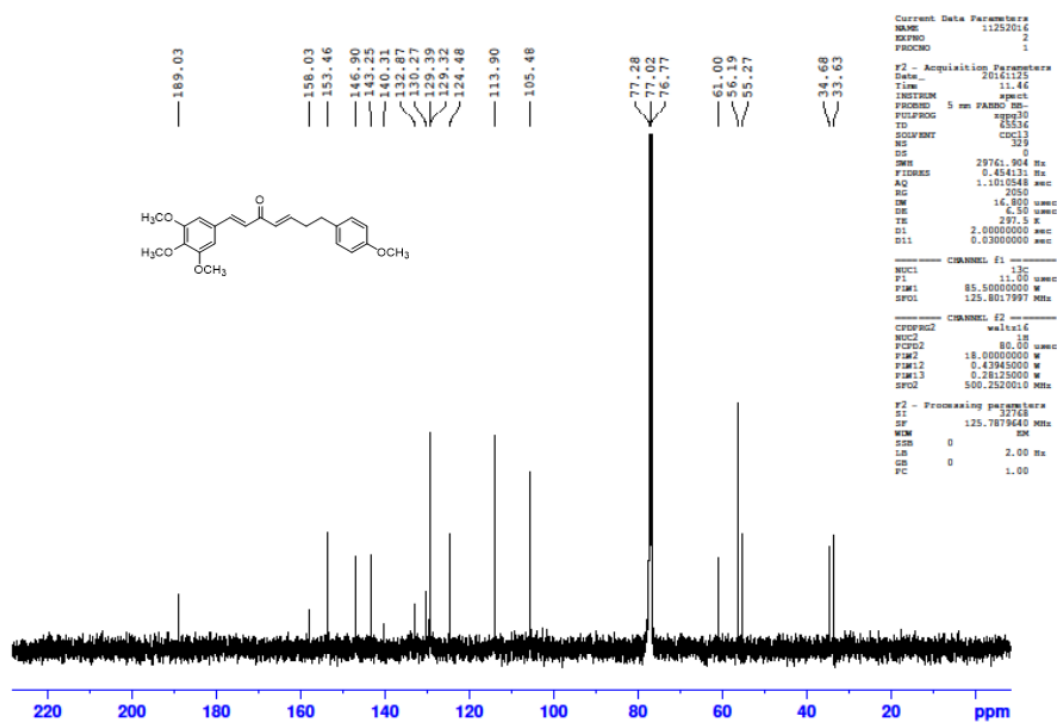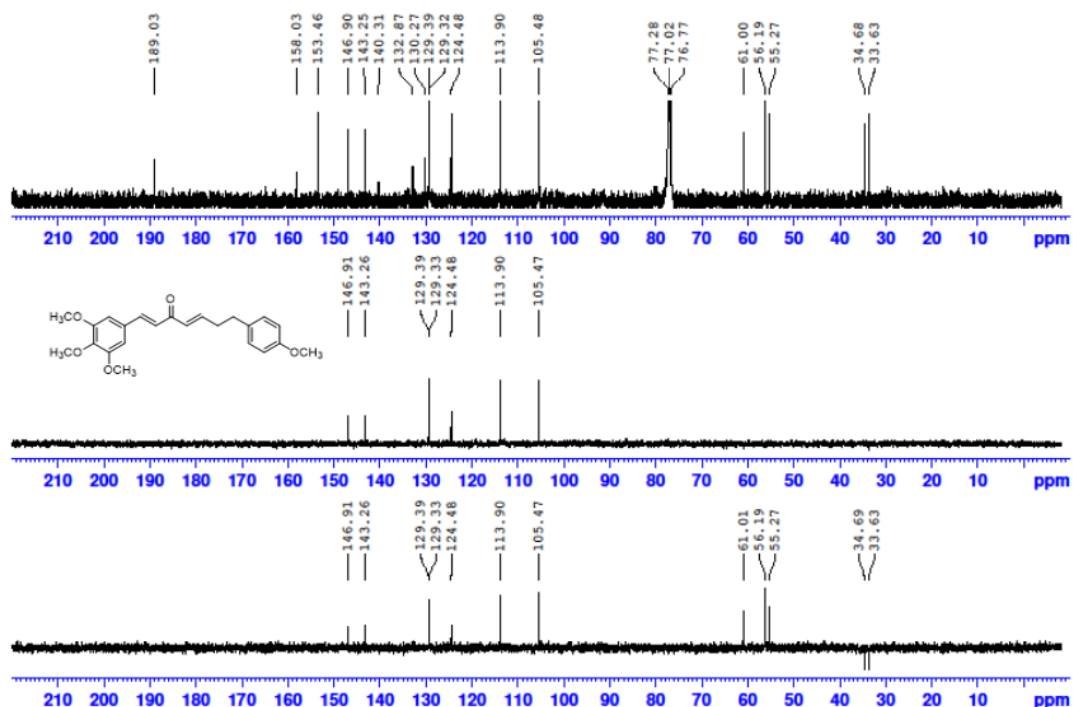

MD5

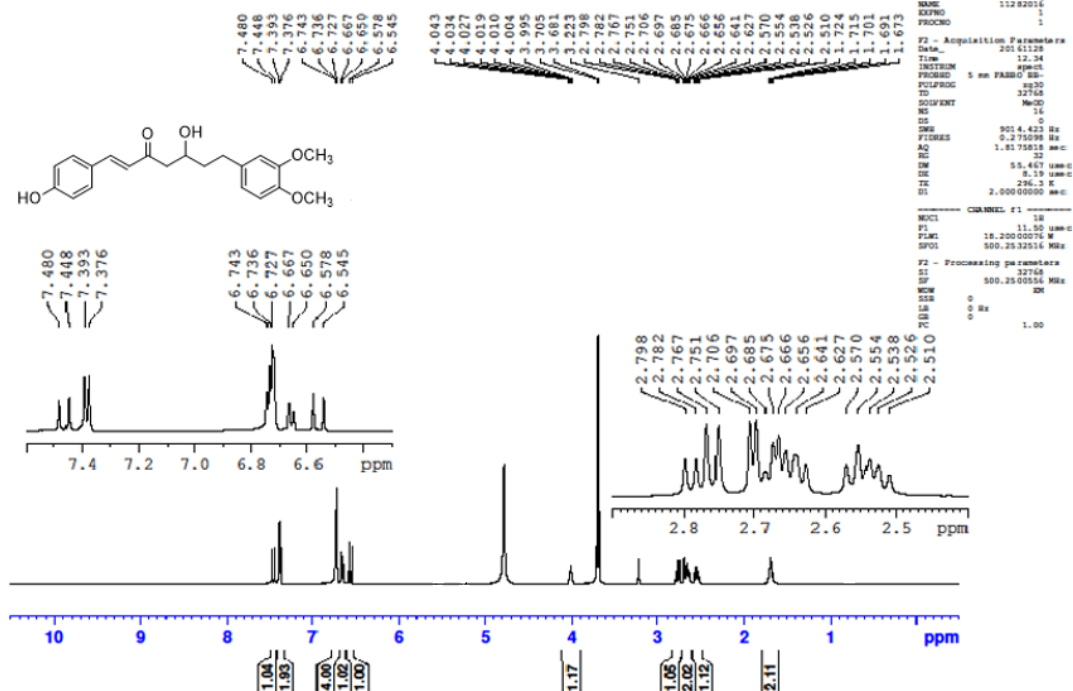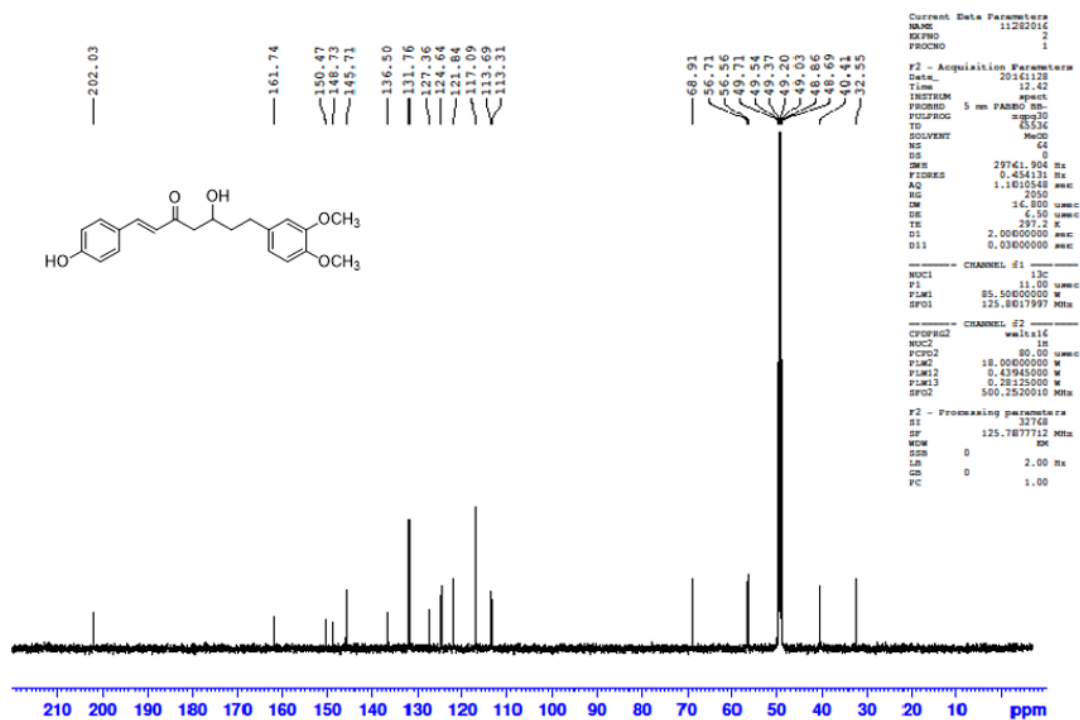



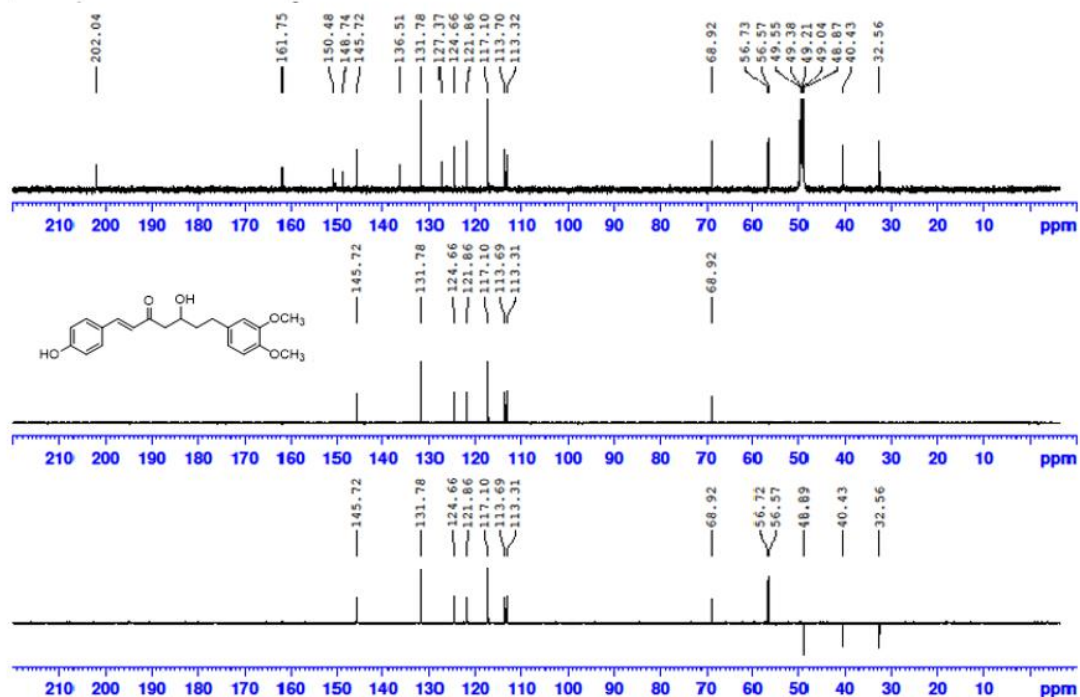

## MD5a

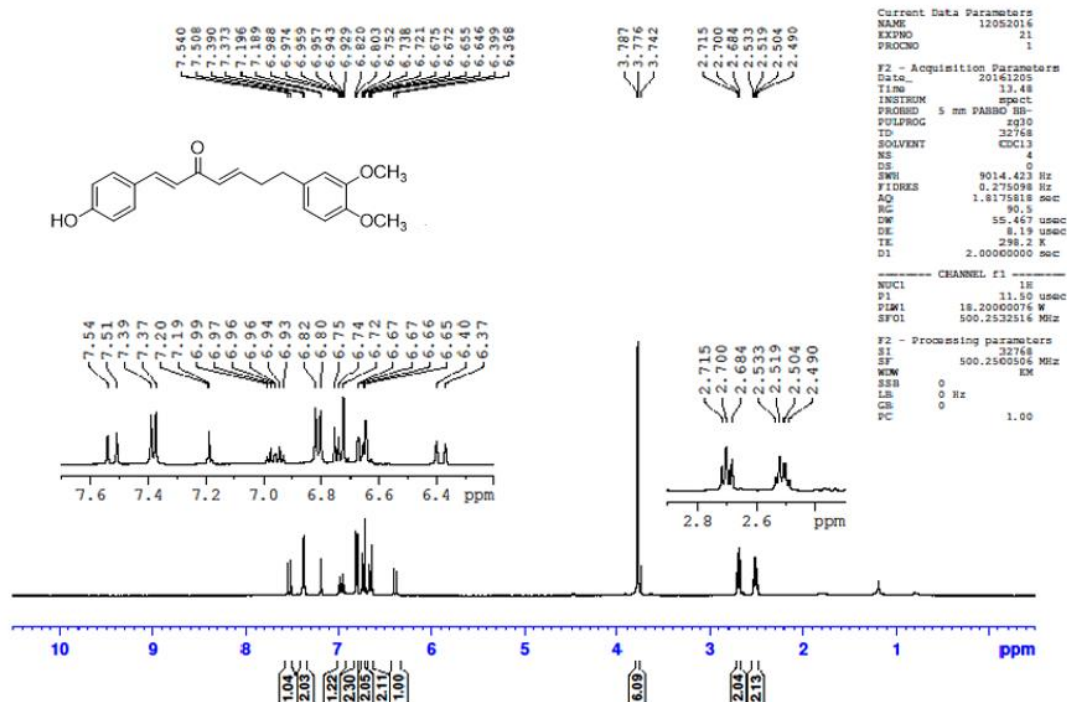



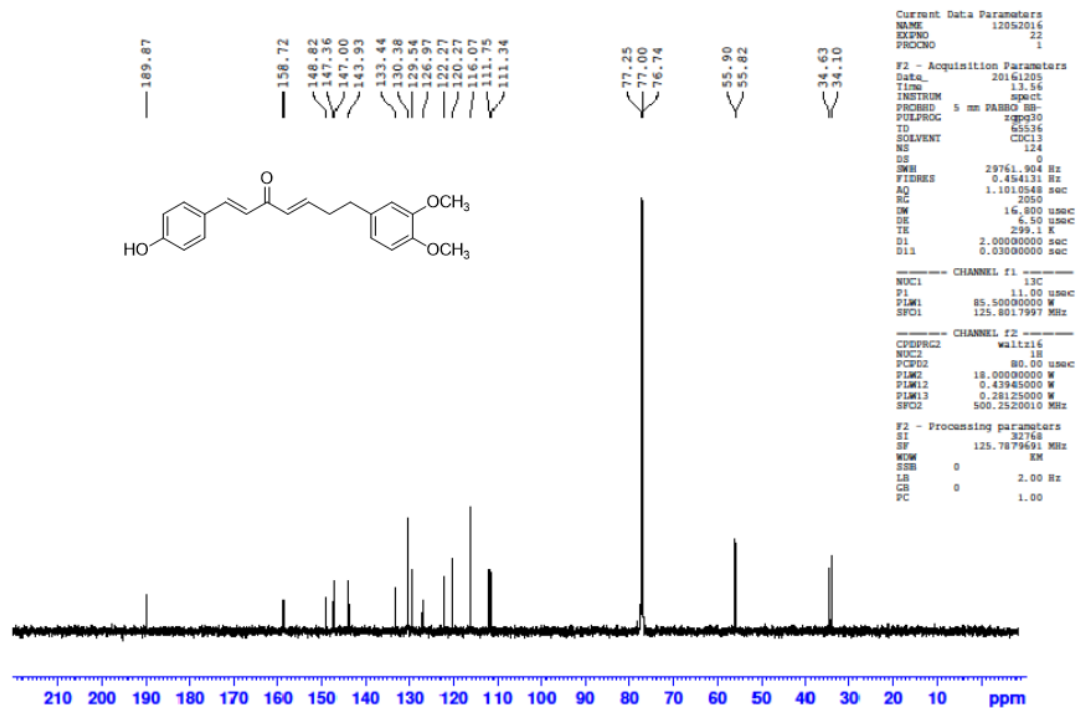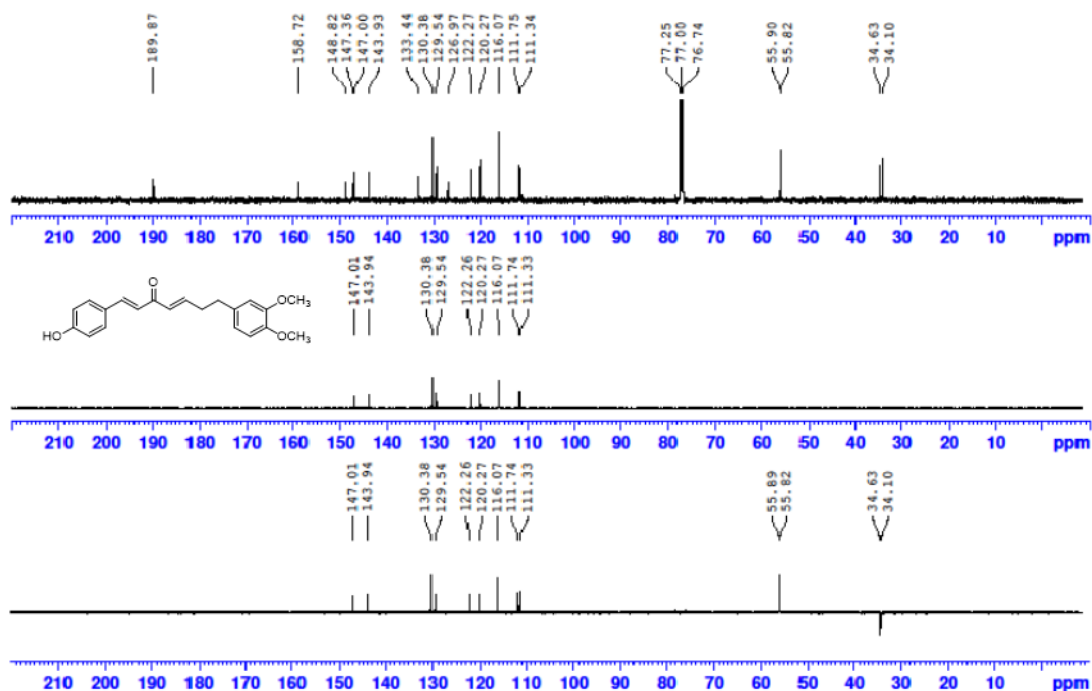

MD6

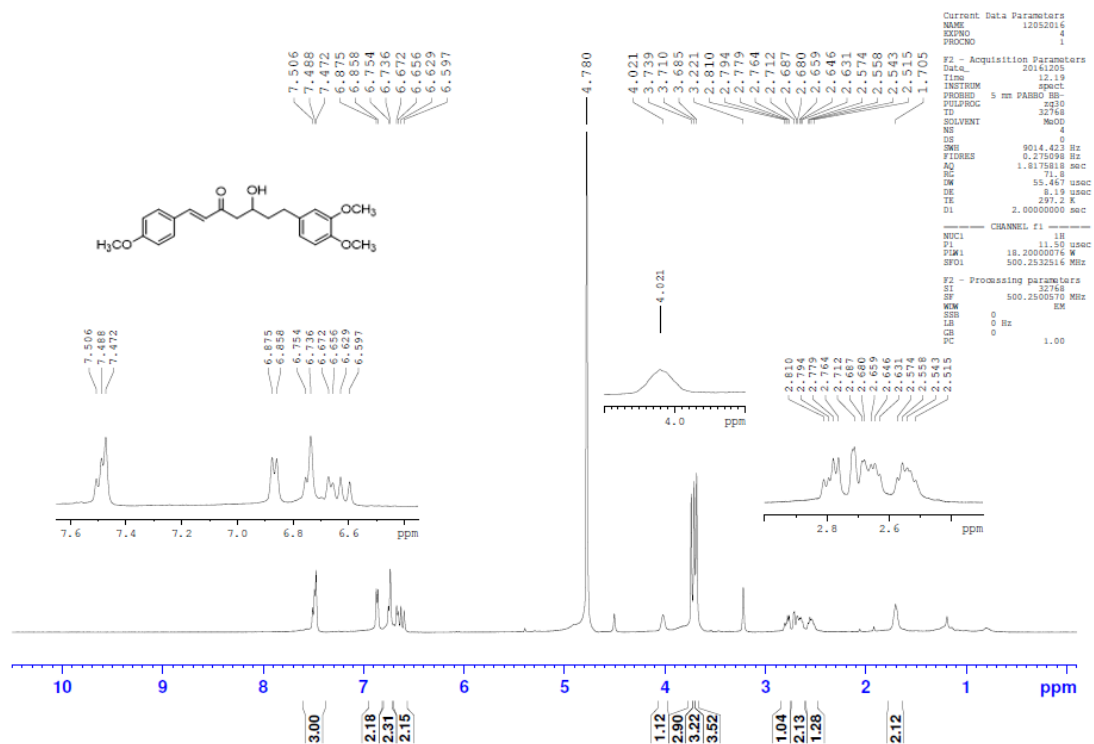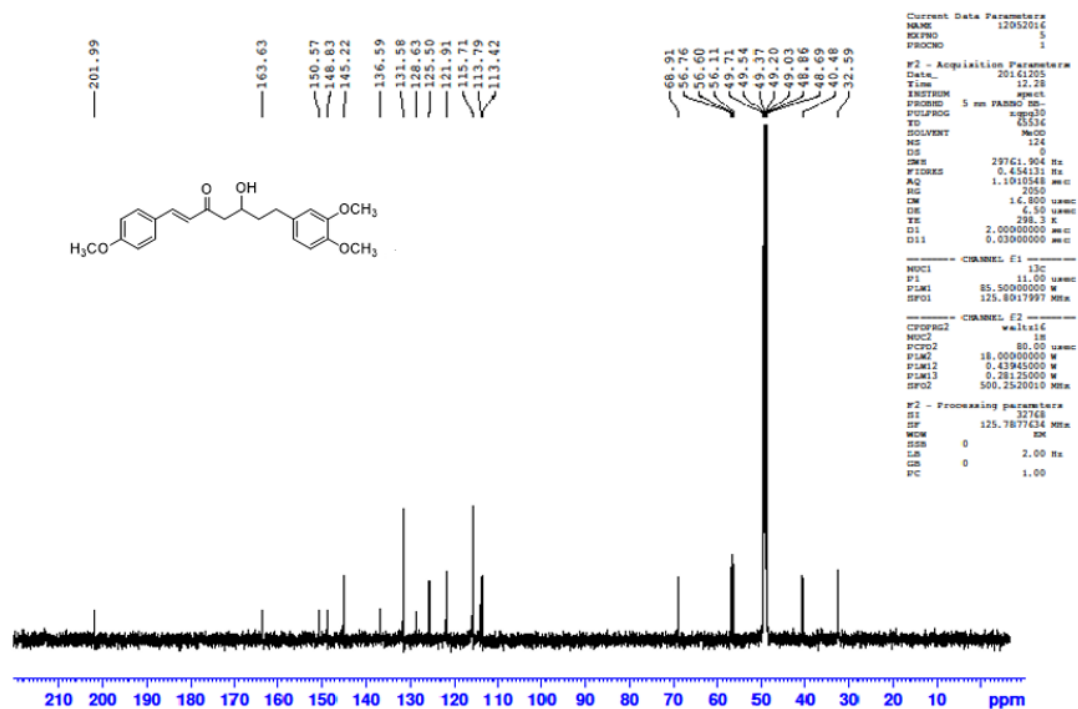

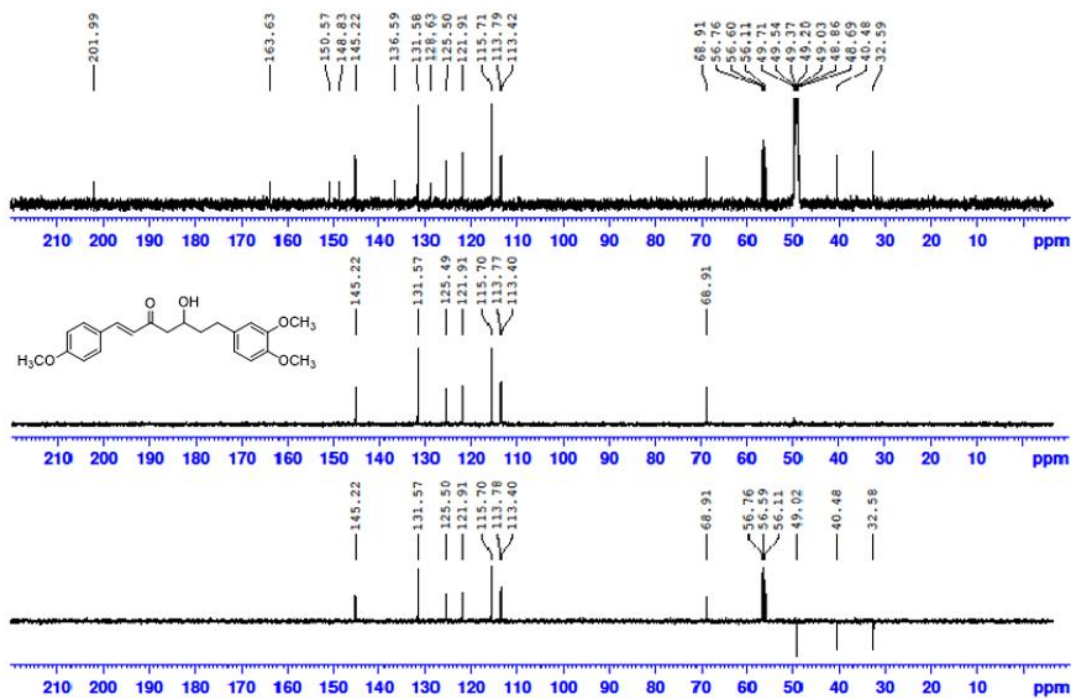

MD6a

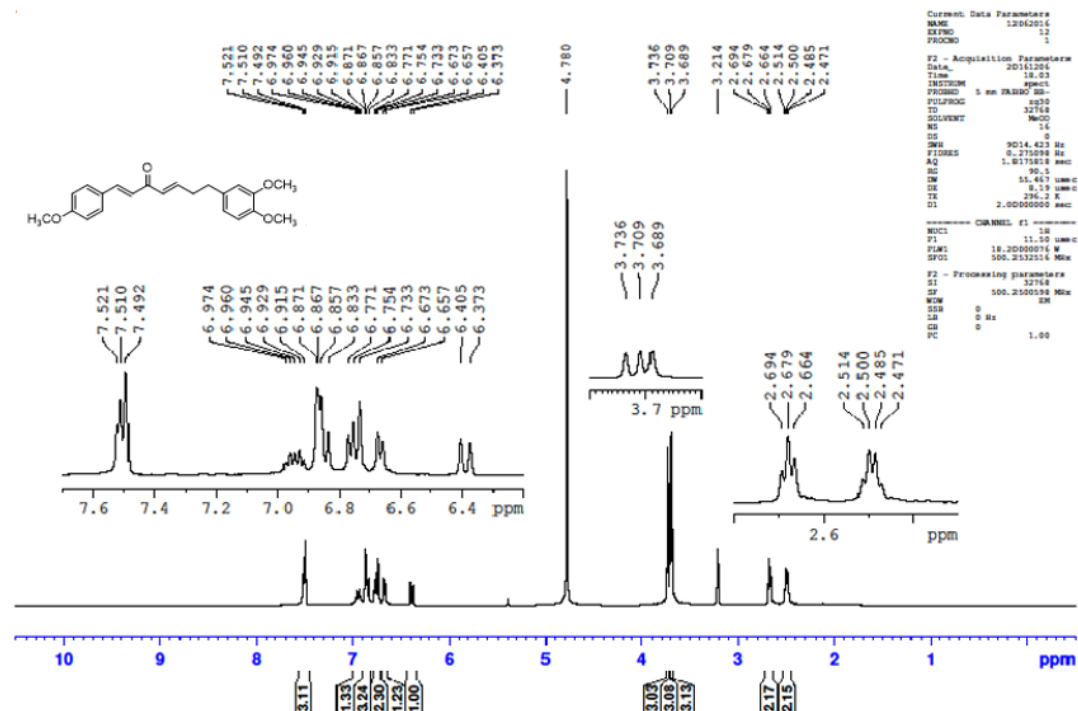

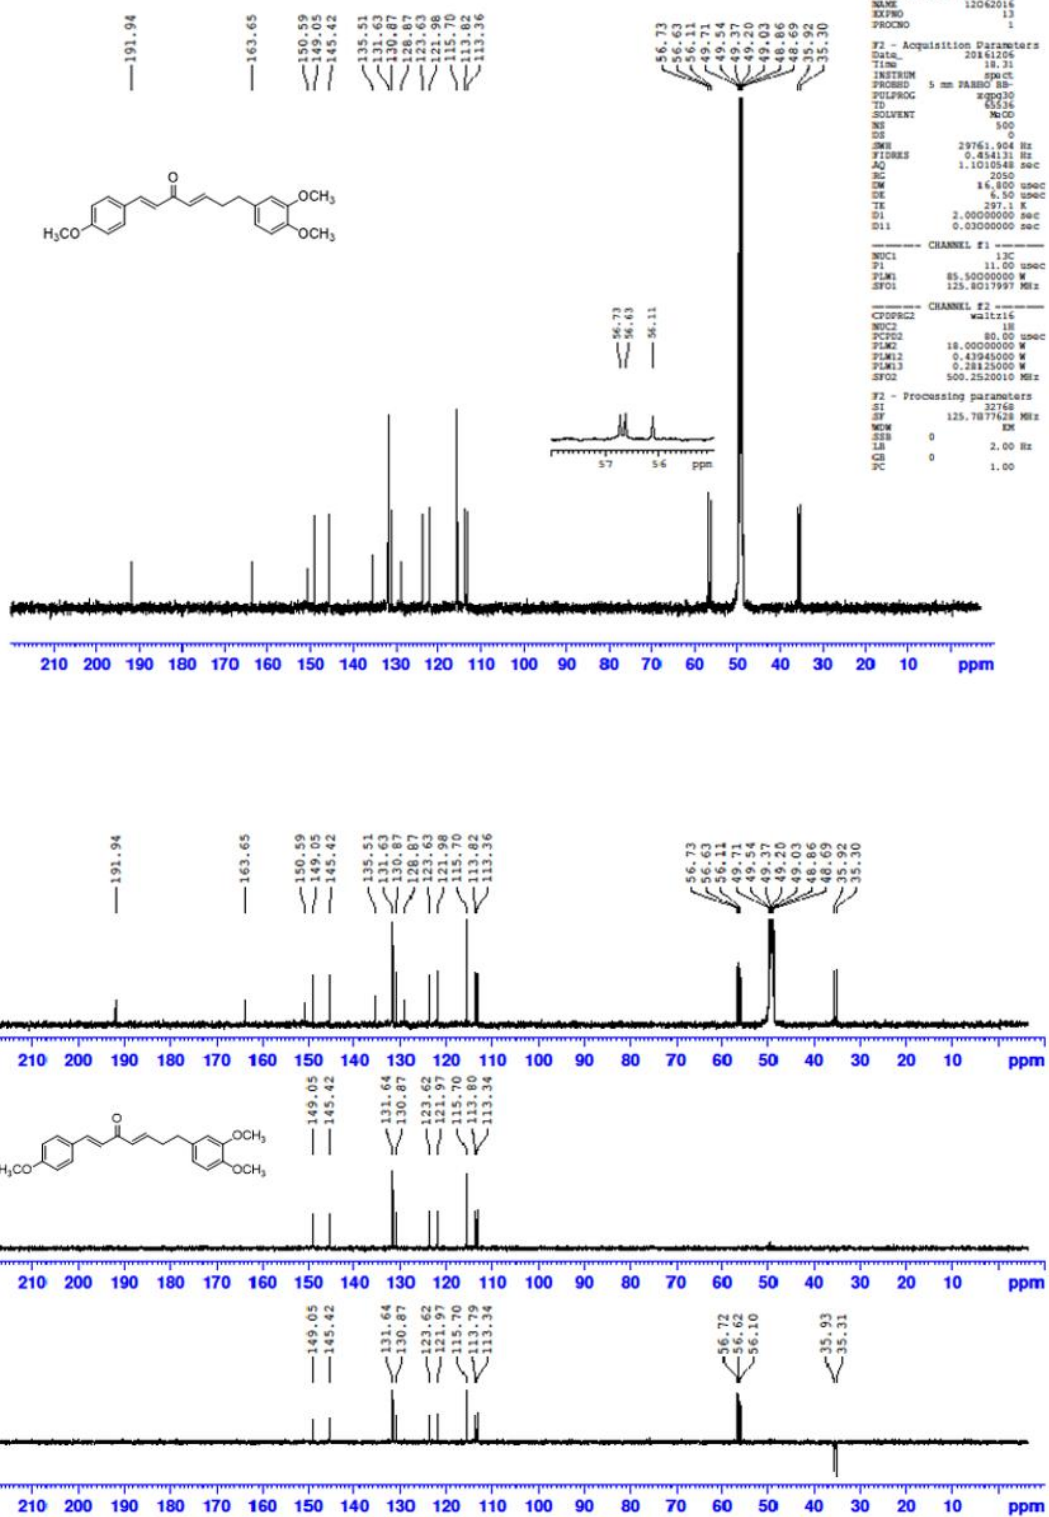

MD7

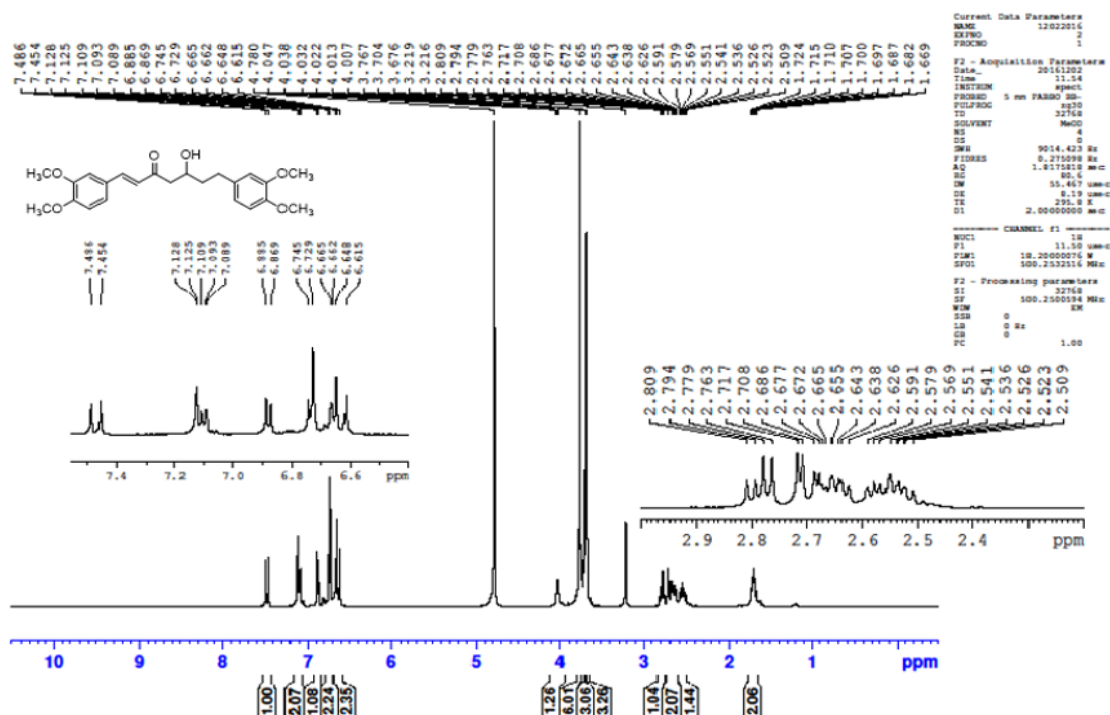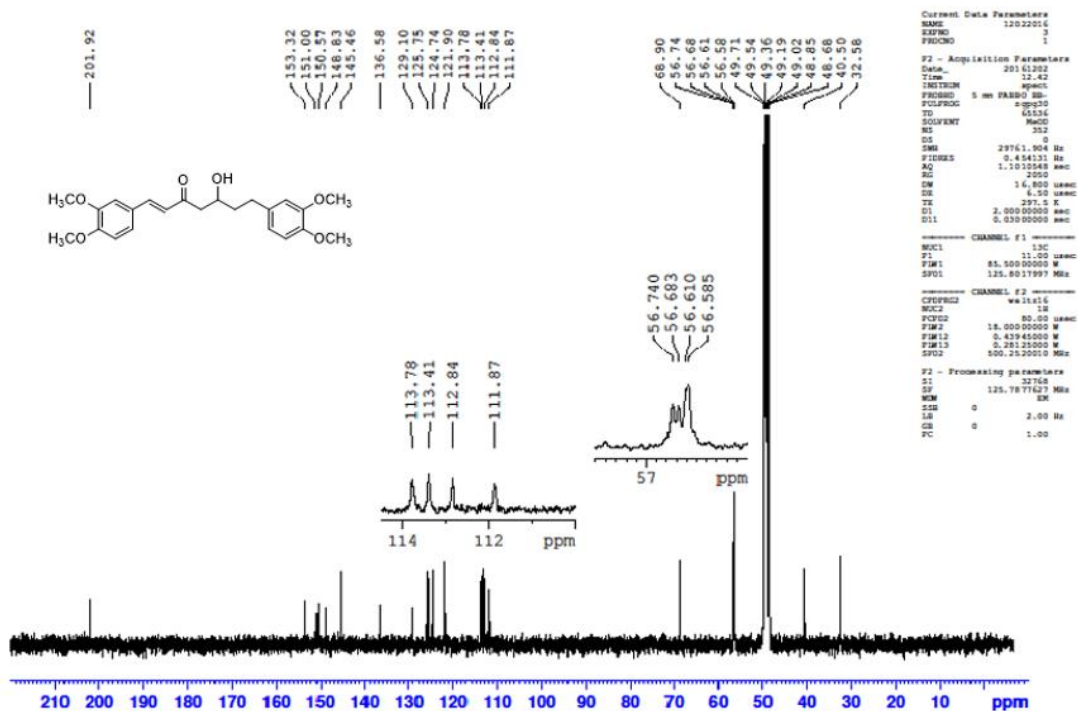

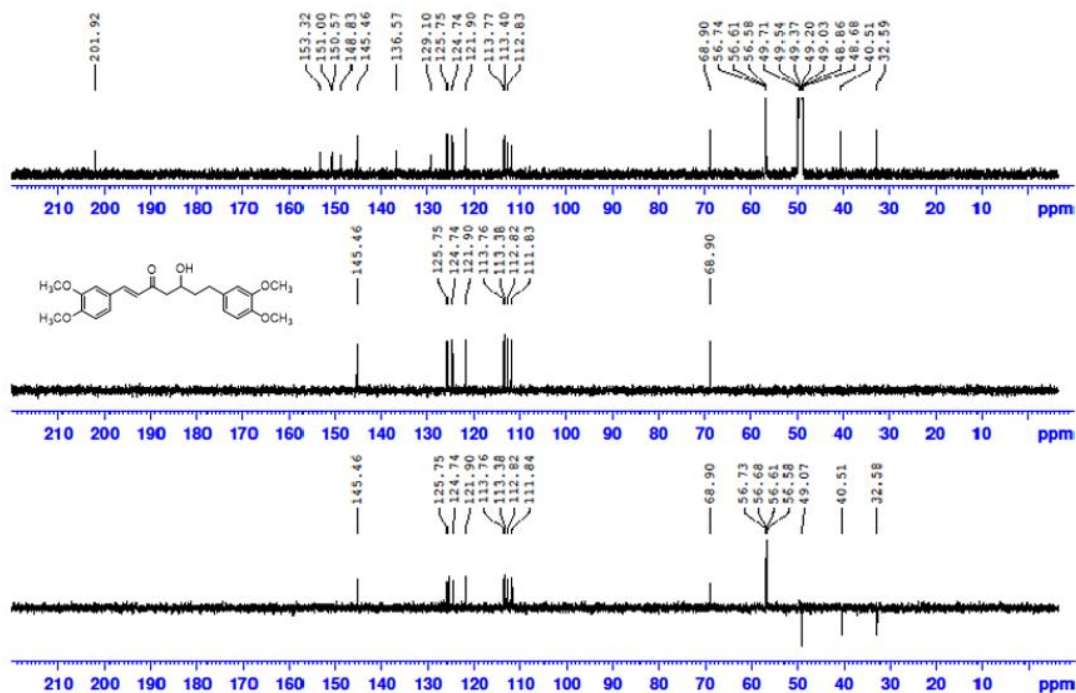

## MD7a

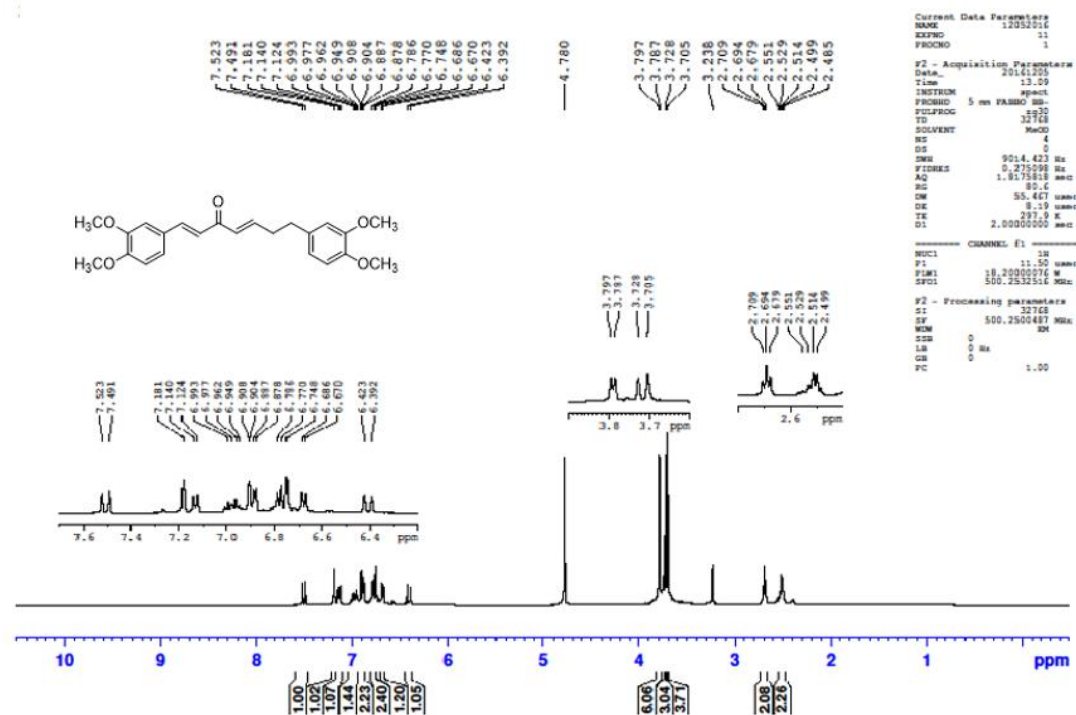



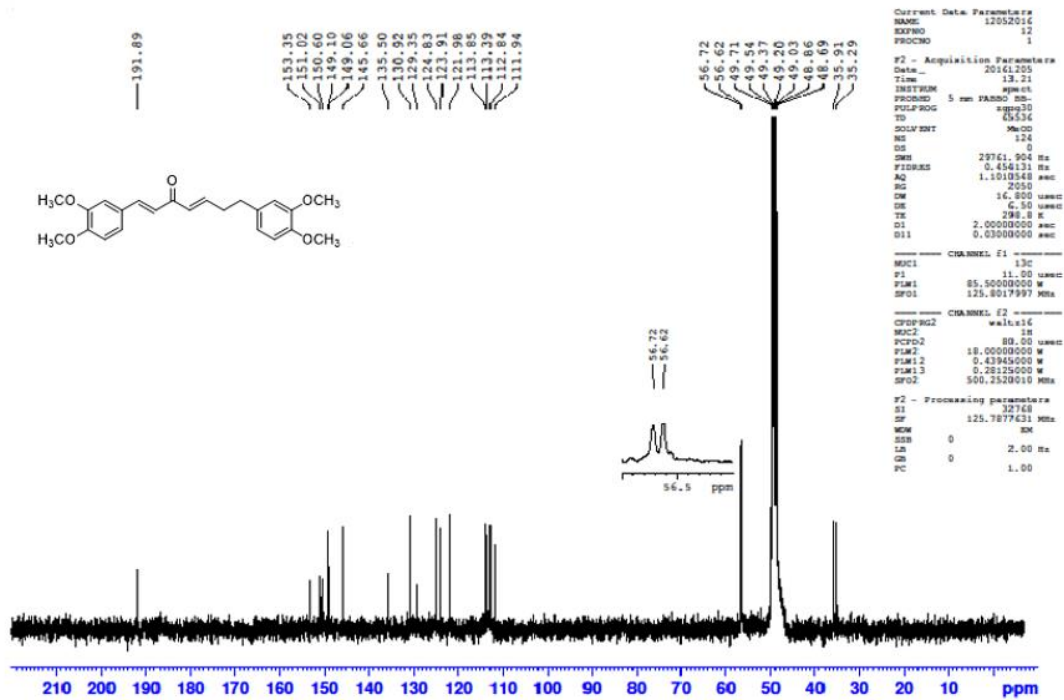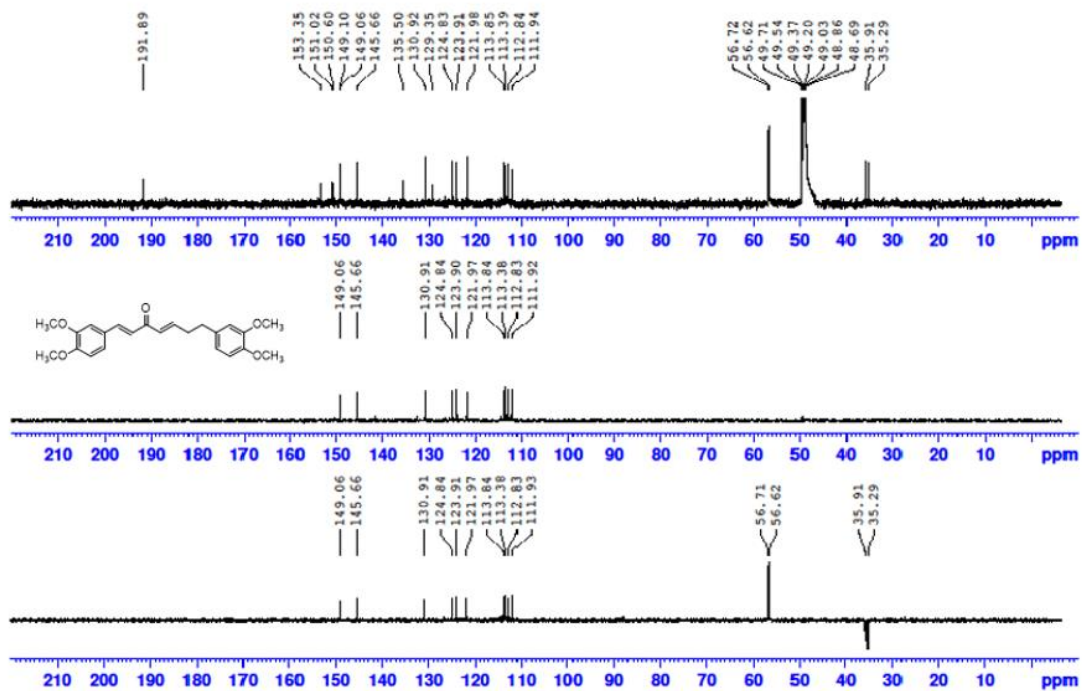

MD8

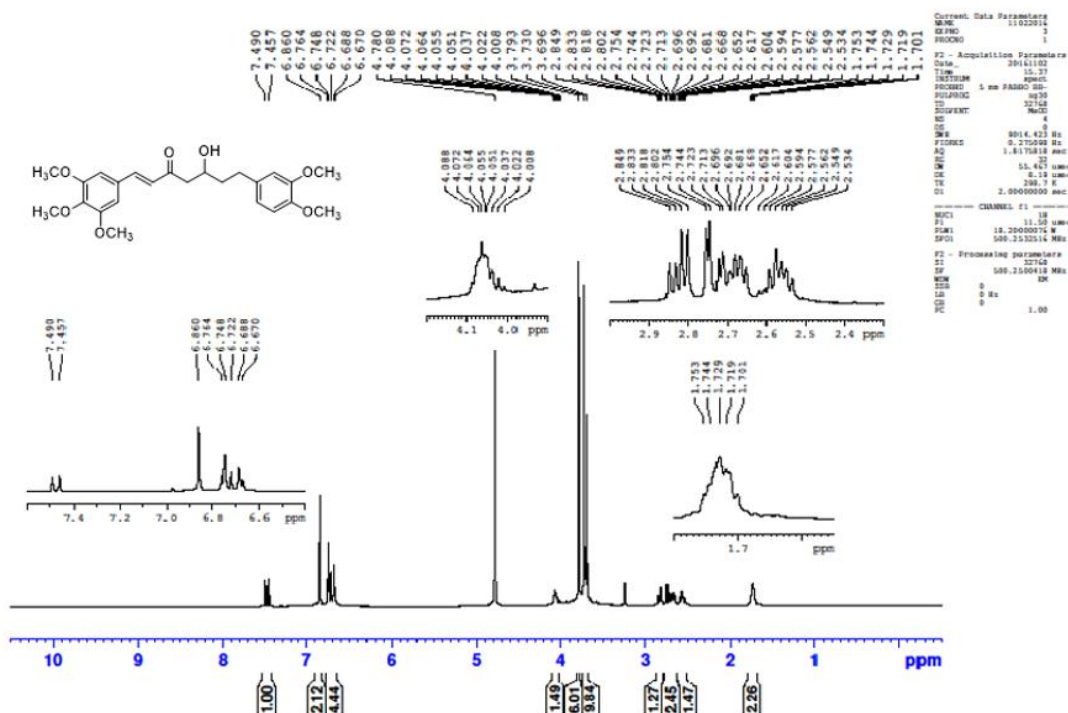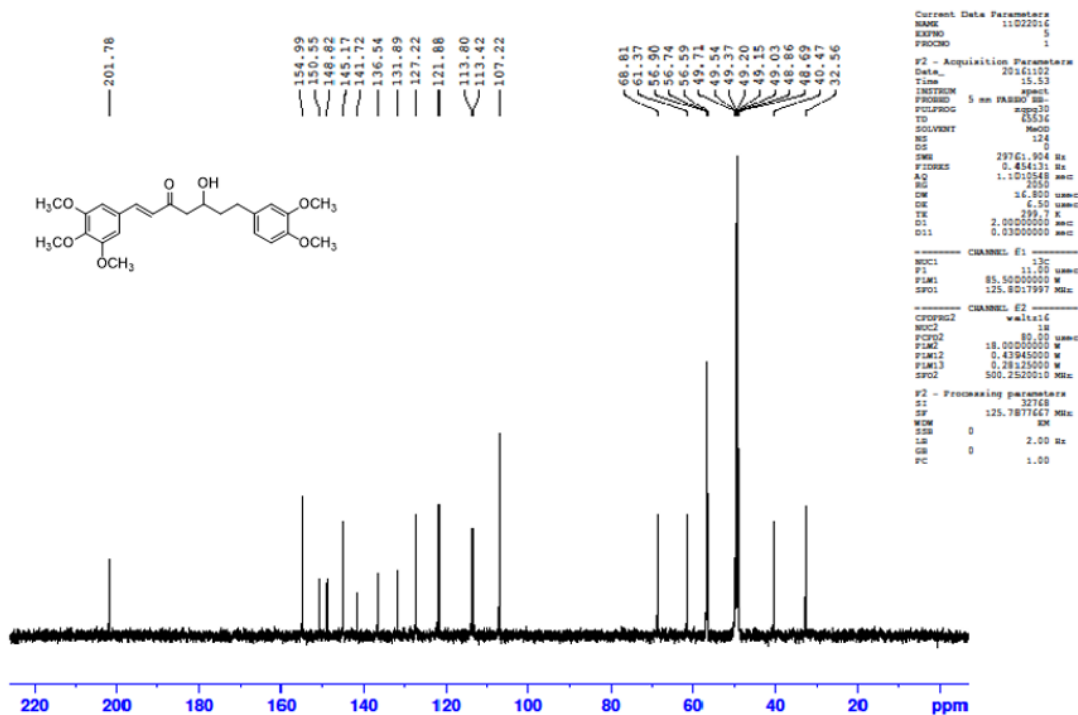



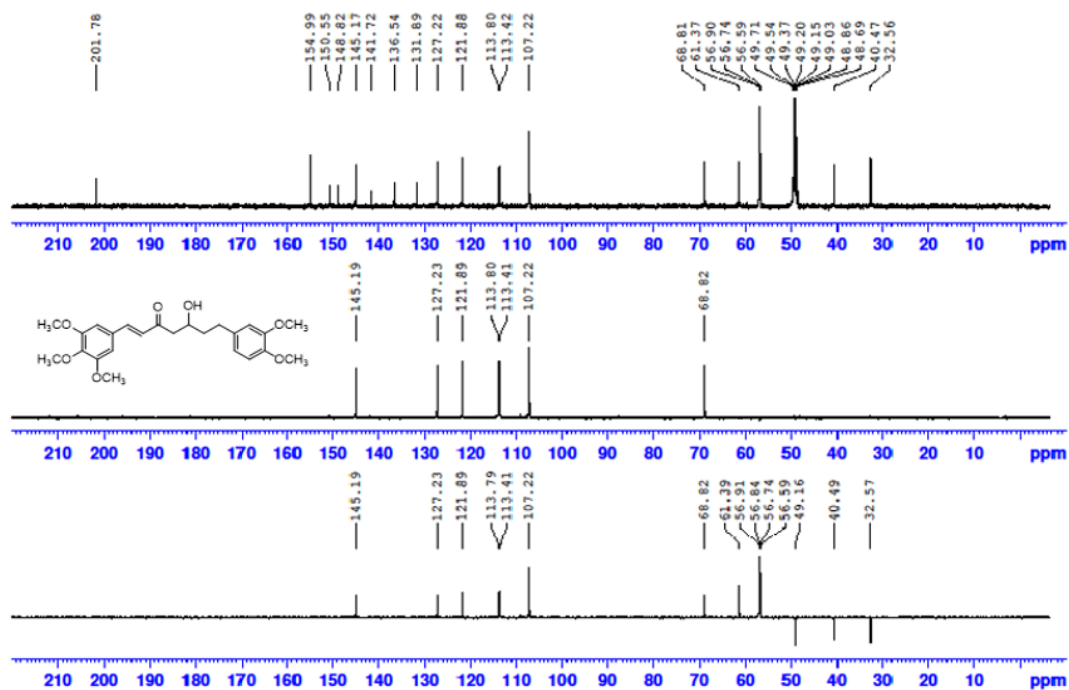

## MD8a

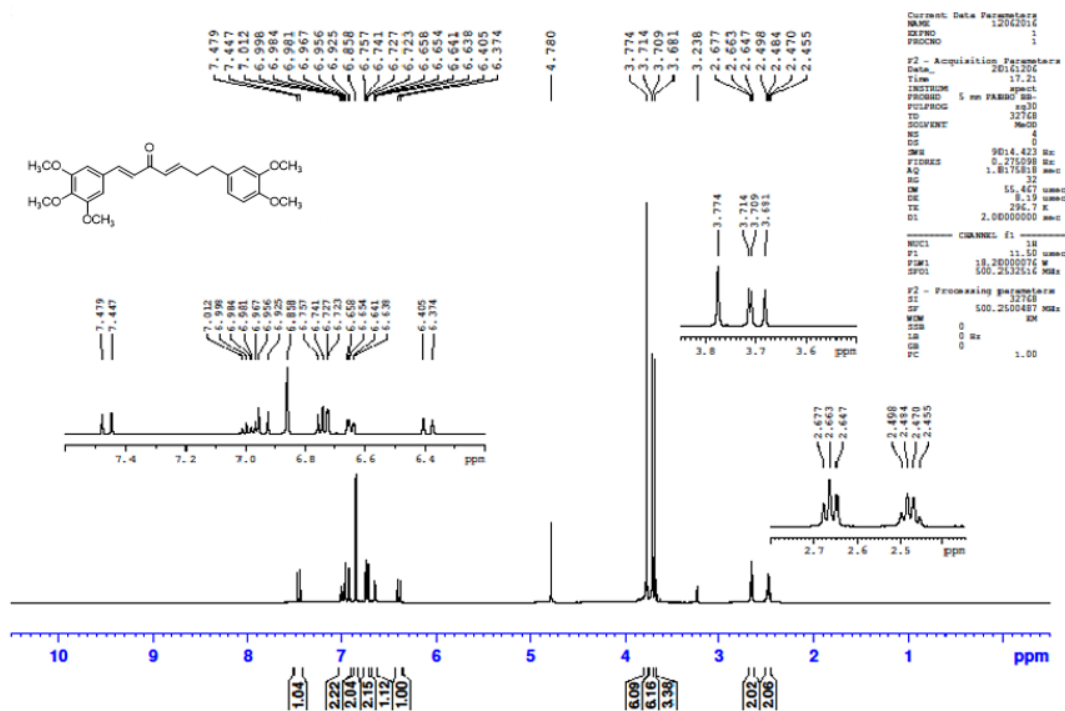

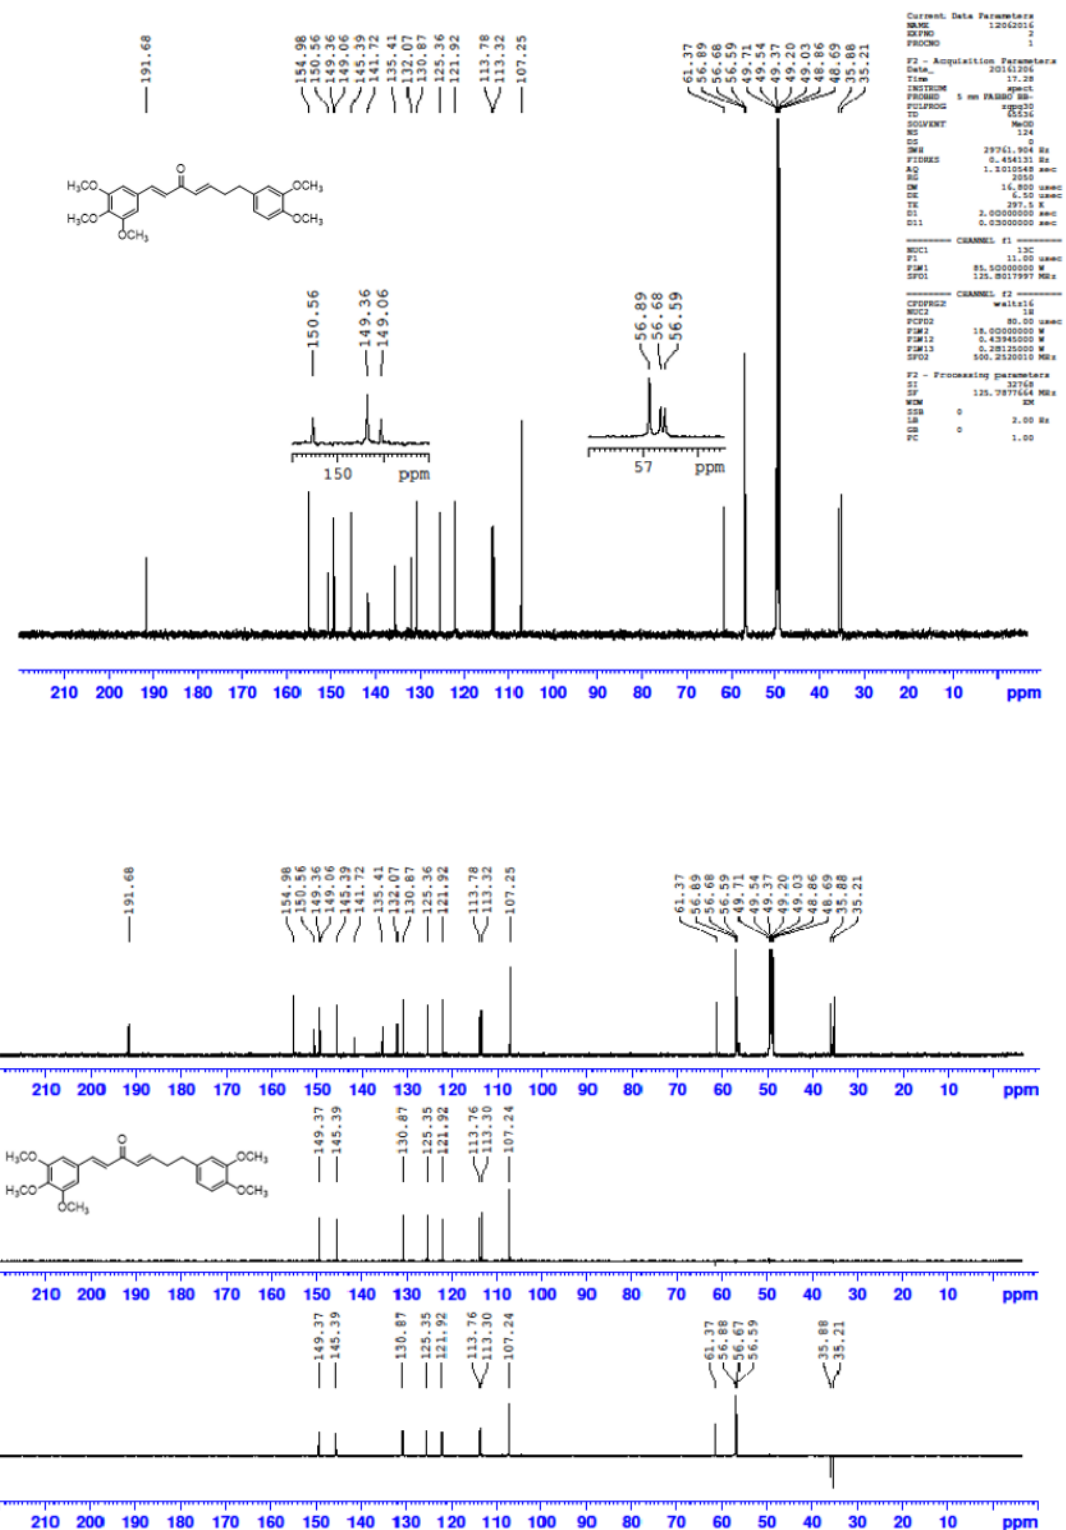

MD9

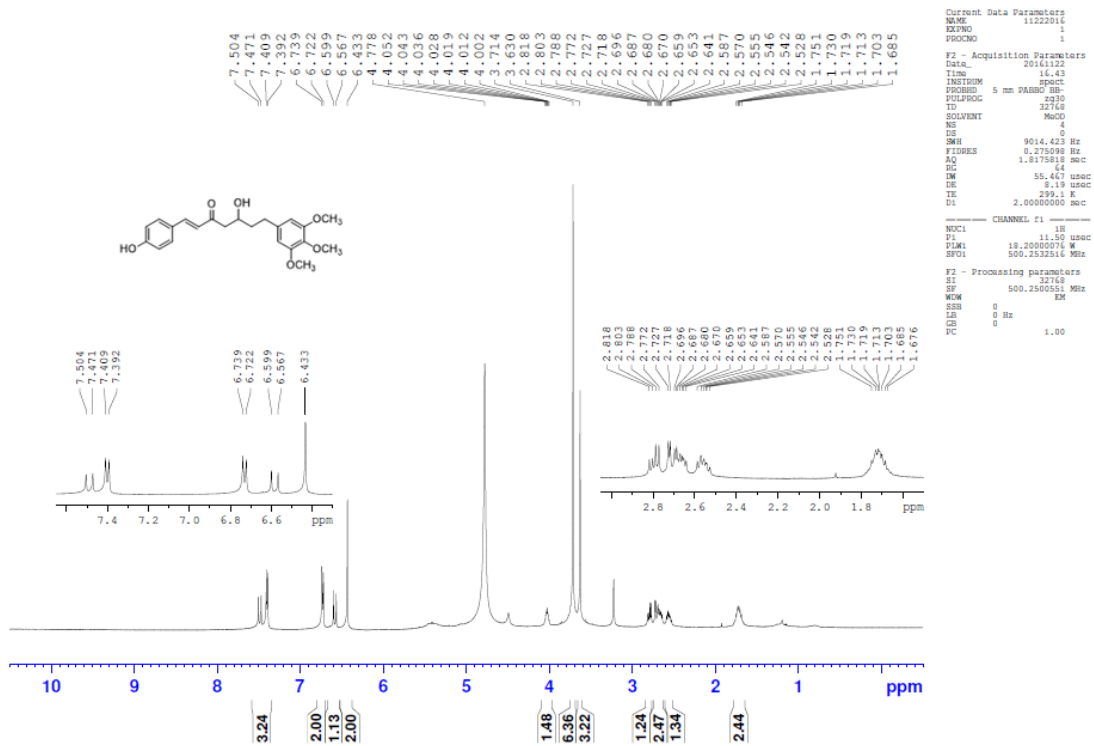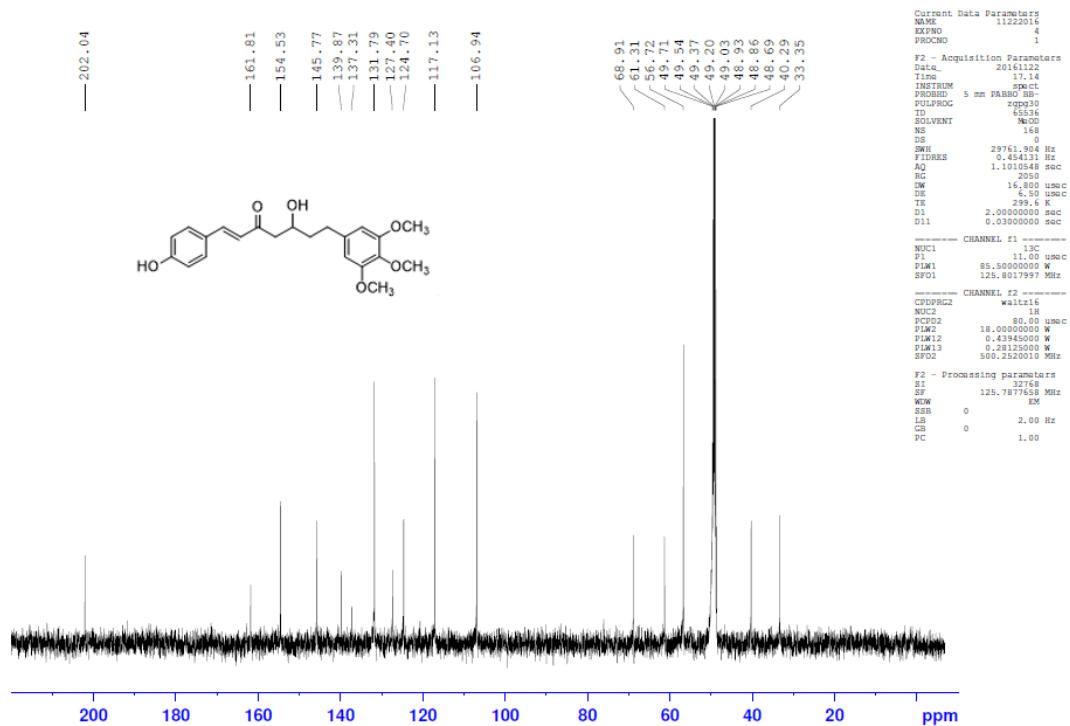

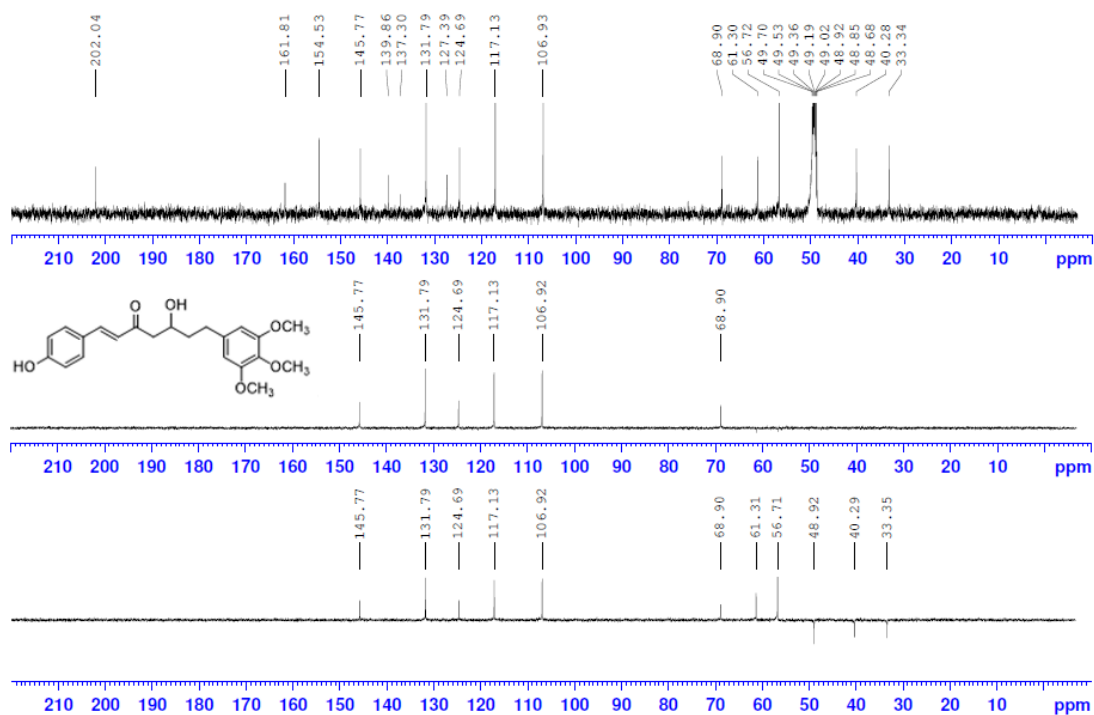

## MD9a

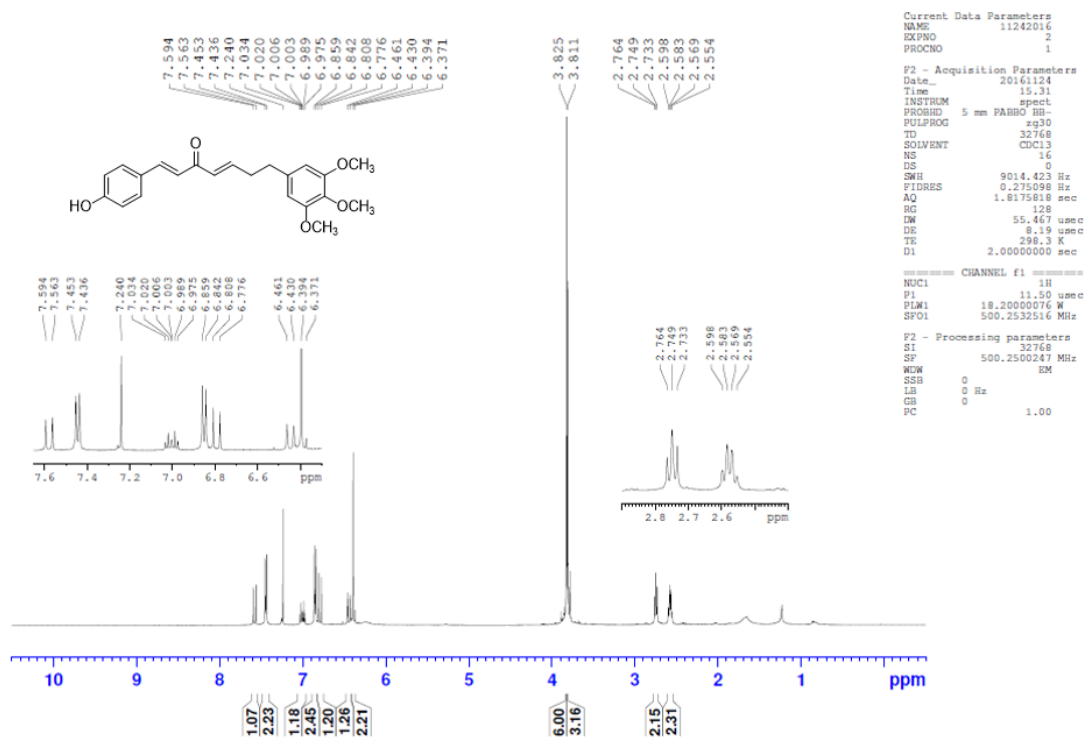

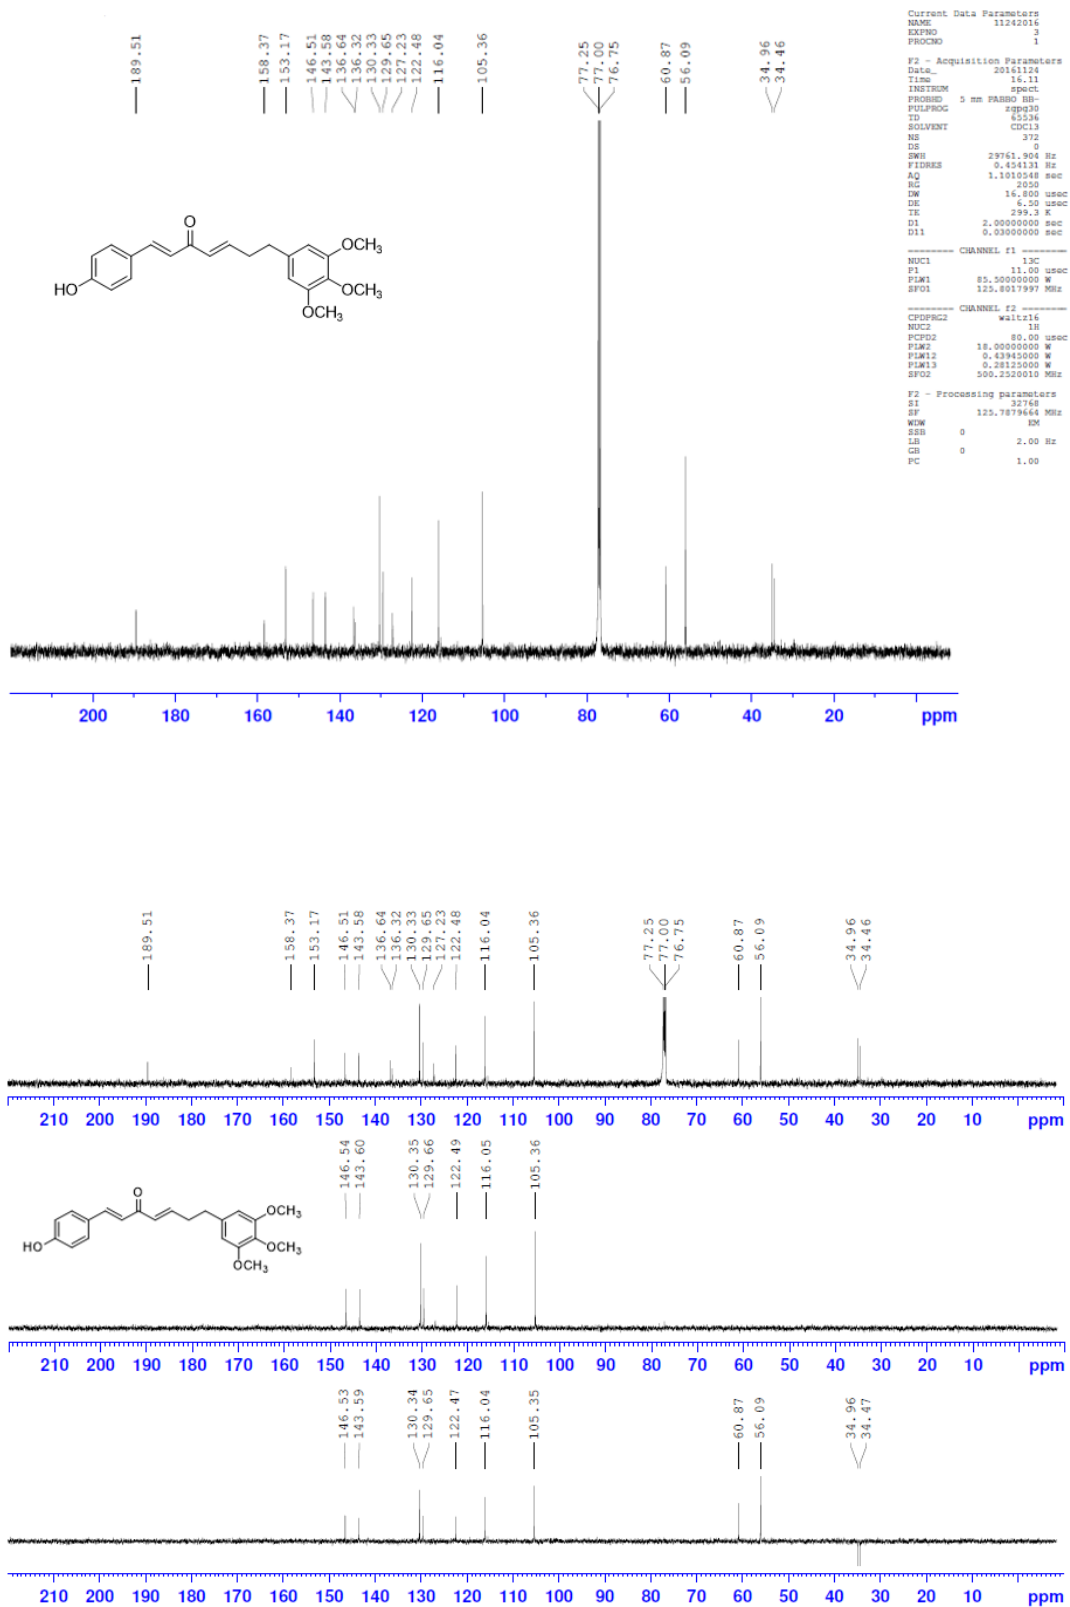

MD10

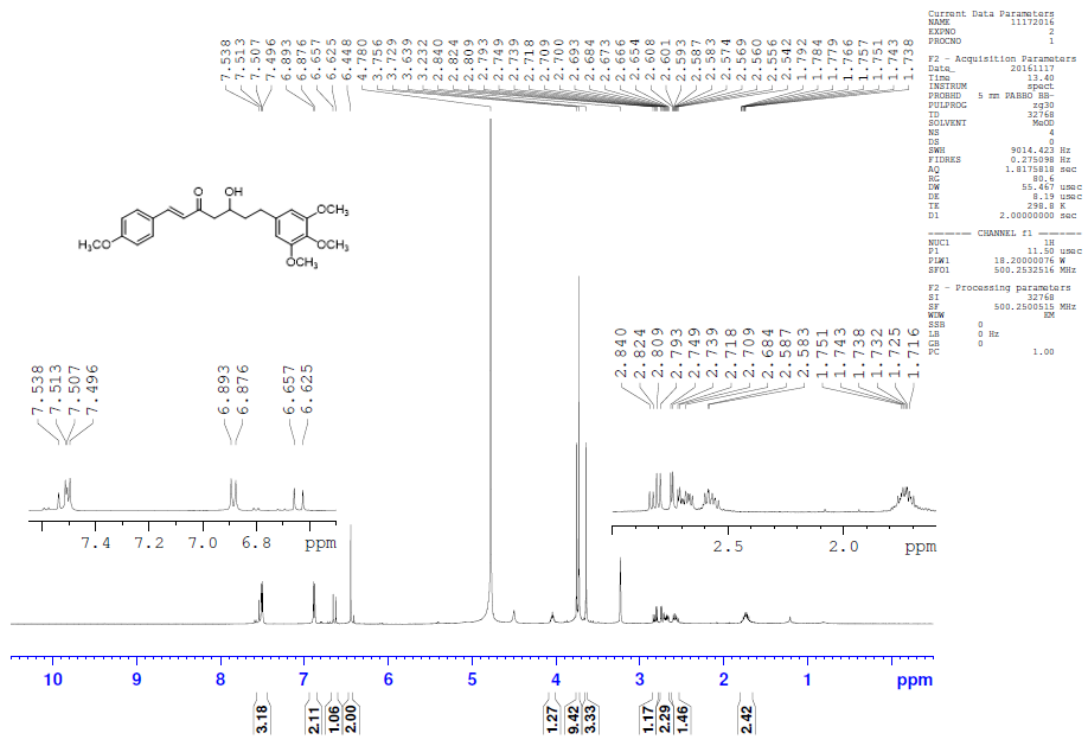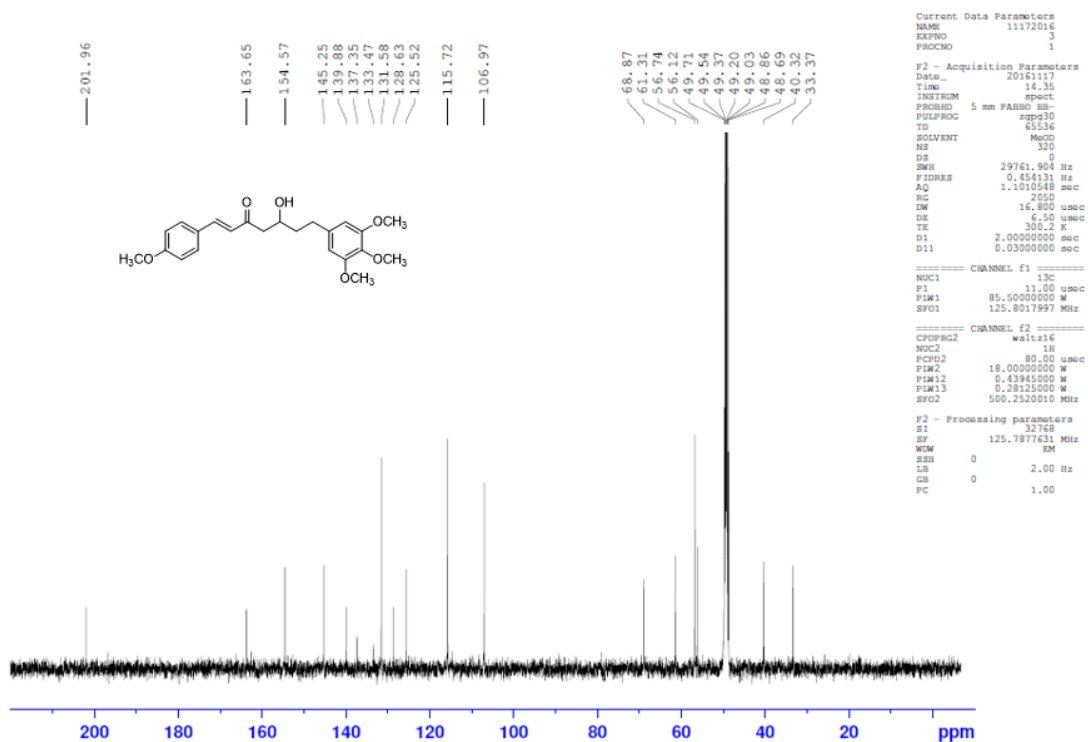

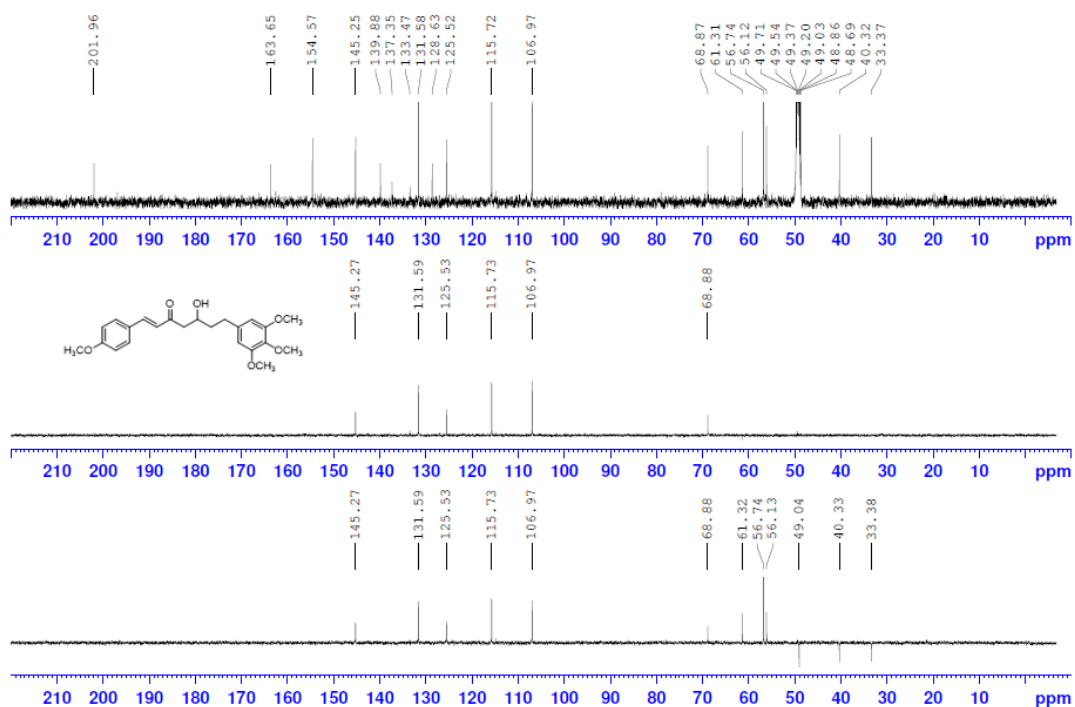

## MD10a

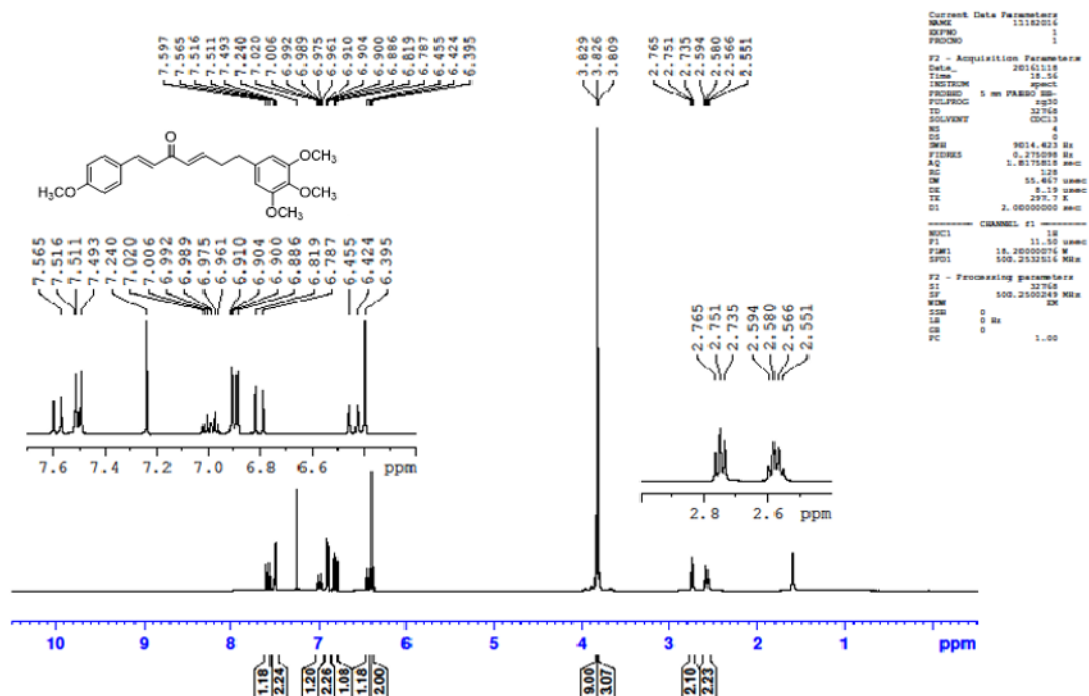

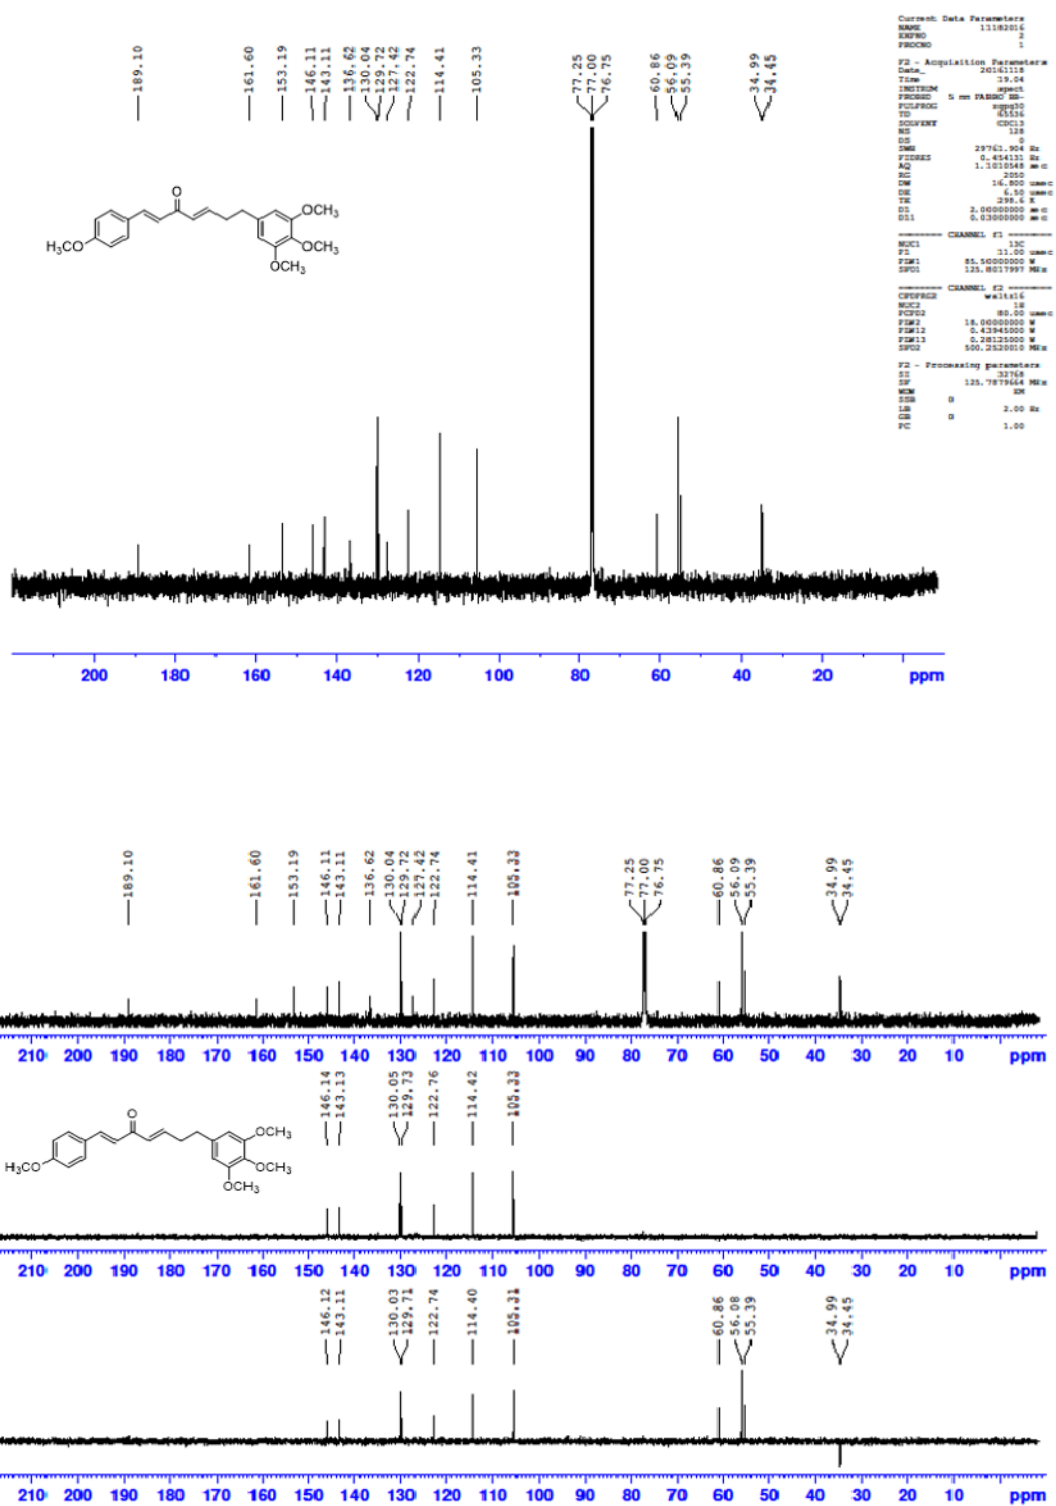

MD11



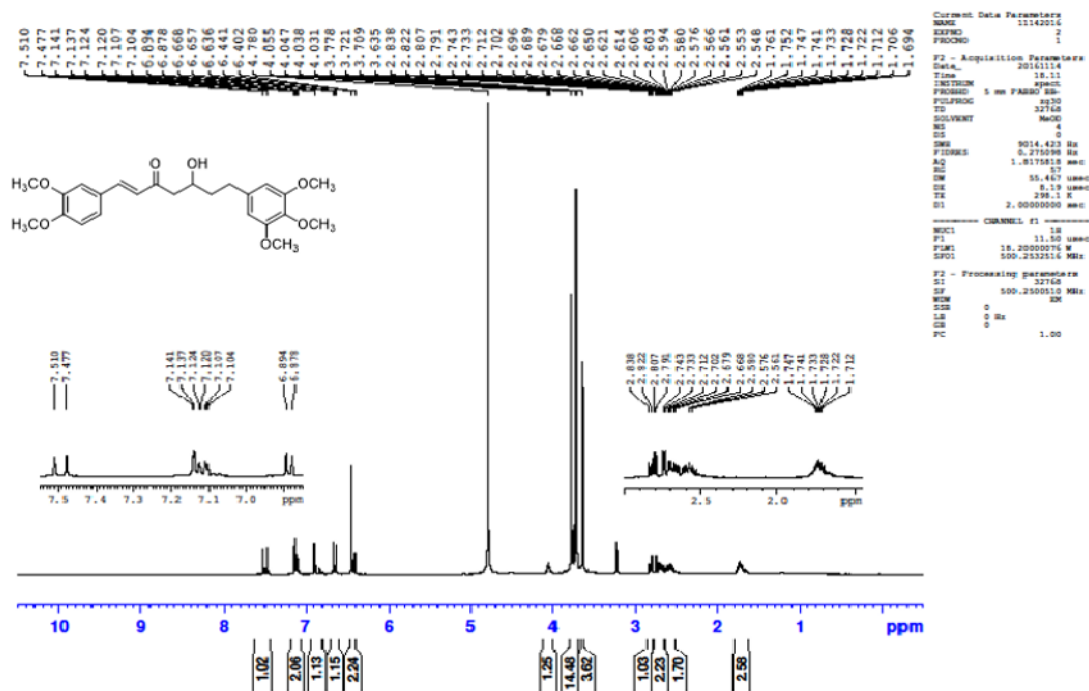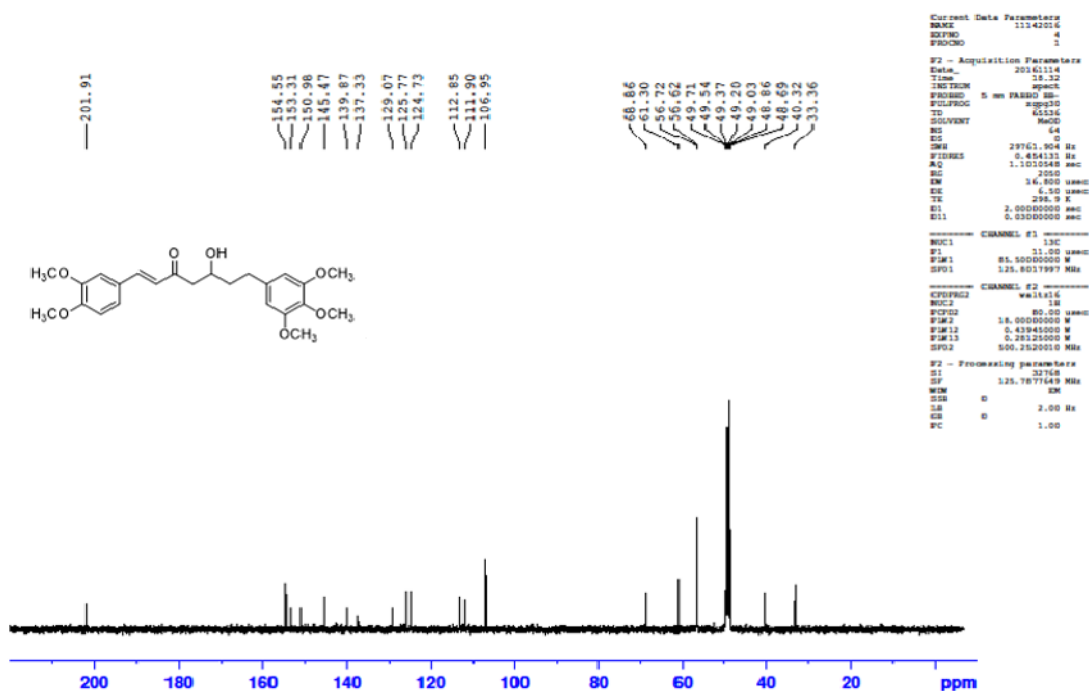



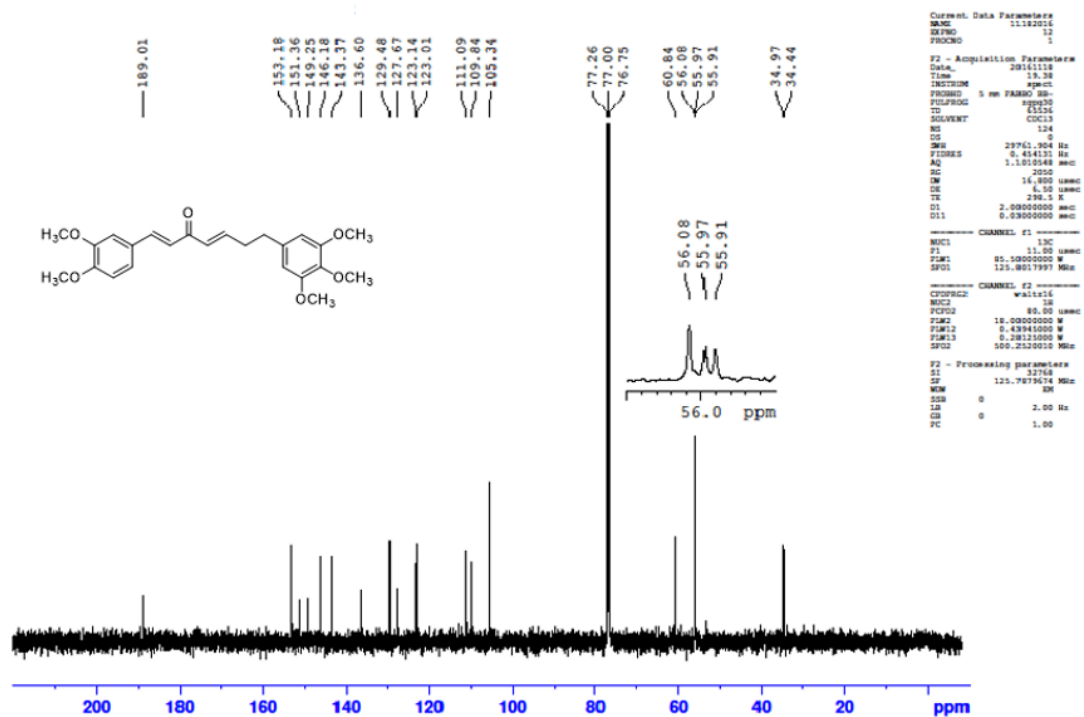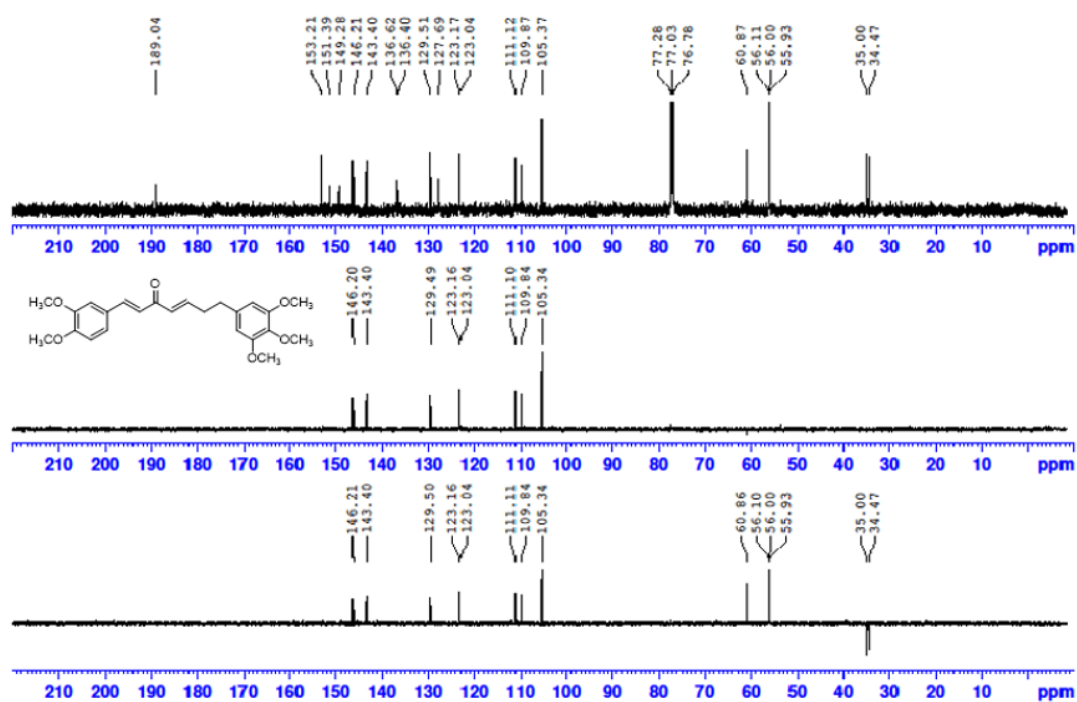

MD12

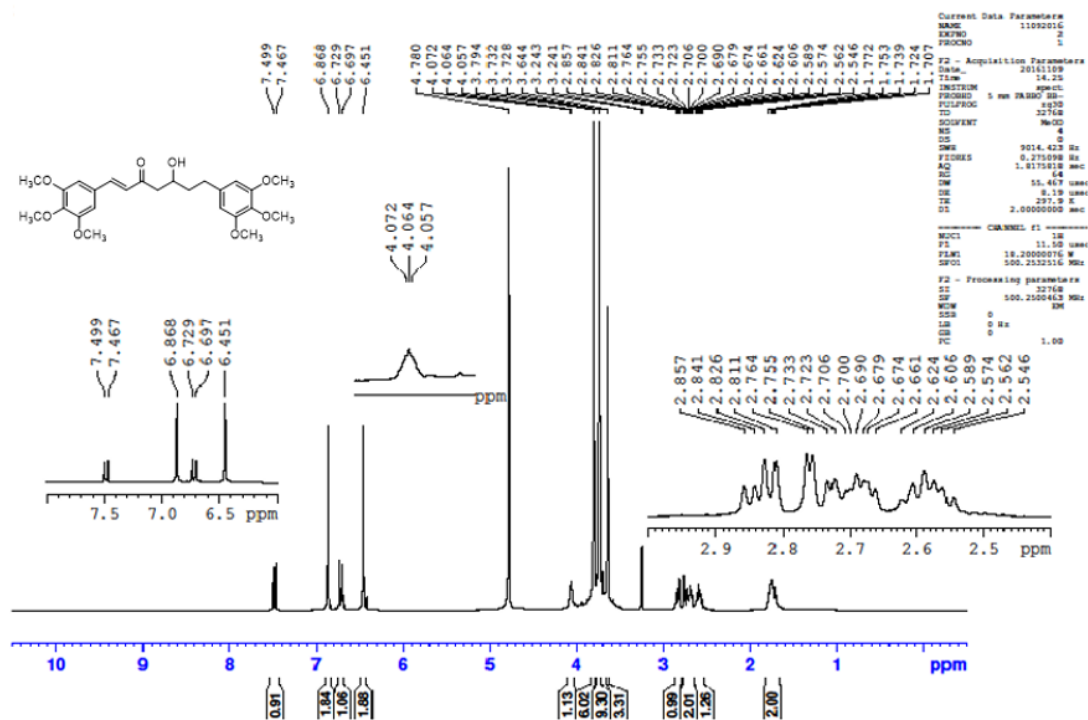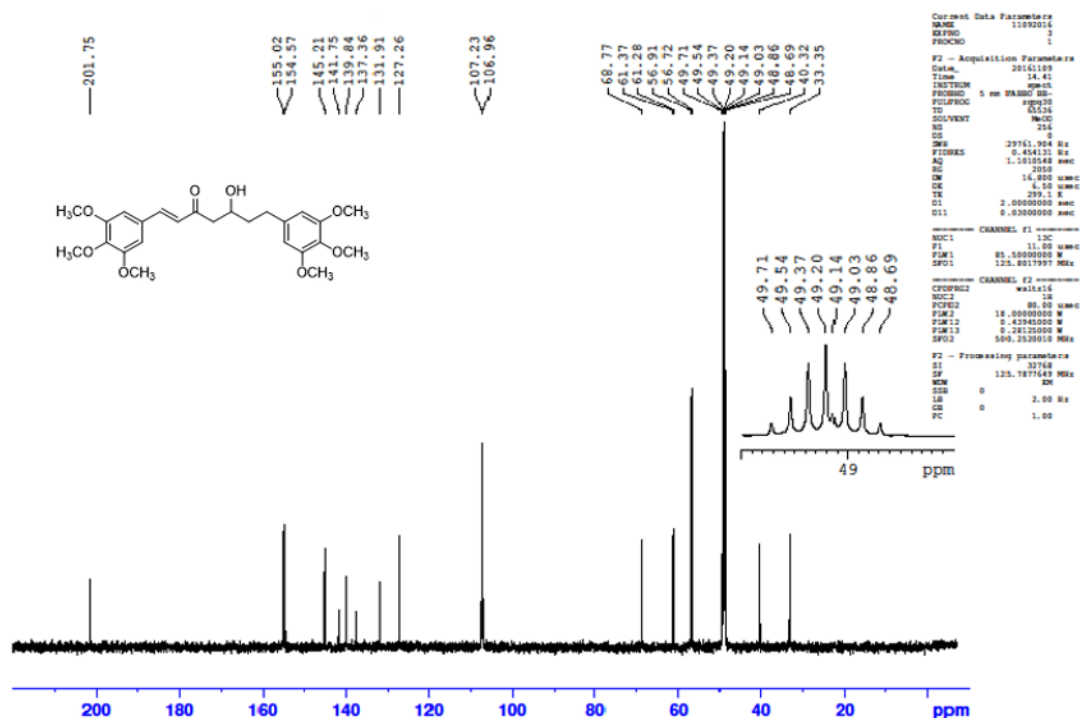

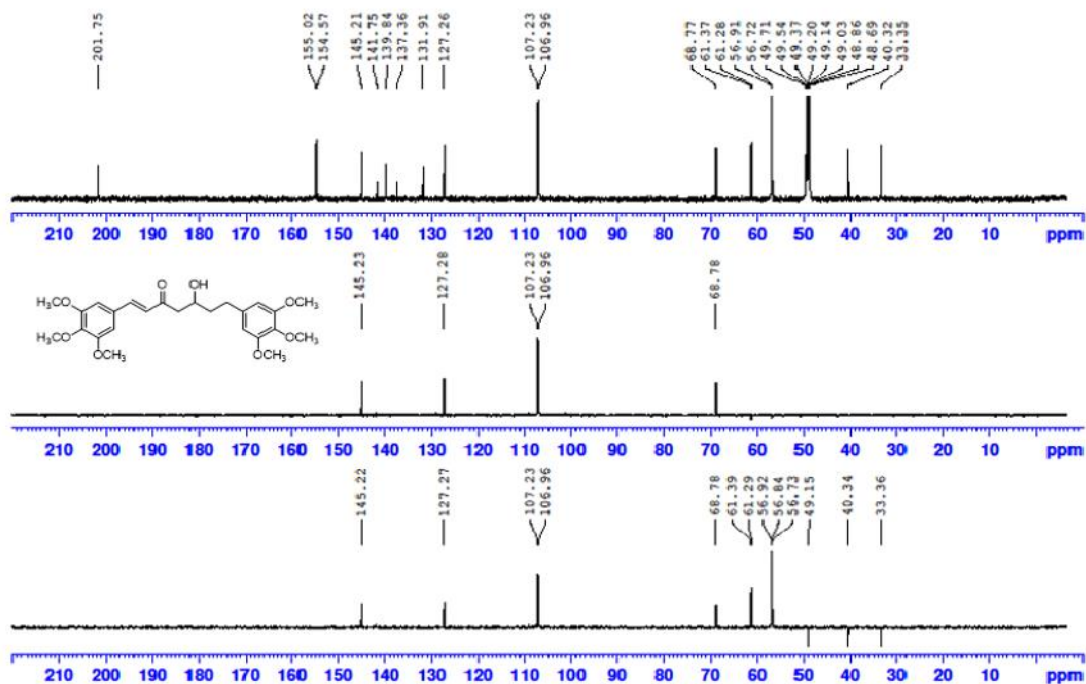

## MD12a

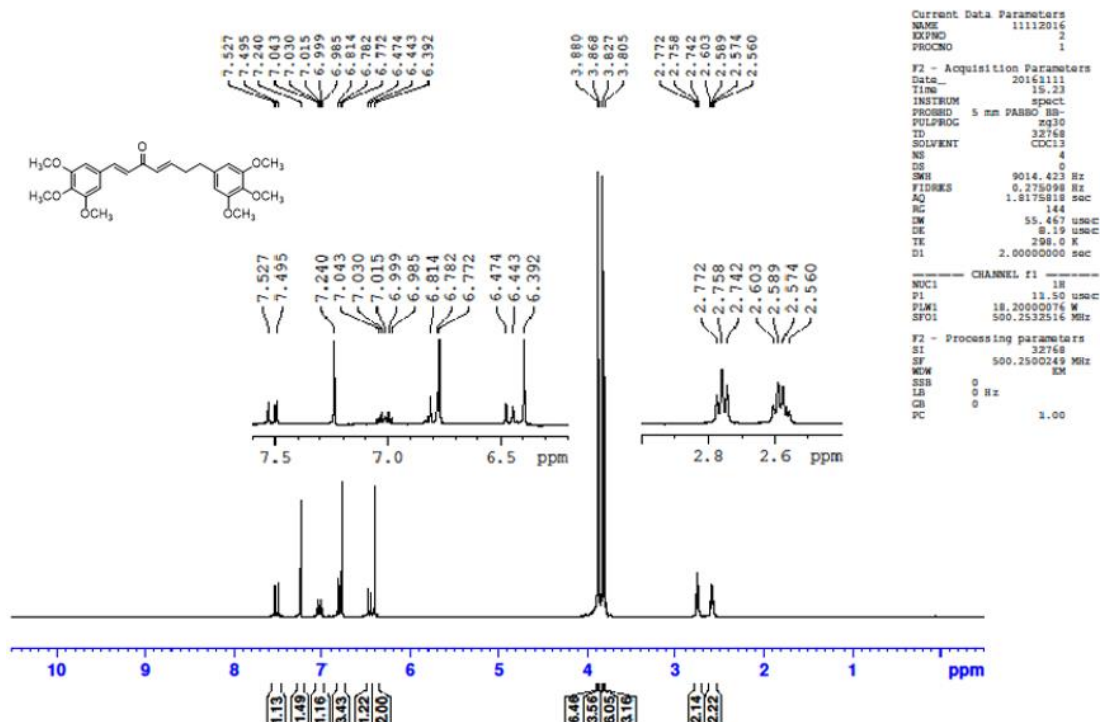

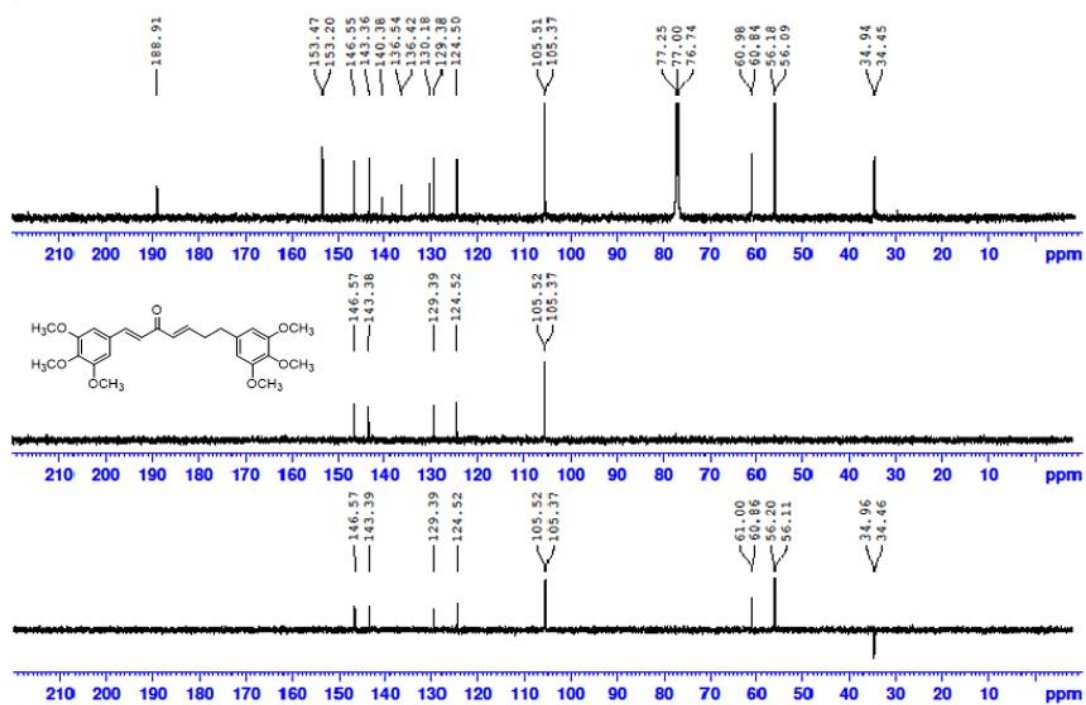

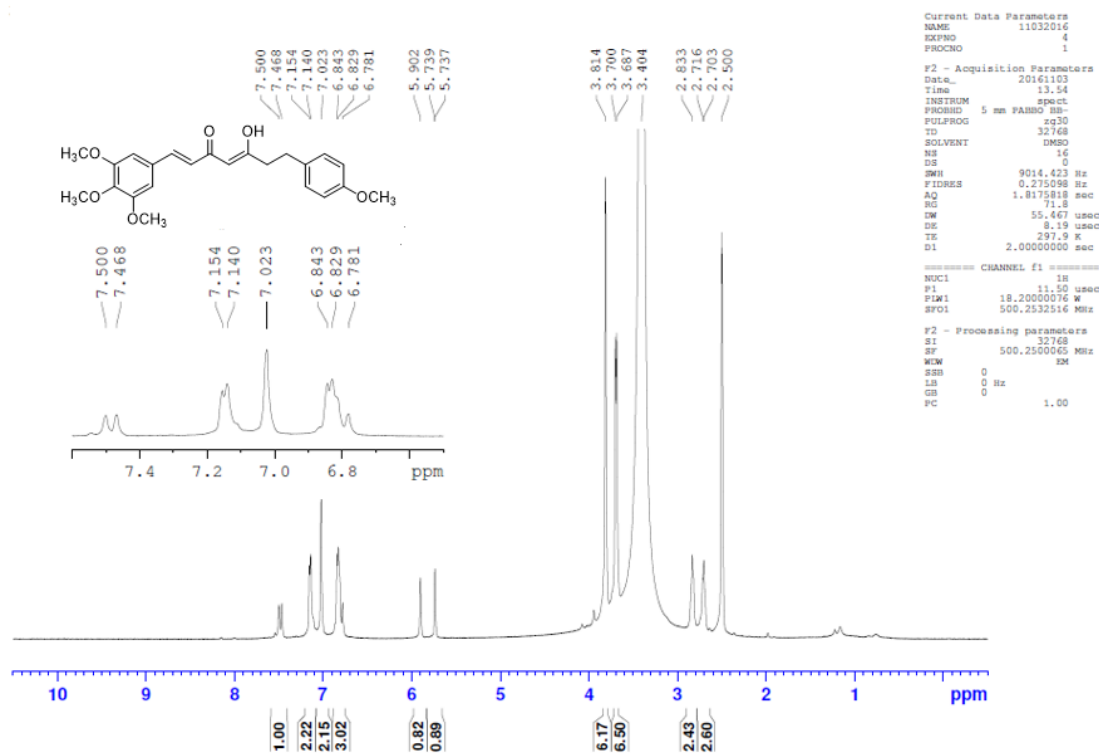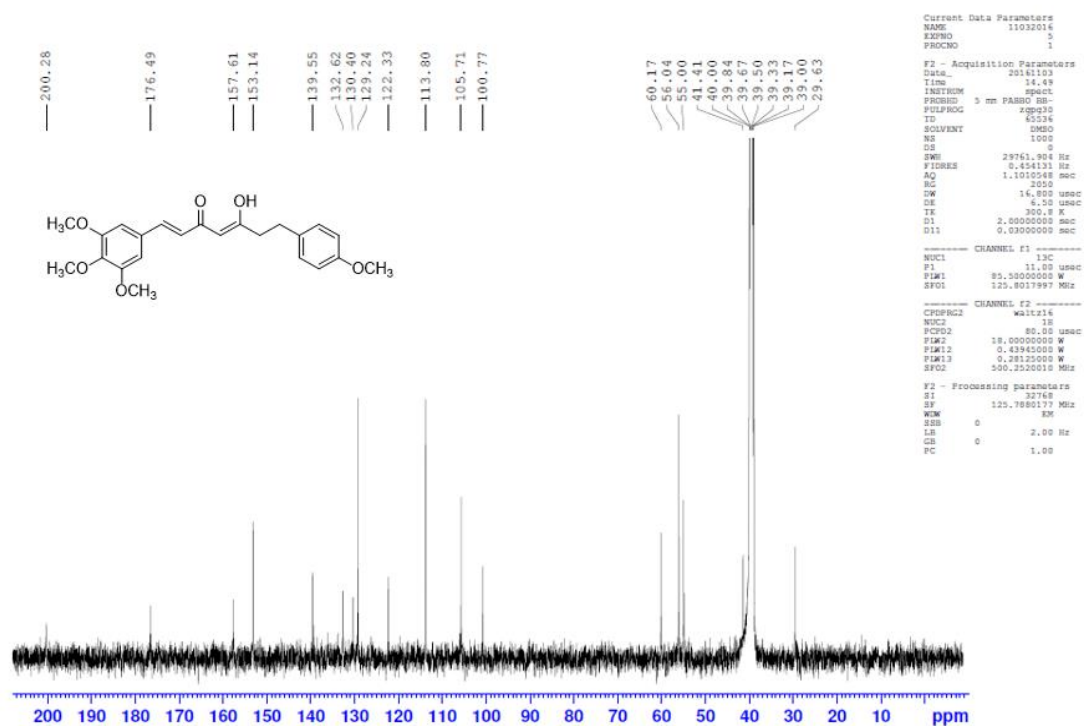



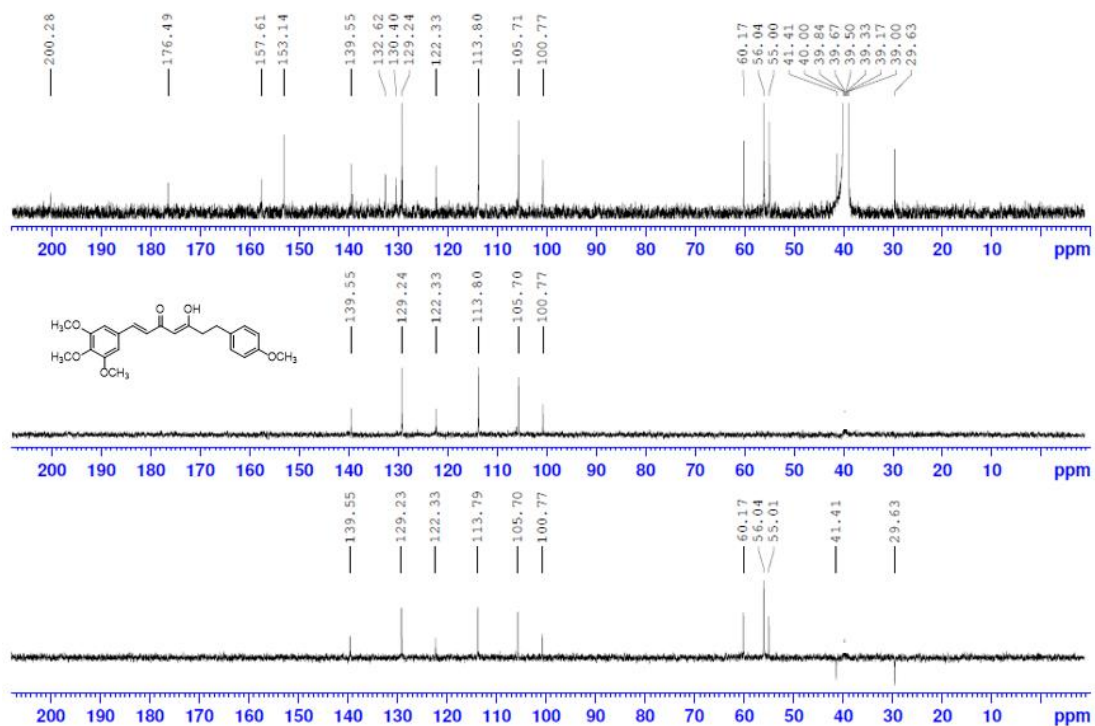

Supplement: s1 [file s1]
